# Supplementary material for: Children’s attitudes towards animals are similar across suburban, exurban, and rural areas
Source: PeerJ. 2019 Jul 23;7:e7328. doi: 10.7717/peerj.7328 (PMC6659664; doi:10.7717/peerj.7328)
Supplement: Supplemental Information 3 [file peerj-07-7328-s003.csv]

school_year	school	reduced_lunch	development	like1_orig	like1_stand	like1_species	like1_order	like1_class	exotic	native_coded	gender	grade	asian	black	hispanic	native_american	white	other	hunt
3	1	low	suburban	dog	dog	dog	dog	mammal	3	0	boy	sixth	0	0	0	0	1	0	no
3	1	low	suburban	graffie	gorilla	gorilla	primate	mammal	1	0	boy	sixth	0	0	0	0	1	0	no
3	1	low	suburban	praying mantis	praying mantis	praying mantis	insect	terrestrial invertebrate	2	1	boy	sixth	0	0	0	0	1	0	no
3	1	low	suburban	turtles	turtle	turtle	turtle	reptile	3	0	boy	sixth	0	0	0	0	1	0	no
3	1	low	suburban	Bears	bear	bear	bear	mammal	2	1	boy	sixth	0	0	1	0	0	0	no
3	1	low	suburban	Birds	bird	bird	bird	bird	3	0	boy	sixth	0	0	1	0	0	0	no
3	1	low	suburban	Panthers	panther	panther	big cat	mammal	1	0	boy	sixth	0	0	1	0	0	0	no
3	1	low	suburban	Wolfs	wolf	wolf	canid	mammal	1	0	boy	sixth	0	0	1	0	0	0	no
3	1	low	suburban	Cheetah	cheetah	cheetah	felid	mammal	1	0	girl	sixth	0	0	0	0	1	1	no
3	1	low	suburban	Fox	fox	fox	canid	mammal	2	1	girl	sixth	0	0	0	0	1	1	no
3	1	low	suburban	Lion	lion	lion	big cat	mammal	1	0	girl	sixth	0	0	0	0	1	1	no
3	1	low	suburban	Snowleopard	snow leopard	snow leopard	big cat	mammal	1	0	girl	sixth	0	0	0	0	1	1	no
3	1	low	suburban	leperd	leopard	leopard	big cat	mammal	1	0	boy	sixth	0	0	0	0	1	0	yes
3	1	low	suburban	Liger	liger	liger	big cat	mammal	1	0	boy	sixth	0	0	0	0	1	0	yes
3	1	low	suburban	lion	lion	lion	big cat	mammal	1	0	boy	sixth	0	0	0	0	1	0	yes
3	1	low	suburban	tiger	tiger	tiger	big cat	mammal	1	0	boy	sixth	0	0	0	0	1	0	yes
3	1	low	suburban	Birds	bird	bird	bird	bird	3	0	girl	sixth	0	0	0	0	1	0	no
3	1	low	suburban	Cats	cat	cat	cat	mammal	3	0	girl	sixth	0	0	0	0	1	0	no
3	1	low	suburban	Turtles	turtle	turtle	turtle	reptile	3	0	girl	sixth	0	0	0	0	1	0	no
3	1	low	suburban	Hedgehog	hedgehog	hedgehog	small mammal	mammal	1	0	boy	sixth	0	0	0	0	1	0	no
3	1	low	suburban	Mouse	mouse	mouse	small mammal	mammal	1	0	boy	sixth	0	0	0	0	1	0	no
3	1	low	suburban	Snake	snake	snake	snake	reptile	3	0	boy	sixth	0	0	0	0	1	0	no
3	1	low	suburban	Chinchilas	chinchilla	chinchilla	small mammal	mammal	3	0	girl	sixth	0	0	0	0	1	1	no
3	1	low	suburban	Dog	dog	dog	dog	mammal	3	0	girl	sixth	0	0	0	0	1	1	no
3	1	low	suburban	Ferret	ferret	ferret	other carnivore	mammal	3	0	girl	sixth	0	0	0	0	1	1	no
3	1	low	suburban	Turtles	turtle	turtle	turtle	reptile	3	0	girl	sixth	0	0	0	0	1	1	no
3	1	low	suburban	Monkeys, Parrots, Cats,Dogs	monkey	monkey	primate	mammal	1	0	no response	sixth	0	0	0	0	0	0	no response
3	1	low	suburban	Monkeys, Parrots, Cats,Dogs	monkey	monkey	primate	mammal	1	0	no response	sixth	0	0	0	0	0	0	no response
3	1	low	suburban	Monkeys, Parrots, Cats,Dogs	monkey	monkey	primate	mammal	1	0	no response	sixth	0	0	0	0	0	0	no response
3	1	low	suburban	Monkeys, Parrots, Cats,Dogs	monkey	monkey	primate	mammal	1	0	no response	sixth	0	0	0	0	0	0	no response
3	1	low	suburban	cats	cat	cat	cat	mammal	3	0	boy	sixth	0	0	0	0	1	0	yes
3	1	low	suburban	dogs	dog	dog	dog	mammal	3	0	boy	sixth	0	0	0	0	1	0	yes
3	1	low	suburban	fish	fish	fish	fish	fish	3	0	boy	sixth	0	0	0	0	1	0	yes
3	1	low	suburban	monkeys	monkey	monkey	primate	mammal	1	0	boy	sixth	0	0	0	0	1	0	yes
3	1	low	suburban	cat	cat	cat	cat	mammal	3	0	girl	sixth	0	0	0	0	1	0	no
3	1	low	suburban	deer	deer	deer	ungulate	mammal	2	1	girl	sixth	0	0	0	0	1	0	no
3	1	low	suburban	dog	dog	dog	dog	mammal	3	0	girl	sixth	0	0	0	0	1	0	no
3	1	low	suburban	elephant	elephant	elephant	African megafauna	mammal	1	0	girl	sixth	0	0	0	0	1	0	no
3	1	low	suburban	bear	bear	bear	bear	mammal	2	1	boy	sixth	0	0	0	0	1	0	no
3	1	low	suburban	Bucks	buck	deer	ungulate	mammal	2	1	boy	sixth	0	0	0	0	1	0	no
3	1	low	suburban	lion	lion	lion	big cat	mammal	1	0	boy	sixth	0	0	0	0	1	0	no
3	1	low	suburban	wolf	wolf	wolf	canid	mammal	1	0	boy	sixth	0	0	0	0	1	0	no
3	1	low	suburban	dogs	dog	dog	dog	mammal	3	0	girl	sixth	0	0	0	0	1	0	no
3	1	low	suburban	elephants	elephant	elephant	African megafauna	mammal	1	0	girl	sixth	0	0	0	0	1	0	no
3	1	low	suburban	horse	horse	horse	domestic ungulate	mammal	3	0	girl	sixth	0	0	0	0	1	0	no
3	1	low	suburban	pandas	panda	panda	bear	mammal	1	0	girl	sixth	0	0	0	0	1	0	no
3	1	low	suburban	cat	cat	cat	cat	mammal	3	0	boy	sixth	0	0	0	0	1	0	no
3	1	low	suburban	dog	dog	dog	dog	mammal	3	0	boy	sixth	0	0	0	0	1	0	no
3	1	low	suburban	fish	fish	fish	fish	fish	3	0	boy	sixth	0	0	0	0	1	0	no
3	1	low	suburban	bunny	rabbit	rabbit	rabbit	mammal	3	0	boy	sixth	0	0	0	0	1	0	no
3	1	low	suburban	Deer	deer	deer	ungulate	mammal	2	1	boy	sixth	0	0	1	1	0	1	no
3	1	low	suburban	Dogs	dog	dog	dog	mammal	3	0	boy	sixth	0	0	1	1	0	1	no
3	1	low	suburban	Humming Birds	hummingbird	hummingbird	songbird or parrot	bird	1	0	boy	sixth	0	0	1	1	0	1	no
3	1	low	suburban	Rabbits	rabbit	rabbit	rabbit	mammal	3	0	boy	sixth	0	0	1	1	0	1	no
3	1	low	suburban	bears	bear	bear	bear	mammal	2	1	boy	sixth	0	1	0	0	1	0	no
3	1	low	suburban	birds	bird	bird	bird	bird	3	0	boy	sixth	0	1	0	0	1	0	no
3	1	low	suburban	deer	deer	deer	ungulate	mammal	2	1	boy	sixth	0	1	0	0	1	0	no
3	1	low	suburban	squrel	squirrel	squirrel	small mammal	mammal	2	1	boy	sixth	0	1	0	0	1	0	no
3	1	low	suburban	Deer	deer	deer	ungulate	mammal	2	1	boy	sixth	0	1	0	0	0	0	no
3	1	low	suburban	Fox	fox	fox	canid	mammal	2	1	boy	sixth	0	1	0	0	0	0	no
3	1	low	suburban	Giraffes	giraffe	giraffe	African megafauna	mammal	1	0	boy	sixth	0	1	0	0	0	0	no
3	1	low	suburban	Turtle	turtle	turtle	turtle	reptile	3	0	boy	sixth	0	1	0	0	0	0	no
3	1	low	suburban	Dog	dog	dog	dog	mammal	3	0	boy	sixth	0	0	0	0	1	0	yes
3	1	low	suburban	Elephant	elephant	elephant	African megafauna	mammal	1	0	boy	sixth	0	0	0	0	1	0	yes
3	1	low	suburban	Fox	fox	fox	canid	mammal	2	1	boy	sixth	0	0	0	0	1	0	yes
3	1	low	suburban	Monkey	monkey	monkey	primate	mammal	1	0	boy	sixth	0	0	0	0	1	0	yes
3	1	low	suburban	dog	dog	dog	dog	mammal	3	0	boy	sixth	0	0	0	0	1	0	no
3	1	low	suburban	fish	fish	fish	fish	fish	3	0	boy	sixth	0	0	0	0	1	0	no
3	1	low	suburban	hipo	hippopotamus	hippopotamus	African megafauna	mammal	1	0	boy	sixth	0	0	0	0	1	0	no
3	1	low	suburban	lizard	lizard	lizard	lizard	reptile	3	0	boy	sixth	0	0	0	0	1	0	no
3	1	low	suburban	bears	bear	bear	bear	mammal	2	1	boy	sixth	0	0	0	0	1	0	no
3	1	low	suburban	snakes	snake	snake	snake	reptile	3	0	boy	sixth	0	0	0	0	1	0	no
3	1	low	suburban	spiders	spider	spider	arachnid	terrestrial invertebrate	2	0	boy	sixth	0	0	0	0	1	0	no
3	1	low	suburban	Stray Cat	stray cat	cat	cat	mammal	3	0	girl	sixth	0	0	0	0	1	0	no
3	1	low	suburban	Deer	deer	deer	ungulate	mammal	2	1	girl	sixth	0	0	0	0	1	0	no
3	1	low	suburban	Fox	fox	fox	canid	mammal	2	1	girl	sixth	0	0	0	0	1	0	no
3	1	low	suburban	Bunny	rabbit	rabbit	rabbit	mammal	3	0	girl	sixth	0	0	0	0	1	0	no
3	1	low	suburban	deer	deer	deer	ungulate	mammal	2	1	girl	sixth	0	0	0	0	1	0	no
3	1	low	suburban	dog	dog	dog	dog	mammal	3	0	girl	sixth	0	0	0	0	1	0	no
3	1	low	suburban	dolphin	dolphin	dolphin	marine mammal	mammal	1	0	girl	sixth	0	0	0	0	1	0	no
3	1	low	suburban	mouse	mouse	mouse	small mammal	mammal	1	0	girl	sixth	0	0	0	0	1	0	no
3	1	low	suburban	ceeta	cheetah	cheetah	felid	mammal	1	0	no response	sixth	0	0	0	0	1	0	no response
3	1	low	suburban	hammer head shark	hammerhead shark	hammerhead shark	shark	fish	1	0	no response	sixth	0	0	0	0	1	0	no response
3	1	low	suburban	octipus	octopus	octopus	marine invertebrate	marine invertebrate	1	0	no response	sixth	0	0	0	0	1	0	no response
3	1	low	suburban	Bears	bear	bear	bear	mammal	2	1	boy	sixth	0	0	0	0	1	0	no
3	1	low	suburban	Deers	deer	deer	ungulate	mammal	2	1	boy	sixth	0	0	0	0	1	0	no
3	1	low	suburban	Dogs	dog	dog	dog	mammal	3	0	boy	sixth	0	0	0	0	1	0	no
3	1	low	suburban	Snakes	snake	snake	snake	reptile	3	0	boy	sixth	0	0	0	0	1	0	no
3	1	low	suburban	birds	bird	bird	bird	bird	3	0	girl	sixth	0	0	0	0	1	0	no
3	1	low	suburban	kittens	baby cat	cat	cat	mammal	3	0	girl	sixth	0	0	0	0	1	0	no
3	1	low	suburban	puppies	baby dog	dog	dog	mammal	3	0	girl	sixth	0	0	0	0	1	0	no
3	1	low	suburban	baby lizards	baby lizard	lizard	lizard	reptile	3	1	girl	sixth	0	0	0	0	1	0	no
3	1	low	suburban	cats	cat	cat	cat	mammal	3	0	boy	sixth	0	0	0	0	1	0	no
3	1	low	suburban	dogs	dog	dog	dog	mammal	3	0	boy	sixth	0	0	0	0	1	0	no
3	1	low	suburban	hamsters	hamster	hamster	small mammal	mammal	3	0	boy	sixth	0	0	0	0	1	0	no
3	1	low	suburban	bunnies	rabbit	rabbit	rabbit	mammal	3	0	boy	sixth	0	0	0	0	1	0	no
3	1	low	suburban	cheetah	cheetah	cheetah	felid	mammal	1	0	girl	sixth	0	0	0	0	1	0	yes
3	1	low	suburban	Dogs	dog	dog	dog	mammal	3	0	girl	sixth	0	0	0	0	1	0	yes
3	1	low	suburban	Ginny Pigs	guinea pig	guinea pig	small mammal	mammal	3	0	girl	sixth	0	0	0	0	1	0	yes
3	1	low	suburban	Moose	moose	moose	ungulate	mammal	1	0	girl	sixth	0	0	0	0	1	0	yes
3	1	low	suburban	Dog	dog	dog	dog	mammal	3	0	boy	sixth	0	0	0	0	0	1	no
3	1	low	suburban	Rinoccerous	rhinoceros	rhinoceros	African megafauna	mammal	1	0	boy	sixth	0	0	0	0	0	1	no
3	1	low	suburban	Tiger	tiger	tiger	big cat	mammal	1	0	boy	sixth	0	0	0	0	0	1	no
3	1	low	suburban	Wolf	wolf	wolf	canid	mammal	1	0	boy	sixth	0	0	0	0	0	1	no
3	1	low	suburban	Birds	bird	bird	bird	bird	3	0	girl	sixth	0	0	0	0	1	0	no
3	1	low	suburban	Cats	cat	cat	cat	mammal	3	0	girl	sixth	0	0	0	0	1	0	no
3	1	low	suburban	Fish	fish	fish	fish	fish	3	0	girl	sixth	0	0	0	0	1	0	no
3	1	low	suburban	Hampsters	hamster	hamster	small mammal	mammal	3	0	girl	sixth	0	0	0	0	1	0	no
3	1	low	suburban	dog	dog	dog	dog	mammal	3	0	boy	sixth	0	0	0	0	1	0	no
3	1	low	suburban	lizard	lizard	lizard	lizard	reptile	3	0	boy	sixth	0	0	0	0	1	0	no
3	1	low	suburban	bunny	rabbit	rabbit	rabbit	mammal	3	0	boy	sixth	0	0	0	0	1	0	no
3	1	low	suburban	snake	snake	snake	snake	reptile	3	0	boy	sixth	0	0	0	0	1	0	no
3	1	low	suburban	coyote	coyote	coyote	canid	mammal	0	1	boy	sixth	0	0	0	0	1	0	yes
3	1	low	suburban	deer	deer	deer	ungulate	mammal	2	1	boy	sixth	0	0	0	0	1	0	yes
3	1	low	suburban	dogs	dog	dog	dog	mammal	3	0	boy	sixth	0	0	0	0	1	0	yes
3	1	low	suburban	squarl	squirrel	squirrel	small mammal	mammal	2	1	boy	sixth	0	0	0	0	1	0	yes
3	1	low	suburban	bob cat	bobcat	bobcat	felid	mammal	0	1	girl	sixth	0	0	0	0	1	0	no
3	1	low	suburban	kitten	baby cat	cat	cat	mammal	3	0	girl	sixth	0	0	0	0	1	0	no
3	1	low	suburban	puppy	baby dog	dog	dog	mammal	3	0	girl	sixth	0	0	0	0	1	0	no
3	1	low	suburban	panda	panda	panda	bear	mammal	1	0	girl	sixth	0	0	0	0	1	0	no
3	1	low	suburban	kittens	baby cat	cat	cat	mammal	3	0	girl	sixth	0	0	0	0	1	0	no
3	1	low	suburban	dogs	dog	dog	dog	mammal	3	0	girl	sixth	0	0	0	0	1	0	no
3	1	low	suburban	dolfins	dolphin	dolphin	marine mammal	mammal	1	0	girl	sixth	0	0	0	0	1	0	no
3	1	low	suburban	turtles	turtle	turtle	turtle	reptile	3	0	girl	sixth	0	0	0	0	1	0	no
3	1	low	suburban	dog	dog	dog	dog	mammal	3	0	girl	sixth	0	0	1	0	0	0	no
3	1	low	suburban	giraffie	giraffe	giraffe	African megafauna	mammal	1	0	girl	sixth	0	0	1	0	0	0	no
3	1	low	suburban	horse	horse	horse	domestic ungulate	mammal	3	0	girl	sixth	0	0	1	0	0	0	no
3	1	low	suburban	ponny	pony	pony	domestic ungulate	mammal	3	0	girl	sixth	0	0	1	0	0	0	no
3	1	low	suburban	cat	cat	cat	cat	mammal	3	0	boy	sixth	0	0	0	0	1	0	no
3	1	low	suburban	cats	cat	cat	cat	mammal	3	0	boy	sixth	0	0	0	0	1	0	no
3	1	low	suburban	dog	dog	dog	dog	mammal	3	0	boy	sixth	0	0	0	0	1	0	no
3	1	low	suburban	dogs	dog	dog	dog	mammal	3	0	boy	sixth	0	0	0	0	1	0	no
3	1	low	suburban	cat	cat	cat	cat	mammal	3	0	girl	sixth	0	0	0	0	1	0	no
3	1	low	suburban	dog	dog	dog	dog	mammal	3	0	girl	sixth	0	0	0	0	1	0	no
3	1	low	suburban	monkeys	monkey	monkey	primate	mammal	1	0	girl	sixth	0	0	0	0	1	0	no
3	1	low	suburban	squirrels	squirrel	squirrel	small mammal	mammal	2	1	girl	sixth	0	0	0	0	1	0	no
3	1	low	suburban	bears	bear	bear	bear	mammal	2	1	girl	sixth	0	0	0	0	1	0	no
3	1	low	suburban	chipmunks	chipmunk	chipmunk	small mammal	mammal	2	1	girl	sixth	0	0	0	0	1	0	no
3	1	low	suburban	fox	fox	fox	canid	mammal	2	1	girl	sixth	0	0	0	0	1	0	no
3	1	low	suburban	groundhogs	groundhog	groundhog	small mammal	mammal	0	1	girl	sixth	0	0	0	0	1	0	no
3	1	low	suburban	Ants	ant	ant	insect	terrestrial invertebrate	2	1	boy	sixth	0	0	0	0	1	0	no
3	1	low	suburban	Buffalo	buffalo	buffalo	ungulate	mammal	2	1	boy	sixth	0	0	0	0	1	0	no
3	1	low	suburban	Snake	snake	snake	snake	reptile	3	0	boy	sixth	0	0	0	0	1	0	no
3	1	low	suburban	spider	spider	spider	arachnid	terrestrial invertebrate	2	0	boy	sixth	0	0	0	0	1	0	no
3	1	low	suburban	deer	deer	deer	ungulate	mammal	2	1	boy	sixth	0	0	0	0	1	0	no response
3	1	low	suburban	Dolefens	dolphin	dolphin	marine mammal	mammal	1	0	boy	sixth	0	0	0	0	1	0	no response
3	1	low	suburban	lion	lion	lion	big cat	mammal	1	0	boy	sixth	0	0	0	0	1	0	no response
3	1	low	suburban	snaks	snake	snake	snake	reptile	3	0	boy	sixth	0	0	0	0	1	0	no response
3	1	low	suburban	dog	dog	dog	dog	mammal	3	0	girl	sixth	0	0	0	0	1	0	no
3	1	low	suburban	panda	panda	panda	bear	mammal	1	0	girl	sixth	0	0	0	0	1	0	no
3	1	low	suburban	pig	pig	pig	domestic ungulate	mammal	3	0	girl	sixth	0	0	0	0	1	0	no
3	1	low	suburban	zebra	zebra	zebra	ungulate	mammal	1	0	girl	sixth	0	0	0	0	1	0	no
3	1	low	suburban	cats	cat	cat	cat	mammal	3	0	girl	sixth	0	0	0	0	1	0	no
3	1	low	suburban	dogs	dog	dog	dog	mammal	3	0	girl	sixth	0	0	0	0	1	0	no
3	1	low	suburban	hermit crabs	hermit crab	hermit crab	marine invertebrate	marine invertebrate	1	0	girl	sixth	0	0	0	0	1	0	no
3	1	low	suburban	horses	horse	horse	domestic ungulate	mammal	3	0	girl	sixth	0	0	0	0	1	0	no
3	1	low	suburban	cat	cat	cat	cat	mammal	3	0	boy	sixth	0	0	0	0	1	0	no
3	1	low	suburban	deer	deer	deer	ungulate	mammal	2	1	boy	sixth	0	0	0	0	1	0	no
3	1	low	suburban	dog	dog	dog	dog	mammal	3	0	boy	sixth	0	0	0	0	1	0	no
3	1	low	suburban	wolf	wolf	wolf	canid	mammal	1	0	boy	sixth	0	0	0	0	1	0	no
3	1	low	suburban	deer	deer	deer	ungulate	mammal	2	1	boy	sixth	0	0	0	0	1	0	no
3	1	low	suburban	dog	dog	dog	dog	mammal	3	0	boy	sixth	0	0	0	0	1	0	no
3	1	low	suburban	moose	moose	moose	ungulate	mammal	1	0	boy	sixth	0	0	0	0	1	0	no
3	1	low	suburban	rabbit	rabbit	rabbit	rabbit	mammal	3	0	boy	sixth	0	0	0	0	1	0	no
3	1	low	suburban	deer	deer	deer	ungulate	mammal	2	1	girl	sixth	0	0	0	0	1	0	no
3	1	low	suburban	hedghog	hedgehog	hedgehog	small mammal	mammal	1	0	girl	sixth	0	0	0	0	1	0	no
3	1	low	suburban	bunnys	rabbit	rabbit	rabbit	mammal	3	0	girl	sixth	0	0	0	0	1	0	no
3	1	low	suburban	sloths	sloth	sloth	anteater, sloth, armadillo	mammal	1	0	girl	sixth	0	0	0	0	1	0	no
3	1	low	suburban	dog	dog	dog	dog	mammal	3	0	girl	sixth	0	0	0	0	1	0	no
3	1	low	suburban	kangaroo	kangaroo	kangaroo	marsupial	mammal	1	0	girl	sixth	0	0	0	0	1	0	no
3	1	low	suburban	monkey	monkey	monkey	primate	mammal	1	0	girl	sixth	0	0	0	0	1	0	no
3	1	low	suburban	pig	pig	pig	domestic ungulate	mammal	3	0	girl	sixth	0	0	0	0	1	0	no
3	1	low	suburban	frog	frog	frog	amphibian	amphibian	2	0	boy	sixth	0	0	1	0	0	0	no
3	1	low	suburban	liger	liger	liger	big cat	mammal	1	0	boy	sixth	0	0	1	0	0	0	no
3	1	low	suburban	praying mantis	praying mantis	praying mantis	insect	terrestrial invertebrate	2	1	boy	sixth	0	0	1	0	0	0	no
3	1	low	suburban	Bobcat	bobcat	bobcat	felid	mammal	0	1	girl	sixth	0	0	0	0	1	0	no
3	1	low	suburban	Elephant	elephant	elephant	African megafauna	mammal	1	0	girl	sixth	0	0	0	0	1	0	no
3	1	low	suburban	Pufferfish	pufferfish	pufferfish	fish	fish	1	0	girl	sixth	0	0	0	0	1	0	no
3	1	low	suburban	Rhino	rhinoceros	rhinoceros	African megafauna	mammal	1	0	girl	sixth	0	0	0	0	1	0	no
3	1	low	suburban	dog	dog	dog	dog	mammal	3	0	girl	sixth	0	0	0	0	1	0	no
3	1	low	suburban	elephant	elephant	elephant	African megafauna	mammal	1	0	girl	sixth	0	0	0	0	1	0	no
3	1	low	suburban	giraffe	giraffe	giraffe	African megafauna	mammal	1	0	girl	sixth	0	0	0	0	1	0	no
3	1	low	suburban	zebra	zebra	zebra	ungulate	mammal	1	0	girl	sixth	0	0	0	0	1	0	no
3	1	low	suburban	leopard	leopard	leopard	big cat	mammal	1	0	boy	sixth	0	0	0	0	1	0	no
3	1	low	suburban	lions	lion	lion	big cat	mammal	1	0	boy	sixth	0	0	0	0	1	0	no
3	1	low	suburban	snakes	snake	snake	snake	reptile	3	0	boy	sixth	0	0	0	0	1	0	no
3	1	low	suburban	tigers	tiger	tiger	big cat	mammal	1	0	boy	sixth	0	0	0	0	1	0	no
3	1	low	suburban	dog bunny wolfves coytes	dog	dog	dog	mammal	3	0	girl	sixth	0	0	0	0	1	0	no
3	1	low	suburban	dog bunny/rabbit wolfves	dog	dog	dog	mammal	3	0	girl	sixth	0	0	0	0	1	0	no
3	1	low	suburban	dog panda deer baby deer	dog	dog	dog	mammal	3	0	girl	sixth	0	0	0	0	1	0	no
3	1	low	suburban	horse dog panda peacokk	horse	horse	domestic ungulate	mammal	3	0	girl	sixth	0	0	0	0	1	0	no
3	1	low	suburban	Betta's	betta fish	betta fish	fish	fish	1	0	girl	sixth	0	0	0	0	1	0	no
3	1	low	suburban	Cats	cat	cat	cat	mammal	3	0	girl	sixth	0	0	0	0	1	0	no
3	1	low	suburban	Dogs	dog	dog	dog	mammal	3	0	girl	sixth	0	0	0	0	1	0	no
3	1	low	suburban	hamsters	hamster	hamster	small mammal	mammal	3	0	girl	sixth	0	0	0	0	1	0	no
3	1	low	suburban	cat	cat	cat	cat	mammal	3	0	girl	sixth	0	0	0	0	1	0	no
3	1	low	suburban	crab	crab	crab	marine invertebrate	marine invertebrate	2	1	girl	sixth	0	0	0	0	1	0	no
3	1	low	suburban	dog	dog	dog	dog	mammal	3	0	girl	sixth	0	0	0	0	1	0	no
3	1	low	suburban	monkey	monkey	monkey	primate	mammal	1	0	girl	sixth	0	0	0	0	1	0	no
3	1	low	suburban	bear cubs	baby bear	bear	bear	mammal	2	1	girl	sixth	0	0	0	0	1	0	no
3	1	low	suburban	cyotes	coyote	coyote	canid	mammal	0	1	girl	sixth	0	0	0	0	1	0	no
3	1	low	suburban	deer	deer	deer	ungulate	mammal	2	1	girl	sixth	0	0	0	0	1	0	no
3	1	low	suburban	rabbits	rabbit	rabbit	rabbit	mammal	3	0	girl	sixth	0	0	0	0	1	0	no
3	1	low	suburban	Nice Dogs	nice dog	dog	dog	mammal	3	0	girl	sixth	0	0	0	0	1	0	no
3	1	low	suburban	Giraffe	giraffe	giraffe	African megafauna	mammal	1	0	girl	sixth	0	0	0	0	1	0	no
3	1	low	suburban	Monkeys	monkey	monkey	primate	mammal	1	0	girl	sixth	0	0	0	0	1	0	no
3	1	low	suburban	Zebra	zebra	zebra	ungulate	mammal	1	0	girl	sixth	0	0	0	0	1	0	no
3	1	low	suburban	Cat	cat	cat	cat	mammal	3	0	girl	sixth	0	0	0	0	1	0	no
3	1	low	suburban	Dog	dog	dog	dog	mammal	3	0	girl	sixth	0	0	0	0	1	0	no
3	1	low	suburban	Kinkajou	kinkajou	kinkajou	other carnivore	mammal	1	0	girl	sixth	0	0	0	0	1	0	no
3	1	low	suburban	Sloth	sloth	sloth	anteater, sloth, armadillo	mammal	1	0	girl	sixth	0	0	0	0	1	0	no
3	1	low	suburban	cats	cat	cat	cat	mammal	3	0	girl	sixth	0	0	0	0	1	0	yes
3	1	low	suburban	dogs	dog	dog	dog	mammal	3	0	girl	sixth	0	0	0	0	1	0	yes
3	1	low	suburban	monkes	monkey	monkey	primate	mammal	1	0	girl	sixth	0	0	0	0	1	0	yes
3	1	low	suburban	bunneys	rabbit	rabbit	rabbit	mammal	3	0	girl	sixth	0	0	0	0	1	0	yes
3	1	low	suburban	bears	bear	bear	bear	mammal	2	1	girl	sixth	0	0	0	0	1	0	no
3	1	low	suburban	cats	cat	cat	cat	mammal	3	0	girl	sixth	0	0	0	0	1	0	no
3	1	low	suburban	dogs	dog	dog	dog	mammal	3	0	girl	sixth	0	0	0	0	1	0	no
3	1	low	suburban	panda	panda	panda	bear	mammal	1	0	girl	sixth	0	0	0	0	1	0	no
3	1	low	suburban	Gorila	gorilla	gorilla	primate	mammal	1	0	boy	sixth	0	0	0	0	1	0	yes
3	1	low	suburban	Hamsters	hamster	hamster	small mammal	mammal	3	0	boy	sixth	0	0	0	0	1	0	yes
3	1	low	suburban	lizars	lizard	lizard	lizard	reptile	3	0	boy	sixth	0	0	0	0	1	0	yes
3	1	low	suburban	snakes	snake	snake	snake	reptile	3	0	boy	sixth	0	0	0	0	1	0	yes
3	1	low	suburban	All types of Bears	all bears	bear	bear	mammal	2	1	girl	sixth	0	0	0	0	1	0	no
3	1	low	suburban	Octopus	octopus	octopus	marine invertebrate	marine invertebrate	1	0	girl	sixth	0	0	0	0	1	0	no
3	1	low	suburban	Tiger	tiger	tiger	big cat	mammal	1	0	girl	sixth	0	0	0	0	1	0	no
3	1	low	suburban	Zebra	zebra	zebra	ungulate	mammal	1	0	girl	sixth	0	0	0	0	1	0	no
3	1	low	suburban	cheta	cheetah	cheetah	felid	mammal	1	0	boy	sixth	0	0	0	0	1	0	no
3	1	low	suburban	puma	cougar	cougar	big cat	mammal	1	0	boy	sixth	0	0	0	0	1	0	no
3	1	low	suburban	dog	dog	dog	dog	mammal	3	0	boy	sixth	0	0	0	0	1	0	no
3	1	low	suburban	eagle	eagle	eagle	raptor or owl	bird	2	1	boy	sixth	0	0	0	0	1	0	no
3	1	low	suburban	birds	bird	bird	bird	bird	3	0	girl	sixth	0	0	0	0	1	0	no
3	1	low	suburban	cats	cat	cat	cat	mammal	3	0	girl	sixth	0	0	0	0	1	0	no
3	1	low	suburban	cheetah	cheetah	cheetah	felid	mammal	1	0	girl	sixth	0	0	0	0	1	0	no
3	1	low	suburban	dogs	dog	dog	dog	mammal	3	0	girl	sixth	0	0	0	0	1	0	no
3	1	low	suburban	cat	cat	cat	cat	mammal	3	0	boy	sixth	0	0	0	0	1	0	yes
3	1	low	suburban	dog	dog	dog	dog	mammal	3	0	boy	sixth	0	0	0	0	1	0	yes
3	1	low	suburban	fish	fish	fish	fish	fish	3	0	boy	sixth	0	0	0	0	1	0	yes
3	1	low	suburban	horse	horse	horse	domestic ungulate	mammal	3	0	boy	sixth	0	0	0	0	1	0	yes
3	1	low	suburban	cat	cat	cat	cat	mammal	3	0	boy	sixth	0	0	1	0	0	0	yes
3	1	low	suburban	dog	dog	dog	dog	mammal	3	0	boy	sixth	0	0	1	0	0	0	yes
3	1	low	suburban	liziard	lizard	lizard	lizard	reptile	3	0	boy	sixth	0	0	1	0	0	0	yes
3	1	low	suburban	monkey	monkey	monkey	primate	mammal	1	0	boy	sixth	0	0	1	0	0	0	yes
3	1	low	suburban	bird	bird	bird	bird	bird	3	0	boy	sixth	0	0	0	0	1	0	no
3	1	low	suburban	cat	cat	cat	cat	mammal	3	0	boy	sixth	0	0	0	0	1	0	no
3	1	low	suburban	dog	dog	dog	dog	mammal	3	0	boy	sixth	0	0	0	0	1	0	no
3	1	low	suburban	wolf	wolf	wolf	canid	mammal	1	0	boy	sixth	0	0	0	0	1	0	no
3	1	low	suburban	husky	Siberian husky	dog	dog	mammal	3	0	boy	sixth	0	0	0	0	1	0	no
3	1	low	suburban	panther	panther	panther	big cat	mammal	1	0	boy	sixth	0	0	0	0	1	0	no
3	1	low	suburban	tiger	tiger	tiger	big cat	mammal	1	0	boy	sixth	0	0	0	0	1	0	no
3	1	low	suburban	wolf	wolf	wolf	canid	mammal	1	0	boy	sixth	0	0	0	0	1	0	no
3	1	low	suburban	birds	bird	bird	bird	bird	3	0	girl	sixth	0	0	0	0	1	0	yes
3	1	low	suburban	dogs	dog	dog	dog	mammal	3	0	girl	sixth	0	0	0	0	1	0	yes
3	1	low	suburban	pandas	panda	panda	bear	mammal	1	0	girl	sixth	0	0	0	0	1	0	yes
3	1	low	suburban	wolves	wolf	wolf	canid	mammal	1	0	girl	sixth	0	0	0	0	1	0	yes
3	1	low	suburban	Dogs	dog	dog	dog	mammal	3	0	girl	sixth	0	0	0	0	1	0	no
3	1	low	suburban	Elephants	elephant	elephant	African megafauna	mammal	1	0	girl	sixth	0	0	0	0	1	0	no
3	1	low	suburban	monkeys	monkey	monkey	primate	mammal	1	0	girl	sixth	0	0	0	0	1	0	no
3	1	low	suburban	bunnies	rabbit	rabbit	rabbit	mammal	3	0	girl	sixth	0	0	0	0	1	0	no
3	1	low	suburban	deer	deer	deer	ungulate	mammal	2	1	boy	sixth	0	0	0	0	1	0	yes
3	1	low	suburban	lynx	lynx	lynx	felid	mammal	1	0	boy	sixth	0	0	0	0	1	0	yes
3	1	low	suburban	snakes	snake	snake	snake	reptile	3	0	boy	sixth	0	0	0	0	1	0	yes
3	1	low	suburban	wolf	wolf	wolf	canid	mammal	1	0	boy	sixth	0	0	0	0	1	0	yes
3	1	low	suburban	birds	bird	bird	bird	bird	3	0	girl	sixth	0	0	0	0	1	0	no
3	1	low	suburban	Deer	deer	deer	ungulate	mammal	2	1	girl	sixth	0	0	0	0	1	0	no
3	1	low	suburban	Dogs but there probably not in the forest	dog	dog	dog	mammal	3	0	girl	sixth	0	0	0	0	1	0	no
3	1	low	suburban	squirles	squirrel	squirrel	small mammal	mammal	2	1	girl	sixth	0	0	0	0	1	0	no
3	1	low	suburban	Chimpanzee	chimpanzee	chimpanzee	primate	mammal	1	0	boy	sixth	0	1	0	0	0	0	no
3	1	low	suburban	Gorilla	gorilla	gorilla	primate	mammal	1	0	boy	sixth	0	1	0	0	0	0	no
3	1	low	suburban	Lions	lion	lion	big cat	mammal	1	0	boy	sixth	0	1	0	0	0	0	no
3	1	low	suburban	Tigers	tiger	tiger	big cat	mammal	1	0	boy	sixth	0	1	0	0	0	0	no
3	1	low	suburban	Cats	cat	cat	cat	mammal	3	0	boy	sixth	0	0	0	0	1	0	yes
3	1	low	suburban	Fox	fox	fox	canid	mammal	2	1	boy	sixth	0	0	0	0	1	0	yes
3	1	low	suburban	Penguin	penguin	penguin	aquatic bird	bird	1	0	boy	sixth	0	0	0	0	1	0	yes
3	1	low	suburban	Shark	shark	shark	shark	fish	1	0	boy	sixth	0	0	0	0	1	0	yes
3	1	low	suburban	cats	cat	cat	cat	mammal	3	0	girl	sixth	0	0	0	0	1	0	no
3	1	low	suburban	dogs	dog	dog	dog	mammal	3	0	girl	sixth	0	0	0	0	1	0	no
3	1	low	suburban	ginny pigs	guinea pig	guinea pig	small mammal	mammal	3	0	girl	sixth	0	0	0	0	1	0	no
3	1	low	suburban	bunnys	rabbit	rabbit	rabbit	mammal	3	0	girl	sixth	0	0	0	0	1	0	no
3	1	low	suburban	cat	cat	cat	cat	mammal	3	0	boy	sixth	0	0	0	0	1	0	no
3	1	low	suburban	Dog	dog	dog	dog	mammal	3	0	boy	sixth	0	0	0	0	1	0	no
3	1	low	suburban	whale	whale	whale	marine mammal	mammal	1	0	boy	sixth	0	0	0	0	1	0	no
3	1	low	suburban	Zebra	zebra	zebra	ungulate	mammal	1	0	boy	sixth	0	0	0	0	1	0	no
3	1	low	suburban	Cats	cat	cat	cat	mammal	3	0	boy	sixth	0	0	0	0	1	0	no
3	1	low	suburban	Dogs	dog	dog	dog	mammal	3	0	boy	sixth	0	0	0	0	1	0	no
3	1	low	suburban	Pandas	panda	panda	bear	mammal	1	0	boy	sixth	0	0	0	0	1	0	no
3	1	low	suburban	Pigs	pig	pig	domestic ungulate	mammal	3	0	boy	sixth	0	0	0	0	1	0	no
3	1	low	suburban	Dogs	dog	dog	dog	mammal	3	0	girl	sixth	0	0	0	0	1	0	no
3	1	low	suburban	Horses	horse	horse	domestic ungulate	mammal	3	0	girl	sixth	0	0	0	0	1	0	no
3	1	low	suburban	Baby Pandas	baby panda	panda	bear	mammal	1	0	girl	sixth	0	0	0	0	1	0	no
3	1	low	suburban	Seals	seal	seal	marine mammal	mammal	1	0	girl	sixth	0	0	0	0	1	0	no
3	1	low	suburban	Horned lizard	horned lizard	horned lizard	lizard	reptile	1	0	boy	sixth	0	0	0	0	1	0	no
3	1	low	suburban	spider	spider	spider	arachnid	terrestrial invertebrate	2	0	boy	sixth	0	0	0	0	1	0	no
3	1	low	suburban	tiger	tiger	tiger	big cat	mammal	1	0	boy	sixth	0	0	0	0	1	0	no
3	1	low	suburban	tutle	turtle	turtle	turtle	reptile	3	0	boy	sixth	0	0	0	0	1	0	no
3	1	low	suburban	bird	bird	bird	bird	bird	3	0	boy	sixth	0	0	0	1	1	0	no
3	1	low	suburban	cat	cat	cat	cat	mammal	3	0	boy	sixth	0	0	0	1	1	0	no
3	1	low	suburban	dog	dog	dog	dog	mammal	3	0	boy	sixth	0	0	0	1	1	0	no
3	1	low	suburban	rabit	rabbit	rabbit	rabbit	mammal	3	0	boy	sixth	0	0	0	1	1	0	no
3	1	low	suburban	bird	bird	bird	bird	bird	3	0	boy	sixth	0	0	0	0	1	0	no
3	1	low	suburban	cat	cat	cat	cat	mammal	3	0	boy	sixth	0	0	0	0	1	0	no
3	1	low	suburban	Dog	dog	dog	dog	mammal	3	0	boy	sixth	0	0	0	0	1	0	no
3	1	low	suburban	hampster	hamster	hamster	small mammal	mammal	3	0	boy	sixth	0	0	0	0	1	0	no
3	1	low	suburban	Bobcat	bobcat	bobcat	felid	mammal	0	1	girl	sixth	0	0	0	0	1	0	no
3	1	low	suburban	Dogs	dog	dog	dog	mammal	3	0	girl	sixth	0	0	0	0	1	0	no
3	1	low	suburban	Pandas	panda	panda	bear	mammal	1	0	girl	sixth	0	0	0	0	1	0	no
3	1	low	suburban	Bunnys	rabbit	rabbit	rabbit	mammal	3	0	girl	sixth	0	0	0	0	1	0	no
3	1	low	suburban	Dogs	dog	dog	dog	mammal	3	0	girl	sixth	0	0	0	0	0	1	no
3	1	low	suburban	Horse	horse	horse	domestic ungulate	mammal	3	0	girl	sixth	0	0	0	0	0	1	no
3	1	low	suburban	ponys	pony	pony	domestic ungulate	mammal	3	0	girl	sixth	0	0	0	0	0	1	no
3	1	low	suburban	whales	whale	whale	marine mammal	mammal	1	0	girl	sixth	0	0	0	0	0	1	no
3	1	low	suburban	Cat	cat	cat	cat	mammal	3	0	boy	sixth	0	0	0	0	1	0	yes
3	1	low	suburban	Dog	dog	dog	dog	mammal	3	0	boy	sixth	0	0	0	0	1	0	yes
3	1	low	suburban	Great White Shark	great white shark	great white shark	shark	fish	1	0	boy	sixth	0	0	0	0	1	0	yes
3	1	low	suburban	Turtale	turtle	turtle	turtle	reptile	3	0	boy	sixth	0	0	0	0	1	0	yes
3	1	low	suburban	cat	cat	cat	cat	mammal	3	0	boy	sixth	0	0	0	0	1	0	no
3	1	low	suburban	dog	dog	dog	dog	mammal	3	0	boy	sixth	0	0	0	0	1	0	no
3	1	low	suburban	fish	fish	fish	fish	fish	3	0	boy	sixth	0	0	0	0	1	0	no
3	1	low	suburban	owl	owl	owl	raptor or owl	bird	2	1	boy	sixth	0	0	0	0	1	0	no
3	1	low	suburban	deer	deer	deer	ungulate	mammal	2	1	boy	sixth	0	0	0	0	1	0	yes
3	1	low	suburban	dogs	dog	dog	dog	mammal	3	0	boy	sixth	0	0	0	0	1	0	yes
3	1	low	suburban	gorrilla	gorilla	gorilla	primate	mammal	1	0	boy	sixth	0	0	0	0	1	0	yes
3	1	low	suburban	monkey	monkey	monkey	primate	mammal	1	0	boy	sixth	0	0	0	0	1	0	yes
3	1	low	suburban	cat	cat	cat	cat	mammal	3	0	boy	sixth	0	0	0	0	1	0	no
3	1	low	suburban	dog	dog	dog	dog	mammal	3	0	boy	sixth	0	0	0	0	1	0	no
3	1	low	suburban	fish	fish	fish	fish	fish	3	0	boy	sixth	0	0	0	0	1	0	no
3	1	low	suburban	wolf	wolf	wolf	canid	mammal	1	0	boy	sixth	0	0	0	0	1	0	no
3	1	low	suburban	cat	cat	cat	cat	mammal	3	0	girl	sixth	0	0	0	0	1	0	no
3	1	low	suburban	dog	dog	dog	dog	mammal	3	0	girl	sixth	0	0	0	0	1	0	no
3	1	low	suburban	hampster	hamster	hamster	small mammal	mammal	3	0	girl	sixth	0	0	0	0	1	0	no
3	1	low	suburban	bunny	rabbit	rabbit	rabbit	mammal	3	0	girl	sixth	0	0	0	0	1	0	no
3	1	low	suburban	deer	deer	deer	ungulate	mammal	2	1	boy	sixth	0	0	0	0	1	0	no
3	1	low	suburban	dogs	dog	dog	dog	mammal	3	0	boy	sixth	0	0	0	0	1	0	no
3	1	low	suburban	rabbits	rabbit	rabbit	rabbit	mammal	3	0	boy	sixth	0	0	0	0	1	0	no
3	1	low	suburban	salmon	salmon	salmon	fish	fish	1	0	boy	sixth	0	0	0	0	1	0	no
3	1	low	suburban	dog	dog	dog	dog	mammal	3	0	boy	sixth	0	0	0	0	1	0	yes
3	1	low	suburban	monkey	monkey	monkey	primate	mammal	1	0	boy	sixth	0	0	0	0	1	0	yes
3	1	low	suburban	panda	panda	panda	bear	mammal	1	0	boy	sixth	0	0	0	0	1	0	yes
3	1	low	suburban	zeba	zebra	zebra	ungulate	mammal	1	0	boy	sixth	0	0	0	0	1	0	yes
3	1	low	suburban	hiena	hyena	hyena	other carnivore	mammal	1	0	boy	sixth	0	0	0	0	1	0	yes
3	1	low	suburban	kangroo	kangaroo	kangaroo	marsupial	mammal	1	0	boy	sixth	0	0	0	0	1	0	yes
3	1	low	suburban	panda	panda	panda	bear	mammal	1	0	boy	sixth	0	0	0	0	1	0	yes
3	1	low	suburban	bunny	rabbit	rabbit	rabbit	mammal	3	0	boy	sixth	0	0	0	0	1	0	yes
3	1	low	suburban	coyote	coyote	coyote	canid	mammal	0	1	boy	sixth	0	0	0	0	1	0	no
3	1	low	suburban	lion	lion	lion	big cat	mammal	1	0	boy	sixth	0	0	0	0	1	0	no
3	1	low	suburban	snake	snake	snake	snake	reptile	3	0	boy	sixth	0	0	0	0	1	0	no
3	1	low	suburban	wolf	wolf	wolf	canid	mammal	1	0	boy	sixth	0	0	0	0	1	0	no
3	1	low	suburban	cat	cat	cat	cat	mammal	3	0	boy	sixth	0	0	0	0	0	1	no
3	1	low	suburban	dog	dog	dog	dog	mammal	3	0	boy	sixth	0	0	0	0	0	1	no
3	1	low	suburban	fish	fish	fish	fish	fish	3	0	boy	sixth	0	0	0	0	0	1	no
3	1	low	suburban	horse	horse	horse	domestic ungulate	mammal	3	0	boy	sixth	0	0	0	0	0	1	no
3	1	low	suburban	dog	dog	dog	dog	mammal	3	0	boy	sixth	0	0	0	0	1	0	no
3	1	low	suburban	genia pig	guinea pig	guinea pig	small mammal	mammal	3	0	boy	sixth	0	0	0	0	1	0	no
3	1	low	suburban	penguin	penguin	penguin	aquatic bird	bird	1	0	boy	sixth	0	0	0	0	1	0	no
3	1	low	suburban	rabbit	rabbit	rabbit	rabbit	mammal	3	0	boy	sixth	0	0	0	0	1	0	no
3	1	low	suburban	cats	cat	cat	cat	mammal	3	0	girl	sixth	0	0	0	0	1	0	no
3	1	low	suburban	dogs	dog	dog	dog	mammal	3	0	girl	sixth	0	0	0	0	1	0	no
3	1	low	suburban	gerbils	gerbil	gerbil	small mammal	mammal	3	0	girl	sixth	0	0	0	0	1	0	no
3	1	low	suburban	zebras	zebra	zebra	ungulate	mammal	1	0	girl	sixth	0	0	0	0	1	0	no
3	1	low	suburban	cat fox panda dog	cat	cat	cat	mammal	3	0	boy	sixth	0	0	0	0	1	0	no
3	1	low	suburban	dog cat fox panda	dog	dog	dog	mammal	3	0	boy	sixth	0	0	0	0	1	0	no
3	1	low	suburban	dog cat panda fox	dog	dog	dog	mammal	3	0	boy	sixth	0	0	0	0	1	0	no
3	1	low	suburban	dog fox panda cat	dog	dog	dog	mammal	3	0	boy	sixth	0	0	0	0	1	0	no
3	1	low	suburban	hedge hogs	hedgehog	hedgehog	small mammal	mammal	1	0	girl	sixth	0	0	0	0	1	1	no
3	1	low	suburban	baby monkeys	baby monkey	monkey	primate	mammal	1	0	girl	sixth	0	0	0	0	1	1	no
3	1	low	suburban	baby bunnies	baby rabbit	rabbit	rabbit	mammal	3	0	girl	sixth	0	0	0	0	1	1	no
3	1	low	suburban	sloths	sloth	sloth	anteater, sloth, armadillo	mammal	1	0	girl	sixth	0	0	0	0	1	1	no
3	2	high	suburban	lion	lion	lion	big cat	mammal	1	0	boy	fourth	0	0	0	0	1	0	no
3	2	high	suburban	lizzard	lizard	lizard	lizard	reptile	3	0	boy	fourth	0	0	0	0	1	0	no
3	2	high	suburban	panda	panda	panda	bear	mammal	1	0	boy	fourth	0	0	0	0	1	0	no
3	2	high	suburban	rabbit	rabbit	rabbit	rabbit	mammal	3	0	boy	fourth	0	0	0	0	1	0	no
3	2	high	suburban	cat	cat	cat	cat	mammal	3	0	girl	fourth	0	1	0	0	0	0	no
3	2	high	suburban	kitty	baby cat	cat	cat	mammal	3	0	girl	fourth	0	1	0	0	0	0	no
3	2	high	suburban	dogs	dog	dog	dog	mammal	3	0	girl	fourth	0	1	0	0	0	0	no
3	2	high	suburban	zebra	zebra	zebra	ungulate	mammal	1	0	girl	fourth	0	1	0	0	0	0	no
3	2	high	suburban	cat!	cat	cat	cat	mammal	3	0	boy	fourth	0	0	1	0	0	0	no
3	2	high	suburban	dog!	dog	dog	dog	mammal	3	0	boy	fourth	0	0	1	0	0	0	no
3	2	high	suburban	guiny pig!	guinea pig	guinea pig	small mammal	mammal	3	0	boy	fourth	0	0	1	0	0	0	no
3	2	high	suburban	lizard!	lizard	lizard	lizard	reptile	3	0	boy	fourth	0	0	1	0	0	0	no
3	2	high	suburban	dog!	dog	dog	dog	mammal	3	0	boy	fourth	0	1	0	0	0	0	no
3	2	high	suburban	horse!	horse	horse	domestic ungulate	mammal	3	0	boy	fourth	0	1	0	0	0	0	no
3	2	high	suburban	pandas!	panda	panda	bear	mammal	1	0	boy	fourth	0	1	0	0	0	0	no
3	2	high	suburban	rabbit!	rabbit	rabbit	rabbit	mammal	3	0	boy	fourth	0	1	0	0	0	0	no
3	2	high	suburban	cats	cat	cat	cat	mammal	3	0	boy	fourth	0	1	1	1	0	0	no
3	2	high	suburban	dogs	dog	dog	dog	mammal	3	0	boy	fourth	0	1	1	1	0	0	no
3	2	high	suburban	lion	lion	lion	big cat	mammal	1	0	boy	fourth	0	1	1	1	0	0	no
3	2	high	suburban	panda	panda	panda	bear	mammal	1	0	boy	fourth	0	1	1	1	0	0	no
3	2	high	suburban	chicken	chicken	chicken	ground bird	bird	3	0	boy	fourth	0	0	1	0	0	0	no
3	2	high	suburban	dog	dog	dog	dog	mammal	3	0	boy	fourth	0	0	1	0	0	0	no
3	2	high	suburban	money	monkey	monkey	primate	mammal	1	0	boy	fourth	0	0	1	0	0	0	no
3	2	high	suburban	pana	panda	panda	bear	mammal	1	0	boy	fourth	0	0	1	0	0	0	no
3	2	high	suburban	blue whales	blue whale	blue whale	marine mammal	mammal	1	0	girl	fourth	0	0	1	0	0	0	no
3	2	high	suburban	cats	cat	cat	cat	mammal	3	0	girl	fourth	0	0	1	0	0	0	no
3	2	high	suburban	dogs	dog	dog	dog	mammal	3	0	girl	fourth	0	0	1	0	0	0	no
3	2	high	suburban	bunnys	rabbit	rabbit	rabbit	mammal	3	0	girl	fourth	0	0	1	0	0	0	no
3	2	high	suburban	cats	cat	cat	cat	mammal	3	0	girl	fourth	0	1	0	0	0	0	no
3	2	high	suburban	puppys	baby dog	dog	dog	mammal	3	0	girl	fourth	0	1	0	0	0	0	no
3	2	high	suburban	hamster	hamster	hamster	small mammal	mammal	3	0	girl	fourth	0	1	0	0	0	0	no
3	2	high	suburban	bunnys	rabbit	rabbit	rabbit	mammal	3	0	girl	fourth	0	1	0	0	0	0	no
3	2	high	suburban	wild cat	cat	cat	cat	mammal	3	0	girl	fourth	0	1	0	1	0	0	no
3	2	high	suburban	dolphins	dolphin	dolphin	marine mammal	mammal	1	0	girl	fourth	0	1	0	1	0	0	no
3	2	high	suburban	lions	lion	lion	big cat	mammal	1	0	girl	fourth	0	1	0	1	0	0	no
3	2	high	suburban	orangatangs	orangutan	orangutan	primate	mammal	1	0	girl	fourth	0	1	0	1	0	0	no
3	2	high	suburban	cats	cat	cat	cat	mammal	3	0	girl	fourth	0	0	1	0	0	0	no
3	2	high	suburban	dog	dog	dog	dog	mammal	3	0	girl	fourth	0	0	1	0	0	0	no
3	2	high	suburban	dolphin	dolphin	dolphin	marine mammal	mammal	1	0	girl	fourth	0	0	1	0	0	0	no
3	2	high	suburban	puppy wolf	baby wolf	wolf	canid	mammal	1	0	girl	fourth	0	0	1	0	0	0	no
3	2	high	suburban	dog	dog	dog	dog	mammal	3	0	boy	fourth	0	1	0	0	0	0	no
3	2	high	suburban	puppy	baby dog	dog	dog	mammal	3	0	boy	fourth	0	1	0	0	0	0	no
3	2	high	suburban	kolwala	koala	koala	marsupial	mammal	1	0	boy	fourth	0	1	0	0	0	0	no
3	2	high	suburban	panda	panda	panda	bear	mammal	1	0	boy	fourth	0	1	0	0	0	0	no
3	2	high	suburban	cat	cat	cat	cat	mammal	3	0	girl	fourth	0	0	0	0	0	1	no
3	2	high	suburban	dog	dog	dog	dog	mammal	3	0	girl	fourth	0	0	0	0	0	1	no
3	2	high	suburban	panda	panda	panda	bear	mammal	1	0	girl	fourth	0	0	0	0	0	1	no
3	2	high	suburban	cats	cat	cat	cat	mammal	3	0	boy	fourth	0	0	1	0	0	0	no
3	2	high	suburban	deer	deer	deer	ungulate	mammal	2	1	boy	fourth	0	0	1	0	0	0	no
3	2	high	suburban	goldenrchrivers	golden retriever	dog	dog	mammal	3	0	boy	fourth	0	0	1	0	0	0	no
3	2	high	suburban	frog	frog	frog	amphibian	amphibian	2	0	boy	fourth	0	0	1	0	0	0	no
3	2	high	suburban	bulls	bull	cow	domestic ungulate	mammal	3	0	boy	fourth	0	0	1	0	0	0	no
3	2	high	suburban	bulldogs	bulldog	dog	dog	mammal	3	0	boy	fourth	0	0	1	0	0	0	no
3	2	high	suburban	dog	dog	dog	dog	mammal	3	0	boy	fourth	0	0	1	0	0	0	no
3	2	high	suburban	tiger	tiger	tiger	big cat	mammal	1	0	boy	fourth	0	0	1	0	0	0	no
3	2	high	suburban	pitbulls	pitbull	dog	dog	mammal	3	0	boy	fourth	0	1	0	0	0	0	no
3	2	high	suburban	fish	fish	fish	fish	fish	3	0	boy	fourth	0	1	0	0	0	0	no
3	2	high	suburban	ginea pig	guinea pig	guinea pig	small mammal	mammal	3	0	boy	fourth	0	1	0	0	0	0	no
3	2	high	suburban	rabbit	rabbit	rabbit	rabbit	mammal	3	0	boy	fourth	0	1	0	0	0	0	no
3	2	high	suburban	BRID	bird	bird	bird	bird	3	0	girl	fourth	1	0	0	0	0	0	no response
3	2	high	suburban	DOLFENS	dolphin	dolphin	marine mammal	mammal	1	0	girl	fourth	1	0	0	0	0	0	no response
3	2	high	suburban	RABITS	rabbit	rabbit	rabbit	mammal	3	0	girl	fourth	1	0	0	0	0	0	no response
3	2	high	suburban	beby bears	baby bear	bear	bear	mammal	2	1	girl	fourth	0	0	1	0	0	0	no
3	2	high	suburban	beby cat	baby cat	cat	cat	mammal	3	0	girl	fourth	0	0	1	0	0	0	no
3	2	high	suburban	beby dog	baby dog	dog	dog	mammal	3	0	girl	fourth	0	0	1	0	0	0	no
3	2	high	suburban	beby lion	beby lion	lion	big cat	mammal	1	0	girl	fourth	0	0	1	0	0	0	no
3	2	high	suburban	dog	dog	dog	dog	mammal	3	0	boy	fourth	0	0	0	0	0	1	no
3	2	high	suburban	lion	lion	lion	big cat	mammal	1	0	boy	fourth	0	0	0	0	0	1	no
3	2	high	suburban	nahrwahel	narwhal	narwhal	marine mammal	mammal	1	0	boy	fourth	0	0	0	0	0	1	no
3	2	high	suburban	wolf	wolf	wolf	canid	mammal	1	0	boy	fourth	0	0	0	0	0	1	no
3	2	high	suburban	coyote	coyote	coyote	canid	mammal	0	1	girl	fourth	0	1	0	0	0	0	no
3	2	high	suburban	dog	dog	dog	dog	mammal	3	0	girl	fourth	0	1	0	0	0	0	no
3	2	high	suburban	whale	whale	whale	marine mammal	mammal	1	0	girl	fourth	0	1	0	0	0	0	no
3	2	high	suburban	zebra	zebra	zebra	ungulate	mammal	1	0	girl	fourth	0	1	0	0	0	0	no
3	2	high	suburban	cats	cat	cat	cat	mammal	3	0	girl	fourth	0	0	1	0	0	0	no
3	2	high	suburban	dogs	dog	dog	dog	mammal	3	0	girl	fourth	0	0	1	0	0	0	no
3	2	high	suburban	ginypig	guinea pig	guinea pig	small mammal	mammal	3	0	girl	fourth	0	0	1	0	0	0	no
3	2	high	suburban	horses	horse	horse	domestic ungulate	mammal	3	0	girl	fourth	0	0	1	0	0	0	no
2	3	high	suburban	dogs	dog	dog	dog	mammal	3	0	girl	eigth	0	1	0	0	0	0	no
2	3	high	suburban	dolphins	dolphin	dolphin	marine mammal	mammal	1	0	girl	eigth	0	1	0	0	0	0	no
2	3	high	suburban	koala	koala	koala	marsupial	mammal	1	0	girl	eigth	0	1	0	0	0	0	no
2	3	high	suburban	hedgehog	hedgehog	hedgehog	small mammal	mammal	1	0	no response	eigth	0	0	0	0	0	0	no
2	3	high	suburban	monkeys	monkey	monkey	primate	mammal	1	0	no response	eigth	0	0	0	0	0	0	no
2	3	high	suburban	scorpion	scorpion	scorpion	arachnid	terrestrial invertebrate	2	1	no response	eigth	0	0	0	0	0	0	no
2	3	high	suburban	taranchalas	tarantula	tarantula	arachnid	terrestrial invertebrate	1	0	no response	eigth	0	0	0	0	0	0	no
2	3	high	suburban	Dog	dog	dog	dog	mammal	3	0	boy	eigth	0	0	1	0	0	0	no
2	3	high	suburban	Lions	lion	lion	big cat	mammal	1	0	boy	eigth	0	0	1	0	0	0	no
2	3	high	suburban	Tigers	tiger	tiger	big cat	mammal	1	0	boy	eigth	0	0	1	0	0	0	no
2	3	high	suburban	Wolf	wolf	wolf	canid	mammal	1	0	boy	eigth	0	0	1	0	0	0	no
2	3	high	suburban	Cats	cat	cat	cat	mammal	3	0	boy	eigth	0	0	1	0	0	0	no
2	3	high	suburban	Puppies	baby dog	dog	dog	mammal	3	0	boy	eigth	0	0	1	0	0	0	no
2	3	high	suburban	Bunnies	rabbit	rabbit	rabbit	mammal	3	0	boy	eigth	0	0	1	0	0	0	no
2	3	high	suburban	wolves	wolf	wolf	canid	mammal	1	0	boy	eigth	0	0	1	0	0	0	no
2	3	high	suburban	Cat	cat	cat	cat	mammal	3	0	boy	eigth	0	1	0	0	0	0	no
2	3	high	suburban	Dog	dog	dog	dog	mammal	3	0	boy	eigth	0	1	0	0	0	0	no
2	3	high	suburban	Lion	lion	lion	big cat	mammal	1	0	boy	eigth	0	1	0	0	0	0	no
2	3	high	suburban	Zebra	zebra	zebra	ungulate	mammal	1	0	boy	eigth	0	1	0	0	0	0	no
2	3	high	suburban	Cat	cat	cat	cat	mammal	3	0	boy	eigth	0	0	1	0	0	0	no
2	3	high	suburban	Dog	dog	dog	dog	mammal	3	0	boy	eigth	0	0	1	0	0	0	no
2	3	high	suburban	Panda	panda	panda	bear	mammal	1	0	boy	eigth	0	0	1	0	0	0	no
2	3	high	suburban	Rabbit	rabbit	rabbit	rabbit	mammal	3	0	boy	eigth	0	0	1	0	0	0	no
2	3	high	suburban	dogs	dog	dog	dog	mammal	3	0	no response	eigth	0	0	1	0	0	0	no
2	3	high	suburban	horses	horse	horse	domestic ungulate	mammal	3	0	no response	eigth	0	0	1	0	0	0	no
2	3	high	suburban	pengiuns	penguin	penguin	aquatic bird	bird	1	0	no response	eigth	0	0	1	0	0	0	no
2	3	high	suburban	turtles	turtle	turtle	turtle	reptile	3	0	no response	eigth	0	0	1	0	0	0	no
2	3	high	suburban	cats	cat	cat	cat	mammal	3	0	girl	eigth	0	1	1	1	1	1	no
2	3	high	suburban	dogs	dog	dog	dog	mammal	3	0	girl	eigth	0	1	1	1	1	1	no
2	3	high	suburban	pandas	panda	panda	bear	mammal	1	0	girl	eigth	0	1	1	1	1	1	no
2	3	high	suburban	wolves	wolf	wolf	canid	mammal	1	0	girl	eigth	0	1	1	1	1	1	no
2	3	high	suburban	birds	bird	bird	bird	bird	3	0	girl	eigth	0	0	1	0	0	0	no
2	3	high	suburban	dogs	dog	dog	dog	mammal	3	0	girl	eigth	0	0	1	0	0	0	no
2	3	high	suburban	fish	fish	fish	fish	fish	3	0	girl	eigth	0	0	1	0	0	0	no
2	3	high	suburban	monkeys	monkey	monkey	primate	mammal	1	0	girl	eigth	0	0	1	0	0	0	no
2	3	high	suburban	Hamsters	hamster	hamster	small mammal	mammal	3	0	girl	eigth	0	0	1	0	0	0	no
2	3	high	suburban	Bunny	rabbit	rabbit	rabbit	mammal	3	0	girl	eigth	0	0	1	0	0	0	no
2	3	high	suburban	shark	shark	shark	shark	fish	1	0	boy	eigth	0	1	0	0	1	0	no
2	3	high	suburban	sheep	sheep	sheep	domestic ungulate	mammal	3	0	boy	eigth	0	1	0	0	1	0	no
2	3	high	suburban	whale	whale	whale	marine mammal	mammal	1	0	boy	eigth	0	1	0	0	1	0	no
2	3	high	suburban	wolfs	wolf	wolf	canid	mammal	1	0	boy	eigth	0	1	0	0	1	0	no
2	3	high	suburban	dogs	dog	dog	dog	mammal	3	0	girl	eigth	0	0	0	0	0	1	no
2	3	high	suburban	griffas	giraffe	giraffe	African megafauna	mammal	1	0	girl	eigth	0	0	0	0	0	1	no
2	3	high	suburban	moneys	monkey	monkey	primate	mammal	1	0	girl	eigth	0	0	0	0	0	1	no
2	3	high	suburban	pigs	pig	pig	domestic ungulate	mammal	3	0	girl	eigth	0	0	0	0	0	1	no
2	3	high	suburban	dogs	dog	dog	dog	mammal	3	0	girl	eigth	0	1	0	0	1	0	no
2	3	high	suburban	frogs	frog	frog	amphibian	amphibian	2	0	girl	eigth	0	1	0	0	1	0	no
2	3	high	suburban	rabbits	rabbit	rabbit	rabbit	mammal	3	0	girl	eigth	0	1	0	0	1	0	no
2	3	high	suburban	worms	worm	worm	terrestrial mollusk or worm	terrestrial invertebrate	2	1	girl	eigth	0	1	0	0	1	0	no
2	3	high	suburban	dogs	dog	dog	dog	mammal	3	0	boy	eigth	0	0	1	0	0	0	yes
2	3	high	suburban	panda	panda	panda	bear	mammal	1	0	boy	eigth	0	0	1	0	0	0	yes
2	3	high	suburban	penguins	penguin	penguin	aquatic bird	bird	1	0	boy	eigth	0	0	1	0	0	0	yes
2	3	high	suburban	pigs	pig	pig	domestic ungulate	mammal	3	0	boy	eigth	0	0	1	0	0	0	yes
2	3	high	suburban	puppies/ dogs	baby dog	dog	dog	mammal	3	0	girl	eigth	0	0	1	0	0	0	no
2	3	high	suburban	monkey	monkey	monkey	primate	mammal	1	0	girl	eigth	0	0	1	0	0	0	no
2	3	high	suburban	panda bears	panda	panda	bear	mammal	1	0	girl	eigth	0	0	1	0	0	0	no
2	3	high	suburban	bunny	rabbit	rabbit	rabbit	mammal	3	0	girl	eigth	0	0	1	0	0	0	no
2	3	high	suburban	birds	bird	bird	bird	bird	3	0	girl	eigth	0	1	0	0	0	0	no
2	3	high	suburban	dogs	dog	dog	dog	mammal	3	0	girl	eigth	0	1	0	0	0	0	no
2	3	high	suburban	foxs	fox	fox	canid	mammal	2	1	girl	eigth	0	1	0	0	0	0	no
2	3	high	suburban	squirrels	squirrel	squirrel	small mammal	mammal	2	1	girl	eigth	0	1	0	0	0	0	no
2	3	high	suburban	Deer	deer	deer	ungulate	mammal	2	1	girl	eigth	0	0	1	0	0	0	no
2	3	high	suburban	Elephants	elephant	elephant	African megafauna	mammal	1	0	girl	eigth	0	0	1	0	0	0	no
2	3	high	suburban	Koalas	koala	koala	marsupial	mammal	1	0	girl	eigth	0	0	1	0	0	0	no
2	3	high	suburban	Pandas	panda	panda	bear	mammal	1	0	girl	eigth	0	0	1	0	0	0	no
2	3	high	suburban	horses	horse	horse	domestic ungulate	mammal	3	0	girl	eigth	0	1	0	0	0	0	no
2	3	high	suburban	panda	panda	panda	bear	mammal	1	0	girl	eigth	0	1	0	0	0	0	no
2	3	high	suburban	rabbit	rabbit	rabbit	rabbit	mammal	3	0	girl	eigth	0	1	0	0	0	0	no
2	3	high	suburban	wolf	wolf	wolf	canid	mammal	1	0	girl	eigth	0	1	0	0	0	0	no
2	3	high	suburban	owls	owl	owl	raptor or owl	bird	2	1	girl	eigth	0	0	1	0	0	1	no
2	3	high	suburban	pandas	panda	panda	bear	mammal	1	0	girl	eigth	0	0	1	0	0	1	no
2	3	high	suburban	tigers	tiger	tiger	big cat	mammal	1	0	girl	eigth	0	0	1	0	0	1	no
2	3	high	suburban	wolves	wolf	wolf	canid	mammal	1	0	girl	eigth	0	0	1	0	0	1	no
2	3	high	suburban	Dogs	dog	dog	dog	mammal	3	0	boy	eigth	0	1	0	0	1	1	no
2	3	high	suburban	Lions	lion	lion	big cat	mammal	1	0	boy	eigth	0	1	0	0	1	1	no
2	3	high	suburban	Tigers	tiger	tiger	big cat	mammal	1	0	boy	eigth	0	1	0	0	1	1	no
2	3	high	suburban	Wolves	wolf	wolf	canid	mammal	1	0	boy	eigth	0	1	0	0	1	1	no
2	3	high	suburban	grey wolf	grey wolf	grey wolf	canid	mammal	1	0	boy	eigth	0	1	0	0	0	0	no
2	3	high	suburban	horses	horse	horse	domestic ungulate	mammal	3	0	boy	eigth	0	1	0	0	0	0	no
2	3	high	suburban	raven	raven	raven	songbird or parrot	bird	2	1	boy	eigth	0	1	0	0	0	0	no
2	3	high	suburban	skunk	skunk	skunk	other carnivore	mammal	2	1	boy	eigth	0	1	0	0	0	0	no
2	3	high	suburban	kangaroo	kangaroo	kangaroo	marsupial	mammal	1	0	boy	eigth	0	0	1	0	0	0	no
2	3	high	suburban	monkey	monkey	monkey	primate	mammal	1	0	boy	eigth	0	0	1	0	0	0	no
2	3	high	suburban	panda	panda	panda	bear	mammal	1	0	boy	eigth	0	0	1	0	0	0	no
2	3	high	suburban	wolf	wolf	wolf	canid	mammal	1	0	boy	eigth	0	0	1	0	0	0	no
2	3	high	suburban	Puppies	baby dog	dog	dog	mammal	3	0	girl	eigth	0	0	1	0	0	1	no
2	3	high	suburban	Hamsters	hamster	hamster	small mammal	mammal	3	0	girl	eigth	0	0	1	0	0	1	no
2	3	high	suburban	Jellyfish	jellyfish	jellyfish	marine invertebrate	marine invertebrate	1	0	girl	eigth	0	0	1	0	0	1	no
2	3	high	suburban	Pandas	panda	panda	bear	mammal	1	0	girl	eigth	0	0	1	0	0	1	no
2	3	high	suburban	Elephants	elephant	elephant	African megafauna	mammal	1	0	girl	eigth	0	1	1	0	0	0	no
2	3	high	suburban	Fish	fish	fish	fish	fish	3	0	girl	eigth	0	1	1	0	0	0	no
2	3	high	suburban	Giraffes	giraffe	giraffe	African megafauna	mammal	1	0	girl	eigth	0	1	1	0	0	0	no
2	3	high	suburban	Horses	horse	horse	domestic ungulate	mammal	3	0	girl	eigth	0	1	1	0	0	0	no
2	3	high	suburban	Octopus	octopus	octopus	marine invertebrate	marine invertebrate	1	0	girl	eigth	0	0	1	0	0	0	no
2	3	high	suburban	Sharks	shark	shark	shark	fish	1	0	girl	eigth	0	0	1	0	0	0	no
2	3	high	suburban	Vultures	vulture	vulture	raptor or owl	bird	1	0	girl	eigth	0	0	1	0	0	0	no
2	3	high	suburban	birds	bird	bird	bird	bird	3	0	girl	eigth	0	1	0	0	0	1	no
2	3	high	suburban	cats/kittens	cat	cat	cat	mammal	3	0	girl	eigth	0	1	0	0	0	1	no
2	3	high	suburban	dogs/puppies	dog	dog	dog	mammal	3	0	girl	eigth	0	1	0	0	0	1	no
2	3	high	suburban	monkeys/chimpanzees	monkey	monkey	primate	mammal	1	0	girl	eigth	0	1	0	0	0	1	no
2	3	high	suburban	Lions	lion	lion	big cat	mammal	1	0	boy	eigth	0	0	1	0	0	0	yes
2	3	high	suburban	Piranhas	piranha	piranha	fish	fish	1	0	boy	eigth	0	0	1	0	0	0	yes
2	3	high	suburban	Sharks	shark	shark	shark	fish	1	0	boy	eigth	0	0	1	0	0	0	yes
2	3	high	suburban	Snakes	snake	snake	snake	reptile	3	0	boy	eigth	0	0	1	0	0	0	yes
2	3	high	suburban	Crabs	crab	crab	marine invertebrate	marine invertebrate	2	1	boy	eigth	0	1	0	0	0	0	no
2	3	high	suburban	Jaguars	jaguar	jaguar	big cat	mammal	1	0	boy	eigth	0	1	0	0	0	0	no
2	3	high	suburban	Polar bears	polar bear	polar bear	bear	mammal	1	0	boy	eigth	0	1	0	0	0	0	no
2	3	high	suburban	Sharks	shark	shark	shark	fish	1	0	boy	eigth	0	1	0	0	0	0	no
2	3	high	suburban	dog	dog	dog	dog	mammal	3	0	boy	eigth	0	1	0	1	0	0	no
2	3	high	suburban	dog	dog	dog	dog	mammal	3	0	boy	eigth	0	1	0	1	0	0	no
2	3	high	suburban	dog	dog	dog	dog	mammal	3	0	boy	eigth	0	1	0	1	0	0	no
2	3	high	suburban	dog	dog	dog	dog	mammal	3	0	boy	eigth	0	1	0	1	0	0	no
2	3	high	suburban	Dolphines	dolphin	dolphin	marine mammal	mammal	1	0	girl	eigth	0	1	1	0	0	0	no
2	3	high	suburban	Giaraffes	giraffe	giraffe	African megafauna	mammal	1	0	girl	eigth	0	1	1	0	0	0	no
2	3	high	suburban	Horses	horse	horse	domestic ungulate	mammal	3	0	girl	eigth	0	1	1	0	0	0	no
2	3	high	suburban	Pandas	panda	panda	bear	mammal	1	0	girl	eigth	0	1	1	0	0	0	no
2	3	high	suburban	fish	fish	fish	fish	fish	3	0	girl	eigth	0	1	0	0	0	0	no
2	3	high	suburban	tigers	tiger	tiger	big cat	mammal	1	0	girl	eigth	0	1	0	0	0	0	no
2	3	high	suburban	turtles	turtle	turtle	turtle	reptile	3	0	girl	eigth	0	1	0	0	0	0	no
2	3	high	suburban	wolves	wolf	wolf	canid	mammal	1	0	girl	eigth	0	1	0	0	0	0	no
2	3	high	suburban	Cats	cat	cat	cat	mammal	3	0	girl	eigth	0	0	0	0	1	0	no
2	3	high	suburban	Deer	deer	deer	ungulate	mammal	2	1	girl	eigth	0	0	0	0	1	0	no
2	3	high	suburban	Dogs	dog	dog	dog	mammal	3	0	girl	eigth	0	0	0	0	1	0	no
2	3	high	suburban	Rabbit	rabbit	rabbit	rabbit	mammal	3	0	girl	eigth	0	0	0	0	1	0	no
2	3	high	suburban	cats	cat	cat	cat	mammal	3	0	girl	eigth	0	0	1	0	0	0	no
2	3	high	suburban	deer	deer	deer	ungulate	mammal	2	1	girl	eigth	0	0	1	0	0	0	no
2	3	high	suburban	fennec fox	fennec fox	fennec fox	canid	mammal	1	0	girl	eigth	0	0	1	0	0	0	no
2	3	high	suburban	owls	owl	owl	raptor or owl	bird	2	1	girl	eigth	0	0	1	0	0	0	no
2	3	high	suburban	Bears	bear	bear	bear	mammal	2	1	boy	eigth	0	0	1	0	0	0	no
2	3	high	suburban	Elephants	elephant	elephant	African megafauna	mammal	1	0	boy	eigth	0	0	1	0	0	0	no
2	3	high	suburban	Monkey	monkey	monkey	primate	mammal	1	0	boy	eigth	0	0	1	0	0	0	no
2	3	high	suburban	Tigers	tiger	tiger	big cat	mammal	1	0	boy	eigth	0	0	1	0	0	0	no
2	3	high	suburban	cheetah	cheetah	cheetah	felid	mammal	1	0	girl	eigth	0	1	0	1	0	0	no
2	3	high	suburban	dogs	dog	dog	dog	mammal	3	0	girl	eigth	0	1	0	1	0	0	no
2	3	high	suburban	horse	horse	horse	domestic ungulate	mammal	3	0	girl	eigth	0	1	0	1	0	0	no
2	3	high	suburban	parakeet (birds)	parakeet	parakeet	songbird or parrot	bird	1	0	girl	eigth	0	1	0	1	0	0	no
2	3	high	suburban	Cats	cat	cat	cat	mammal	3	0	boy	eigth	0	0	1	0	1	1	no
2	3	high	suburban	Dogs	dog	dog	dog	mammal	3	0	boy	eigth	0	0	1	0	1	1	no
2	3	high	suburban	Pandas	panda	panda	bear	mammal	1	0	boy	eigth	0	0	1	0	1	1	no
2	3	high	suburban	Turtles	turtle	turtle	turtle	reptile	3	0	boy	eigth	0	0	1	0	1	1	no
2	3	high	suburban	foxes	fox	fox	canid	mammal	2	1	boy	eigth	0	0	1	0	0	0	no
2	3	high	suburban	Horses	horse	horse	domestic ungulate	mammal	3	0	boy	eigth	0	0	1	0	0	0	no
2	3	high	suburban	kangaroo	kangaroo	kangaroo	marsupial	mammal	1	0	boy	eigth	0	0	1	0	0	0	no
2	3	high	suburban	turtles	turtle	turtle	turtle	reptile	3	0	boy	eigth	0	0	1	0	0	0	no
2	3	high	suburban	bears	bear	bear	bear	mammal	2	1	boy	eigth	0	0	0	1	1	0	no
2	3	high	suburban	monkeys	monkey	monkey	primate	mammal	1	0	boy	eigth	0	0	0	1	1	0	no
2	3	high	suburban	penguens	penguin	penguin	aquatic bird	bird	1	0	boy	eigth	0	0	0	1	1	0	no
2	3	high	suburban	wolf	wolf	wolf	canid	mammal	1	0	boy	eigth	0	0	0	1	1	0	no
2	3	high	suburban	Cats	cat	cat	cat	mammal	3	0	boy	eigth	0	0	1	0	0	0	no
2	3	high	suburban	Cheetahs	cheetah	cheetah	felid	mammal	1	0	boy	eigth	0	0	1	0	0	0	no
2	3	high	suburban	Dogs	dog	dog	dog	mammal	3	0	boy	eigth	0	0	1	0	0	0	no
2	3	high	suburban	Lions	lion	lion	big cat	mammal	1	0	boy	eigth	0	0	1	0	0	0	no
2	3	high	suburban	Cats	cat	cat	cat	mammal	3	0	girl	eigth	0	0	1	0	0	0	no
2	3	high	suburban	Dogs	dog	dog	dog	mammal	3	0	girl	eigth	0	0	1	0	0	0	no
2	3	high	suburban	Hamsters	hamster	hamster	small mammal	mammal	3	0	girl	eigth	0	0	1	0	0	0	no
2	3	high	suburban	Owls	owl	owl	raptor or owl	bird	2	1	girl	eigth	0	0	1	0	0	0	no
2	3	high	suburban	Dogs	dog	dog	dog	mammal	3	0	girl	eigth	0	1	0	0	0	0	no
2	3	high	suburban	Dolphins	dolphin	dolphin	marine mammal	mammal	1	0	girl	eigth	0	1	0	0	0	0	no
2	3	high	suburban	Koala Bears	koala	koala	marsupial	mammal	1	0	girl	eigth	0	1	0	0	0	0	no
2	3	high	suburban	Panda Bears	panda	panda	bear	mammal	1	0	girl	eigth	0	1	0	0	0	0	no
2	3	high	suburban	bear	bear	bear	bear	mammal	2	1	boy	eigth	0	0	1	0	0	0	no
2	3	high	suburban	pollo	chicken	chicken	ground bird	bird	3	0	boy	eigth	0	0	1	0	0	0	no
2	3	high	suburban	lions	lion	lion	big cat	mammal	1	0	boy	eigth	0	0	1	0	0	0	no
2	3	high	suburban	tiger	tiger	tiger	big cat	mammal	1	0	boy	eigth	0	0	1	0	0	0	no
2	3	high	suburban	Bats	bat	bat	bat	mammal	2	1	boy	eigth	0	0	1	0	0	0	no
2	3	high	suburban	Scorpian	scorpion	scorpion	arachnid	terrestrial invertebrate	2	1	boy	eigth	0	0	1	0	0	0	no
2	3	high	suburban	Snakes	snake	snake	snake	reptile	3	0	boy	eigth	0	0	1	0	0	0	no
2	3	high	suburban	dogs	dog	dog	dog	mammal	3	0	girl	eigth	0	0	1	0	0	0	no
2	3	high	suburban	elephants	elephant	elephant	African megafauna	mammal	1	0	girl	eigth	0	0	1	0	0	0	no
2	3	high	suburban	harp seals	harp seal	harp seal	marine mammal	mammal	1	0	girl	eigth	0	0	1	0	0	0	no
2	3	high	suburban	polar bears	polar bear	polar bear	bear	mammal	1	0	girl	eigth	0	0	1	0	0	0	no
2	3	high	suburban	cats	cat	cat	cat	mammal	3	0	girl	eigth	0	0	1	0	0	0	no
2	3	high	suburban	bulldogs	bulldog	dog	dog	mammal	3	0	girl	eigth	0	0	1	0	0	0	no
2	3	high	suburban	pugs	pug	dog	dog	mammal	3	0	girl	eigth	0	0	1	0	0	0	no
2	3	high	suburban	wombats	wombat	wombat	marsupial	mammal	1	0	girl	eigth	0	0	1	0	0	0	no
2	3	high	suburban	cats	cat	cat	cat	mammal	3	0	boy	eigth	0	1	0	0	0	0	no
2	3	high	suburban	elephants	elephant	elephant	African megafauna	mammal	1	0	boy	eigth	0	1	0	0	0	0	no
2	3	high	suburban	koala	koala	koala	marsupial	mammal	1	0	boy	eigth	0	1	0	0	0	0	no
2	3	high	suburban	pandas	panda	panda	bear	mammal	1	0	boy	eigth	0	1	0	0	0	0	no
3	3	high	suburban	Cats	cat	cat	cat	mammal	3	0	boy	eigth	0	0	1	0	0	0	yes
3	3	high	suburban	Dogs	dog	dog	dog	mammal	3	0	boy	eigth	0	0	1	0	0	0	yes
3	3	high	suburban	Lions	lion	lion	big cat	mammal	1	0	boy	eigth	0	0	1	0	0	0	yes
3	3	high	suburban	Wolfs	wolf	wolf	canid	mammal	1	0	boy	eigth	0	0	1	0	0	0	yes
3	3	high	suburban	cats	cat	cat	cat	mammal	3	0	boy	eigth	0	1	0	0	0	0	yes
3	3	high	suburban	cats,dogs,deer,jagwire	cat	cat	cat	mammal	3	0	boy	eigth	0	1	0	0	0	0	yes
3	3	high	suburban	deer	deer	deer	ungulate	mammal	2	1	boy	eigth	0	1	0	0	0	0	yes
3	3	high	suburban	dogs	dog	dog	dog	mammal	3	0	boy	eigth	0	1	0	0	0	0	yes
3	3	high	suburban	Cheetah	cheetah	cheetah	felid	mammal	1	0	boy	eigth	0	1	0	0	1	0	no
3	3	high	suburban	Lions	lion	lion	big cat	mammal	1	0	boy	eigth	0	1	0	0	1	0	no
3	3	high	suburban	tigers	tiger	tiger	big cat	mammal	1	0	boy	eigth	0	1	0	0	1	0	no
3	3	high	suburban	wolves	wolf	wolf	canid	mammal	1	0	boy	eigth	0	1	0	0	1	0	no
3	3	high	suburban	puppies	baby dog	dog	dog	mammal	3	0	girl	eigth	0	0	1	0	0	0	no
3	3	high	suburban	koalas	koala	koala	marsupial	mammal	1	0	girl	eigth	0	0	1	0	0	0	no
3	3	high	suburban	baby pigs	baby pig	pig	domestic ungulate	mammal	3	0	girl	eigth	0	0	1	0	0	0	no
3	3	high	suburban	red pandas	red panda	red panda	other carnivore	mammal	1	0	girl	eigth	0	0	1	0	0	0	no
3	3	high	suburban	birds	bird	bird	bird	bird	3	0	boy	eigth	0	0	1	0	0	0	no
3	3	high	suburban	fish	fish	fish	fish	fish	3	0	boy	eigth	0	0	1	0	0	0	no
3	3	high	suburban	foxes	fox	fox	canid	mammal	2	1	boy	eigth	0	0	1	0	0	0	no
3	3	high	suburban	bunny	rabbit	rabbit	rabbit	mammal	3	0	boy	eigth	0	0	1	0	0	0	no
3	3	high	suburban	dogs	dog	dog	dog	mammal	3	0	girl	eigth	0	1	0	0	0	0	no
3	3	high	suburban	fish	fish	fish	fish	fish	3	0	girl	eigth	0	1	0	0	0	0	no
3	3	high	suburban	horses	horse	horse	domestic ungulate	mammal	3	0	girl	eigth	0	1	0	0	0	0	no
3	3	high	suburban	pigs	pig	pig	domestic ungulate	mammal	3	0	girl	eigth	0	1	0	0	0	0	no
3	3	high	suburban	bears	bear	bear	bear	mammal	2	1	boy	eigth	0	1	0	0	0	0	yes
3	3	high	suburban	lions	lion	lion	big cat	mammal	1	0	boy	eigth	0	1	0	0	0	0	yes
3	3	high	suburban	panda	panda	panda	bear	mammal	1	0	boy	eigth	0	1	0	0	0	0	yes
3	3	high	suburban	tigers	tiger	tiger	big cat	mammal	1	0	boy	eigth	0	1	0	0	0	0	yes
3	3	high	suburban	deer	deer	deer	ungulate	mammal	2	1	girl	eigth	1	0	0	0	0	0	no
3	3	high	suburban	kangaroo	kangaroo	kangaroo	marsupial	mammal	1	0	girl	eigth	1	0	0	0	0	0	no
3	3	high	suburban	panda	panda	panda	bear	mammal	1	0	girl	eigth	1	0	0	0	0	0	no
3	3	high	suburban	rabbit	rabbit	rabbit	rabbit	mammal	3	0	girl	eigth	1	0	0	0	0	0	no
3	3	high	suburban	Dogs	dog	dog	dog	mammal	3	0	boy	eigth	0	0	1	0	0	0	no
3	3	high	suburban	Monkeys	monkey	monkey	primate	mammal	1	0	boy	eigth	0	0	1	0	0	0	no
3	3	high	suburban	Bunny	rabbit	rabbit	rabbit	mammal	3	0	boy	eigth	0	0	1	0	0	0	no
3	3	high	suburban	horse	horse	horse	domestic ungulate	mammal	3	0	boy	eigth	0	1	0	0	0	0	no
3	3	high	suburban	monkey	monkey	monkey	primate	mammal	1	0	boy	eigth	0	1	0	0	0	0	no
3	3	high	suburban	panda	panda	panda	bear	mammal	1	0	boy	eigth	0	1	0	0	0	0	no
3	3	high	suburban	bunny	rabbit	rabbit	rabbit	mammal	3	0	boy	eigth	0	1	0	0	0	0	no
3	3	high	suburban	birds	bird	bird	bird	bird	3	0	girl	eigth	0	1	0	0	0	0	no
3	3	high	suburban	dogs	dog	dog	dog	mammal	3	0	girl	eigth	0	1	0	0	0	0	no
3	3	high	suburban	horses	horse	horse	domestic ungulate	mammal	3	0	girl	eigth	0	1	0	0	0	0	no
3	3	high	suburban	rabbit	rabbit	rabbit	rabbit	mammal	3	0	girl	eigth	0	1	0	0	0	0	no
3	3	high	suburban	Cat	cat	cat	cat	mammal	3	0	girl	eigth	0	1	0	0	0	0	no
3	3	high	suburban	Dog	dog	dog	dog	mammal	3	0	girl	eigth	0	1	0	0	0	0	no
3	3	high	suburban	Hamsters	hamster	hamster	small mammal	mammal	3	0	girl	eigth	0	1	0	0	0	0	no
3	3	high	suburban	Bunnies	rabbit	rabbit	rabbit	mammal	3	0	girl	eigth	0	1	0	0	0	0	no
3	3	high	suburban	Black bear	black bear	black bear	bear	mammal	0	1	boy	eigth	0	0	1	0	0	0	no
3	3	high	suburban	Fox	fox	fox	canid	mammal	2	1	boy	eigth	0	0	1	0	0	0	no
3	3	high	suburban	Toad	toad	toad	amphibian	amphibian	2	0	boy	eigth	0	0	1	0	0	0	no
3	3	high	suburban	Wolfs	wolf	wolf	canid	mammal	1	0	boy	eigth	0	0	1	0	0	0	no
3	3	high	suburban	Bears	bear	bear	bear	mammal	2	1	girl	eigth	0	0	1	0	0	0	no
3	3	high	suburban	Dogs	dog	dog	dog	mammal	3	0	girl	eigth	0	0	1	0	0	0	no
3	3	high	suburban	Huskies	Siberian husky	dog	dog	mammal	3	0	girl	eigth	0	0	1	0	0	0	no
3	3	high	suburban	Tigers	tiger	tiger	big cat	mammal	1	0	girl	eigth	0	0	1	0	0	0	no
3	3	high	suburban	birds	bird	bird	bird	bird	3	0	boy	eigth	0	1	0	0	0	0	yes
3	3	high	suburban	cats	cat	cat	cat	mammal	3	0	boy	eigth	0	1	0	0	0	0	yes
3	3	high	suburban	dogs	dog	dog	dog	mammal	3	0	boy	eigth	0	1	0	0	0	0	yes
3	3	high	suburban	mice	mouse	mouse	small mammal	mammal	1	0	boy	eigth	0	1	0	0	0	0	yes
3	3	high	suburban	Dogs	dog	dog	dog	mammal	3	0	girl	eigth	0	0	1	0	0	0	no
3	3	high	suburban	Koala	koala	koala	marsupial	mammal	1	0	girl	eigth	0	0	1	0	0	0	no
3	3	high	suburban	Panda	panda	panda	bear	mammal	1	0	girl	eigth	0	0	1	0	0	0	no
3	3	high	suburban	Tigers	tiger	tiger	big cat	mammal	1	0	girl	eigth	0	0	1	0	0	0	no
3	3	high	suburban	birds	bird	bird	bird	bird	3	0	boy	eigth	0	0	1	0	0	0	no
3	3	high	suburban	cats	cat	cat	cat	mammal	3	0	boy	eigth	0	0	1	0	0	0	no
3	3	high	suburban	husskys	Siberian husky	dog	dog	mammal	3	0	boy	eigth	0	0	1	0	0	0	no
3	3	high	suburban	hamsters	hamster	hamster	small mammal	mammal	3	0	boy	eigth	0	0	1	0	0	0	no
3	3	high	suburban	foxes	fox	fox	canid	mammal	2	1	girl	eigth	0	0	0	0	1	0	no
3	3	high	suburban	hedgehogs	hedgehog	hedgehog	small mammal	mammal	1	0	girl	eigth	0	0	0	0	1	0	no
3	3	high	suburban	squirrels	squirrel	squirrel	small mammal	mammal	2	1	girl	eigth	0	0	0	0	1	0	no
3	3	high	suburban	wolves	wolf	wolf	canid	mammal	1	0	girl	eigth	0	0	0	0	1	0	no
3	3	high	suburban	cats	cat	cat	cat	mammal	3	0	girl	eigth	0	1	0	0	0	0	no
3	3	high	suburban	dogs	dog	dog	dog	mammal	3	0	girl	eigth	0	1	0	0	0	0	no
3	3	high	suburban	koala bears	koala	koala	marsupial	mammal	1	0	girl	eigth	0	1	0	0	0	0	no
3	3	high	suburban	tigers	tiger	tiger	big cat	mammal	1	0	girl	eigth	0	1	0	0	0	0	no
3	3	high	suburban	dogs	dog	dog	dog	mammal	3	0	girl	eigth	0	1	0	1	1	0	no
3	3	high	suburban	monkeys	monkey	monkey	primate	mammal	1	0	girl	eigth	0	1	0	1	1	0	no
3	3	high	suburban	panda	panda	panda	bear	mammal	1	0	girl	eigth	0	1	0	1	1	0	no
3	3	high	suburban	turtles	turtle	turtle	turtle	reptile	3	0	girl	eigth	0	1	0	1	1	0	no
3	3	high	suburban	Elephant	elephant	elephant	African megafauna	mammal	1	0	girl	eigth	0	0	1	0	0	0	no
3	3	high	suburban	Goats	goat	goat	domestic ungulate	mammal	3	0	girl	eigth	0	0	1	0	0	0	no
3	3	high	suburban	Pandas	panda	panda	bear	mammal	1	0	girl	eigth	0	0	1	0	0	0	no
3	3	high	suburban	hawk	hawk	hawk	raptor or owl	bird	2	1	boy	eigth	0	0	1	0	0	0	no
3	3	high	suburban	panda	panda	panda	bear	mammal	1	0	boy	eigth	0	0	1	0	0	0	no
3	3	high	suburban	rabbit	rabbit	rabbit	rabbit	mammal	3	0	boy	eigth	0	0	1	0	0	0	no
3	3	high	suburban	snake	snake	snake	snake	reptile	3	0	boy	eigth	0	0	1	0	0	0	no
3	3	high	suburban	dogs	dog	dog	dog	mammal	3	0	boy	eigth	0	0	1	0	0	0	no
3	3	high	suburban	farret	ferret	ferret	other carnivore	mammal	3	0	boy	eigth	0	0	1	0	0	0	no
3	3	high	suburban	money	monkey	monkey	primate	mammal	1	0	boy	eigth	0	0	1	0	0	0	no
3	3	high	suburban	wolfs	wolf	wolf	canid	mammal	1	0	boy	eigth	0	0	1	0	0	0	no
3	3	high	suburban	cats	cat	cat	cat	mammal	3	0	girl	eigth	0	0	1	0	0	0	no
3	3	high	suburban	dogs	dog	dog	dog	mammal	3	0	girl	eigth	0	0	1	0	0	0	no
3	3	high	suburban	monkeys	monkey	monkey	primate	mammal	1	0	girl	eigth	0	0	1	0	0	0	no
3	3	high	suburban	panda	panda	panda	bear	mammal	1	0	girl	eigth	0	0	1	0	0	0	no
3	3	high	suburban	dolphins	dolphin	dolphin	marine mammal	mammal	1	0	boy	eigth	0	1	0	1	0	0	no
3	3	high	suburban	lions	lion	lion	big cat	mammal	1	0	boy	eigth	0	1	0	1	0	0	no
3	3	high	suburban	sharks	shark	shark	shark	fish	1	0	boy	eigth	0	1	0	1	0	0	no
3	3	high	suburban	wolfs	wolf	wolf	canid	mammal	1	0	boy	eigth	0	1	0	1	0	0	no
3	3	high	suburban	pugs	pug	dog	dog	mammal	3	0	boy	eigth	0	0	1	0	0	0	no
3	3	high	suburban	hamsters	hamster	hamster	small mammal	mammal	3	0	boy	eigth	0	0	1	0	0	0	no
3	3	high	suburban	bunny rabits	rabbit	rabbit	rabbit	mammal	3	0	boy	eigth	0	0	1	0	0	0	no
3	3	high	suburban	squirrels	squirrel	squirrel	small mammal	mammal	2	1	boy	eigth	0	0	1	0	0	0	no
3	3	high	suburban	fox	fox	fox	canid	mammal	2	1	boy	eigth	0	0	0	0	1	0	no
3	3	high	suburban	moose	moose	moose	ungulate	mammal	1	0	boy	eigth	0	0	0	0	1	0	no
3	3	high	suburban	most snakes	most snake	snake	snake	reptile	2	1	boy	eigth	0	0	0	0	1	0	no
3	3	high	suburban	wolves	wolf	wolf	canid	mammal	1	0	boy	eigth	0	0	0	0	1	0	no
3	3	high	suburban	Deer	deer	deer	ungulate	mammal	2	1	girl	eigth	0	1	0	0	0	0	no
3	3	high	suburban	Panda	panda	panda	bear	mammal	1	0	girl	eigth	0	1	0	0	0	0	no
3	3	high	suburban	Polar bears	polar bear	polar bear	bear	mammal	1	0	girl	eigth	0	1	0	0	0	0	no
3	3	high	suburban	Rabbits	rabbit	rabbit	rabbit	mammal	3	0	girl	eigth	0	1	0	0	0	0	no
3	3	high	suburban	deer	deer	deer	ungulate	mammal	2	1	girl	eigth	0	0	1	0	0	0	no
3	3	high	suburban	elephant	elephant	elephant	African megafauna	mammal	1	0	girl	eigth	0	0	1	0	0	0	no
3	3	high	suburban	panda	panda	panda	bear	mammal	1	0	girl	eigth	0	0	1	0	0	0	no
3	3	high	suburban	baby tigers	baby tiger	tiger	big cat	mammal	1	0	girl	eigth	0	0	1	0	0	0	no
3	3	high	suburban	Deer	deer	deer	ungulate	mammal	2	1	girl	eigth	0	0	1	0	0	0	no
3	3	high	suburban	Elephants	elephant	elephant	African megafauna	mammal	1	0	girl	eigth	0	0	1	0	0	0	no
3	3	high	suburban	Koalas	koala	koala	marsupial	mammal	1	0	girl	eigth	0	0	1	0	0	0	no
3	3	high	suburban	Pandas	panda	panda	bear	mammal	1	0	girl	eigth	0	0	1	0	0	0	no
3	3	high	suburban	PUPPYS	baby dog	dog	dog	mammal	3	0	boy	eigth	0	0	0	0	0	1	no response
3	3	high	suburban	DOLPHINS	dolphin	dolphin	marine mammal	mammal	1	0	boy	eigth	0	0	0	0	0	1	no response
3	3	high	suburban	RABBITS	rabbit	rabbit	rabbit	mammal	3	0	boy	eigth	0	0	0	0	0	1	no response
3	3	high	suburban	WOLVES	wolf	wolf	canid	mammal	1	0	boy	eigth	0	0	0	0	0	1	no response
3	3	high	suburban	cats	cat	cat	cat	mammal	3	0	boy	eigth	0	0	1	0	0	0	no
3	3	high	suburban	dogs	dog	dog	dog	mammal	3	0	boy	eigth	0	0	1	0	0	0	no
3	3	high	suburban	hamsters	hamster	hamster	small mammal	mammal	3	0	boy	eigth	0	0	1	0	0	0	no
3	3	high	suburban	rabbits	rabbit	rabbit	rabbit	mammal	3	0	boy	eigth	0	0	1	0	0	0	no
3	3	high	suburban	Cheetah	cheetah	cheetah	felid	mammal	1	0	girl	eigth	0	0	0	0	1	0	no
3	3	high	suburban	Elephant	elephant	elephant	African megafauna	mammal	1	0	girl	eigth	0	0	0	0	1	0	no
3	3	high	suburban	Panda	panda	panda	bear	mammal	1	0	girl	eigth	0	0	0	0	1	0	no
3	3	high	suburban	Zebra	zebra	zebra	ungulate	mammal	1	0	girl	eigth	0	0	0	0	1	0	no
3	3	high	suburban	dogs	dog	dog	dog	mammal	3	0	girl	eigth	0	1	0	0	1	0	no
3	3	high	suburban	giraffe	giraffe	giraffe	African megafauna	mammal	1	0	girl	eigth	0	1	0	0	1	0	no
3	3	high	suburban	penguins	penguin	penguin	aquatic bird	bird	1	0	girl	eigth	0	1	0	0	1	0	no
3	3	high	suburban	zebras	zebra	zebra	ungulate	mammal	1	0	girl	eigth	0	1	0	0	1	0	no
3	3	high	suburban	cheetah	cheetah	cheetah	felid	mammal	1	0	boy	eigth	0	0	1	0	0	0	no
3	3	high	suburban	fox	fox	fox	canid	mammal	2	1	boy	eigth	0	0	1	0	0	0	no
3	3	high	suburban	snakes	snake	snake	snake	reptile	3	0	boy	eigth	0	0	1	0	0	0	no
3	3	high	suburban	wolves	wolf	wolf	canid	mammal	1	0	boy	eigth	0	0	1	0	0	0	no
3	3	high	suburban	cat	cat	cat	cat	mammal	3	0	boy	eigth	0	0	1	0	0	0	no
3	3	high	suburban	dogs	dog	dog	dog	mammal	3	0	boy	eigth	0	0	1	0	0	0	no
3	3	high	suburban	fish	fish	fish	fish	fish	3	0	boy	eigth	0	0	1	0	0	0	no
3	3	high	suburban	bunny	rabbit	rabbit	rabbit	mammal	3	0	boy	eigth	0	0	1	0	0	0	no
3	3	high	suburban	Birds	bird	bird	bird	bird	3	0	boy	eigth	0	1	0	0	0	0	no
3	3	high	suburban	Hammster	hamster	hamster	small mammal	mammal	3	0	boy	eigth	0	1	0	0	0	0	no
3	3	high	suburban	Rabbit	rabbit	rabbit	rabbit	mammal	3	0	boy	eigth	0	1	0	0	0	0	no
3	3	high	suburban	Squirls	squirrel	squirrel	small mammal	mammal	2	1	boy	eigth	0	1	0	0	0	0	no
3	3	high	suburban	dogs	dog	dog	dog	mammal	3	0	girl	eigth	0	0	1	0	0	0	no
3	3	high	suburban	owls	owl	owl	raptor or owl	bird	2	1	girl	eigth	0	0	1	0	0	0	no
3	3	high	suburban	Loins(cats)	lion	lion	big cat	mammal	1	0	girl	eigth	0	1	0	0	1	1	no
3	3	high	suburban	Owls	owl	owl	raptor or owl	bird	2	1	girl	eigth	0	1	0	0	1	1	no
3	3	high	suburban	Panda	panda	panda	bear	mammal	1	0	girl	eigth	0	1	0	0	1	1	no
3	3	high	suburban	Wolves(dogs)	wolf	wolf	canid	mammal	1	0	girl	eigth	0	1	0	0	1	1	no
3	3	high	suburban	Blob Fish	blobfish	blobfish	fish	fish	1	0	boy	eigth	0	0	0	0	1	1	no
3	3	high	suburban	Dogs	dog	dog	dog	mammal	3	0	boy	eigth	0	0	0	0	1	1	no
3	3	high	suburban	Turtles	turtle	turtle	turtle	reptile	3	0	boy	eigth	0	0	0	0	1	1	no
3	3	high	suburban	cheetahs	cheetah	cheetah	felid	mammal	1	0	boy	eigth	0	1	0	0	0	0	no
3	3	high	suburban	dolphins	dolphin	dolphin	marine mammal	mammal	1	0	boy	eigth	0	1	0	0	0	0	no
3	3	high	suburban	giraffes	giraffe	giraffe	African megafauna	mammal	1	0	boy	eigth	0	1	0	0	0	0	no
3	3	high	suburban	pandas	panda	panda	bear	mammal	1	0	boy	eigth	0	1	0	0	0	0	no
3	3	high	suburban	dog	dog	dog	dog	mammal	3	0	boy	eigth	0	0	1	0	0	0	no
3	3	high	suburban	lion	lion	lion	big cat	mammal	1	0	boy	eigth	0	0	1	0	0	0	no
3	3	high	suburban	tiger	tiger	tiger	big cat	mammal	1	0	boy	eigth	0	0	1	0	0	0	no
3	3	high	suburban	wolf	wolf	wolf	canid	mammal	1	0	boy	eigth	0	0	1	0	0	0	no
3	3	high	suburban	lions	lion	lion	big cat	mammal	1	0	boy	eigth	0	1	0	0	0	0	no
3	3	high	suburban	panthers	panther	panther	big cat	mammal	1	0	boy	eigth	0	1	0	0	0	0	no
3	3	high	suburban	snakes	snake	snake	snake	reptile	3	0	boy	eigth	0	1	0	0	0	0	no
3	3	high	suburban	tigers	tiger	tiger	big cat	mammal	1	0	boy	eigth	0	1	0	0	0	0	no
3	3	high	suburban	dolphin	dolphin	dolphin	marine mammal	mammal	1	0	girl	eigth	0	0	1	0	0	0	no
3	3	high	suburban	elephants	elephant	elephant	African megafauna	mammal	1	0	girl	eigth	0	0	1	0	0	0	no
3	3	high	suburban	girafe	giraffe	giraffe	African megafauna	mammal	1	0	girl	eigth	0	0	1	0	0	0	no
3	3	high	suburban	peacock	peacock	peacock	ground bird	bird	1	0	girl	eigth	0	0	1	0	0	0	no
3	3	high	suburban	bobcats	bobcat	bobcat	felid	mammal	0	1	boy	eigth	0	1	0	0	0	0	no
3	3	high	suburban	dogs	dog	dog	dog	mammal	3	0	boy	eigth	0	1	0	0	0	0	no
3	3	high	suburban	horeses	horse	horse	domestic ungulate	mammal	3	0	boy	eigth	0	1	0	0	0	0	no
3	3	high	suburban	kwala	koala	koala	marsupial	mammal	1	0	boy	eigth	0	1	0	0	0	0	no
3	3	high	suburban	foxes	fox	fox	canid	mammal	2	1	girl	eigth	0	0	1	0	0	0	no
3	3	high	suburban	owls	owl	owl	raptor or owl	bird	2	1	girl	eigth	0	0	1	0	0	0	no
3	3	high	suburban	pandas	panda	panda	bear	mammal	1	0	girl	eigth	0	0	1	0	0	0	no
3	3	high	suburban	tigers	tiger	tiger	big cat	mammal	1	0	girl	eigth	0	0	1	0	0	0	no
3	3	high	suburban	deer	deer	deer	ungulate	mammal	2	1	boy	eigth	0	1	0	1	1	0	no response
3	3	high	suburban	mantis shrimp	mantis shrimp	mantis shrimp	marine invertebrate	marine invertebrate	1	0	boy	eigth	0	1	0	1	1	0	no response
3	3	high	suburban	snakes	snake	snake	snake	reptile	3	0	boy	eigth	0	1	0	1	1	0	no response
3	3	high	suburban	wolf	wolf	wolf	canid	mammal	1	0	boy	eigth	0	1	0	1	1	0	no response
3	3	high	suburban	Dogs	dog	dog	dog	mammal	3	0	girl	eigth	0	0	1	0	0	0	no
3	3	high	suburban	Dogs	dog	dog	dog	mammal	3	0	girl	eigth	0	0	1	0	0	0	no
3	3	high	suburban	Panda	panda	panda	bear	mammal	1	0	girl	eigth	0	0	1	0	0	0	no
3	3	high	suburban	Bunnies	rabbit	rabbit	rabbit	mammal	3	0	girl	eigth	0	0	1	0	0	0	no
3	3	high	suburban	Zebra	zebra	zebra	ungulate	mammal	1	0	girl	eigth	0	0	1	0	0	0	no
3	3	high	suburban	birds	bird	bird	bird	bird	3	0	girl	eigth	0	0	1	0	0	0	no
3	3	high	suburban	dogs	dog	dog	dog	mammal	3	0	girl	eigth	0	0	1	0	0	0	no
3	3	high	suburban	horses and pandas (I had one more)	horse	horse	domestic ungulate	mammal	3	0	girl	eigth	0	0	1	0	0	0	no
3	3	high	suburban	whales	whale	whale	marine mammal	mammal	1	0	girl	eigth	0	0	1	0	0	0	no
3	3	high	suburban	dogs	dog	dog	dog	mammal	3	0	boy	eigth	0	1	0	0	0	0	no
3	3	high	suburban	lion	lion	lion	big cat	mammal	1	0	boy	eigth	0	1	0	0	0	0	no
3	3	high	suburban	bird	bird	bird	bird	bird	3	0	girl	eigth	0	0	1	0	0	0	no
3	3	high	suburban	dogs	dog	dog	dog	mammal	3	0	girl	eigth	0	0	1	0	0	0	no
3	3	high	suburban	bunny	rabbit	rabbit	rabbit	mammal	3	0	girl	eigth	0	0	1	0	0	0	no
3	3	high	suburban	rabbit	rabbit	rabbit	rabbit	mammal	3	0	girl	eigth	0	0	1	0	0	0	no
3	3	high	suburban	horses	horse	horse	domestic ungulate	mammal	3	0	girl	eigth	0	0	1	0	0	0	no
3	3	high	suburban	panda	panda	panda	bear	mammal	1	0	girl	eigth	0	0	1	0	0	0	no
3	3	high	suburban	rabbit	rabbit	rabbit	rabbit	mammal	3	0	girl	eigth	0	0	1	0	0	0	no
3	3	high	suburban	whale	whale	whale	marine mammal	mammal	1	0	girl	eigth	0	0	1	0	0	0	no
3	3	high	suburban	fox	fox	fox	canid	mammal	2	1	boy	eigth	0	0	1	0	0	0	no
3	3	high	suburban	penguin	penguin	penguin	aquatic bird	bird	1	0	boy	eigth	0	0	1	0	0	0	no
3	3	high	suburban	squirel	squirrel	squirrel	small mammal	mammal	2	1	boy	eigth	0	0	1	0	0	0	no
3	3	high	suburban	turtle	turtle	turtle	turtle	reptile	3	0	boy	eigth	0	0	1	0	0	0	no
3	3	high	suburban	cheetah	cheetah	cheetah	felid	mammal	1	0	girl	eigth	0	1	1	0	0	0	no
3	3	high	suburban	fox	fox	fox	canid	mammal	2	1	girl	eigth	0	1	1	0	0	0	no
3	3	high	suburban	Leopard	leopard	leopard	big cat	mammal	1	0	girl	eigth	0	1	1	0	0	0	no
3	3	high	suburban	panther	panther	panther	big cat	mammal	1	0	girl	eigth	0	1	1	0	0	0	no
3	3	high	suburban	Cats	cat	cat	cat	mammal	3	0	girl	eigth	0	1	0	0	1	0	no
3	3	high	suburban	Dogs	dog	dog	dog	mammal	3	0	girl	eigth	0	1	0	0	1	0	no
3	3	high	suburban	Fish	fish	fish	fish	fish	3	0	girl	eigth	0	1	0	0	1	0	no
3	3	high	suburban	Giraffes	giraffe	giraffe	African megafauna	mammal	1	0	girl	eigth	0	1	0	0	1	0	no
2	3	high	suburban	Betta Fish	betta fish	betta fish	fish	fish	1	0	boy	eigth	0	1	0	0	0	0	no
2	3	high	suburban	Crocodiles	crocodile	crocodile	alligator or crocodile	reptile	1	0	boy	eigth	0	1	0	0	0	0	no
2	3	high	suburban	Pandas	panda	panda	bear	mammal	1	0	boy	eigth	0	1	0	0	0	0	no
2	3	high	suburban	Panther	panther	panther	big cat	mammal	1	0	boy	eigth	0	1	0	0	0	0	no
1	4	high	exurban	some birds	some birds	bird	bird	bird	3	0	girl	eigth	0	1	0	0	0	0	no response
1	4	high	exurban	good dogs	good dog	dog	dog	mammal	3	0	girl	eigth	0	1	0	0	0	0	no response
1	4	high	exurban	fish	fish	fish	fish	fish	3	0	girl	eigth	0	1	0	0	0	0	no response
1	4	high	exurban	horses	horse	horse	domestic ungulate	mammal	3	0	girl	eigth	0	1	0	0	0	0	no response
1	4	high	exurban	cats	cat	cat	cat	mammal	3	0	girl	sixth	0	0	0	0	1	0	no response
1	4	high	exurban	dogs	dog	dog	dog	mammal	3	0	girl	sixth	0	0	0	0	1	0	no response
1	4	high	exurban	dolphin	dolphin	dolphin	marine mammal	mammal	1	0	girl	sixth	0	0	0	0	1	0	no response
1	4	high	exurban	snakes	snake	snake	snake	reptile	3	0	girl	sixth	0	0	0	0	1	0	no response
1	4	high	exurban	lion	lion	lion	big cat	mammal	1	0	boy	sixth	0	1	0	1	0	0	no response
1	4	high	exurban	panda	panda	panda	bear	mammal	1	0	boy	sixth	0	1	0	1	0	0	no response
1	4	high	exurban	tiger	tiger	tiger	big cat	mammal	1	0	boy	sixth	0	1	0	1	0	0	no response
1	4	high	exurban	zebra	zebra	zebra	ungulate	mammal	1	0	boy	sixth	0	1	0	1	0	0	no response
1	4	high	exurban	bobcat	bobcat	bobcat	felid	mammal	0	1	boy	sixth	0	0	0	0	1	0	no response
1	4	high	exurban	deer	deer	deer	ungulate	mammal	2	1	boy	sixth	0	0	0	0	1	0	no response
1	4	high	exurban	wolf	wolf	wolf	canid	mammal	1	0	boy	sixth	0	0	0	0	1	0	no response
1	4	high	exurban	zebra	zebra	zebra	ungulate	mammal	1	0	boy	sixth	0	0	0	0	1	0	no response
1	4	high	exurban	deer	deer	deer	ungulate	mammal	2	1	girl	sixth	0	0	0	0	1	0	no response
1	4	high	exurban	horses	horse	horse	domestic ungulate	mammal	3	0	girl	sixth	0	0	0	0	1	0	no response
1	4	high	exurban	turtles	turtle	turtle	turtle	reptile	3	0	girl	sixth	0	0	0	0	1	0	no response
1	4	high	exurban	wolves	wolf	wolf	canid	mammal	1	0	girl	sixth	0	0	0	0	1	0	no response
1	4	high	exurban	birds	bird	bird	bird	bird	3	0	boy	sixth	0	0	0	1	1	0	no response
1	4	high	exurban	cats	cat	cat	cat	mammal	3	0	boy	sixth	0	0	0	1	1	0	no response
1	4	high	exurban	deer	deer	deer	ungulate	mammal	2	1	boy	sixth	0	0	0	1	1	0	no response
1	4	high	exurban	dogs	dog	dog	dog	mammal	3	0	boy	sixth	0	0	0	1	1	0	no response
1	4	high	exurban	birds	bird	bird	bird	bird	3	0	girl	sixth	0	1	0	1	0	0	no response
1	4	high	exurban	cats	cat	cat	cat	mammal	3	0	girl	sixth	0	1	0	1	0	0	no response
1	4	high	exurban	dogs	dog	dog	dog	mammal	3	0	girl	sixth	0	1	0	1	0	0	no response
1	4	high	exurban	dolphin	dolphin	dolphin	marine mammal	mammal	1	0	girl	sixth	0	1	0	1	0	0	no response
1	4	high	exurban	cat	cat	cat	cat	mammal	3	0	boy	sixth	0	1	0	0	0	0	no response
1	4	high	exurban	dog	dog	dog	dog	mammal	3	0	boy	sixth	0	1	0	0	0	0	no response
1	4	high	exurban	horse	horse	horse	domestic ungulate	mammal	3	0	boy	sixth	0	1	0	0	0	0	no response
1	4	high	exurban	cat	cat	cat	cat	mammal	3	0	girl	sixth	0	1	0	0	1	0	no response
1	4	high	exurban	dog	dog	dog	dog	mammal	3	0	girl	sixth	0	1	0	0	1	0	no response
1	4	high	exurban	goat	goat	goat	domestic ungulate	mammal	3	0	girl	sixth	0	1	0	0	1	0	no response
1	4	high	exurban	kangaroo	kangaroo	kangaroo	marsupial	mammal	1	0	girl	sixth	0	1	0	0	1	0	no response
1	4	high	exurban	cat	cat	cat	cat	mammal	3	0	girl	sixth	0	0	1	0	0	0	no response
1	4	high	exurban	dog	dog	dog	dog	mammal	3	0	girl	sixth	0	0	1	0	0	0	no response
1	4	high	exurban	monkey	monkey	monkey	primate	mammal	1	0	girl	sixth	0	0	1	0	0	0	no response
1	4	high	exurban	wolf	wolf	wolf	canid	mammal	1	0	girl	sixth	0	0	1	0	0	0	no response
1	4	high	exurban	bird	bird	bird	bird	bird	3	0	boy	sixth	0	0	1	0	0	0	no response
1	4	high	exurban	cat	cat	cat	cat	mammal	3	0	boy	sixth	0	0	1	0	0	0	no response
1	4	high	exurban	dog	dog	dog	dog	mammal	3	0	boy	sixth	0	0	1	0	0	0	no response
1	4	high	exurban	spider	spider	spider	arachnid	terrestrial invertebrate	2	0	boy	sixth	0	0	1	0	0	0	no response
1	4	high	exurban	cat	cat	cat	cat	mammal	3	0	boy	sixth	0	1	0	0	1	0	no response
1	4	high	exurban	dog	dog	dog	dog	mammal	3	0	boy	sixth	0	1	0	0	1	0	no response
1	4	high	exurban	hamster	hamster	hamster	small mammal	mammal	3	0	boy	sixth	0	1	0	0	1	0	no response
1	4	high	exurban	bunny	rabbit	rabbit	rabbit	mammal	3	0	boy	sixth	0	1	0	0	1	0	no response
1	4	high	exurban	bat	bat	bat	bat	mammal	2	1	boy	sixth	0	1	0	0	1	0	no response
1	4	high	exurban	deer	deer	deer	ungulate	mammal	2	1	boy	sixth	0	1	0	0	1	0	no response
1	4	high	exurban	dog	dog	dog	dog	mammal	3	0	boy	sixth	0	1	0	0	1	0	no response
1	4	high	exurban	wolf	wolf	wolf	canid	mammal	1	0	boy	sixth	0	1	0	0	1	0	no response
1	4	high	exurban	cheetahs	cheetah	cheetah	felid	mammal	1	0	boy	sixth	0	0	0	0	1	0	no response
1	4	high	exurban	hyenas	hyena	hyena	other carnivore	mammal	1	0	boy	sixth	0	0	0	0	1	0	no response
1	4	high	exurban	lions	lion	lion	big cat	mammal	1	0	boy	sixth	0	0	0	0	1	0	no response
1	4	high	exurban	wolves	wolf	wolf	canid	mammal	1	0	boy	sixth	0	0	0	0	1	0	no response
1	4	high	exurban	bear	bear	bear	bear	mammal	2	1	boy	sixth	0	1	0	0	0	0	no response
1	4	high	exurban	lion	lion	lion	big cat	mammal	1	0	boy	sixth	0	1	0	0	0	0	no response
1	4	high	exurban	monkey	monkey	monkey	primate	mammal	1	0	boy	sixth	0	1	0	0	0	0	no response
1	4	high	exurban	wolf	wolf	wolf	canid	mammal	1	0	boy	sixth	0	1	0	0	0	0	no response
1	4	high	exurban	bat	bat	bat	bat	mammal	2	1	girl	sixth	0	0	0	0	1	0	no response
1	4	high	exurban	horse	horse	horse	domestic ungulate	mammal	3	0	girl	sixth	0	0	0	0	1	0	no response
1	4	high	exurban	rat	rat	rat	small mammal	mammal	2	0	girl	sixth	0	0	0	0	1	0	no response
1	4	high	exurban	wolf	wolf	wolf	canid	mammal	1	0	girl	sixth	0	0	0	0	1	0	no response
1	4	high	exurban	cat	cat	cat	cat	mammal	3	0	girl	sixth	0	0	0	0	1	0	no response
1	4	high	exurban	kitten	baby cat	cat	cat	mammal	3	0	girl	sixth	0	0	0	0	1	0	no response
1	4	high	exurban	dog	dog	dog	dog	mammal	3	0	girl	sixth	0	0	0	0	1	0	no response
1	4	high	exurban	puppy	baby dog	dog	dog	mammal	3	0	girl	sixth	0	0	0	0	1	0	no response
1	4	high	exurban	dogs	dog	dog	dog	mammal	3	0	boy	sixth	0	1	0	0	0	0	no response
1	4	high	exurban	horses	horse	horse	domestic ungulate	mammal	3	0	boy	sixth	0	1	0	0	0	0	no response
1	4	high	exurban	cat	cat	cat	cat	mammal	3	0	girl	sixth	0	0	1	1	1	0	no response
1	4	high	exurban	dog	dog	dog	dog	mammal	3	0	girl	sixth	0	0	1	1	1	0	no response
1	4	high	exurban	fish	fish	fish	fish	fish	3	0	girl	sixth	0	0	1	1	1	0	no response
1	4	high	exurban	seal	seal	seal	marine mammal	mammal	1	0	girl	sixth	0	0	1	1	1	0	no response
1	4	high	exurban	deer	deer	deer	ungulate	mammal	2	1	boy	sixth	0	0	0	0	1	0	no response
1	4	high	exurban	kangaroo	kangaroo	kangaroo	marsupial	mammal	1	0	boy	sixth	0	0	0	0	1	0	no response
1	4	high	exurban	lion	lion	lion	big cat	mammal	1	0	boy	sixth	0	0	0	0	1	0	no response
1	4	high	exurban	rabbit	rabbit	rabbit	rabbit	mammal	3	0	boy	sixth	0	0	0	0	1	0	no response
1	4	high	exurban	cats	cat	cat	cat	mammal	3	0	boy	sixth	0	1	0	0	0	0	no response
1	4	high	exurban	dogs	dog	dog	dog	mammal	3	0	boy	sixth	0	1	0	0	0	0	no response
1	4	high	exurban	jaguar	jaguar	jaguar	big cat	mammal	1	0	boy	sixth	0	1	0	0	0	0	no response
1	4	high	exurban	wolves	wolf	wolf	canid	mammal	1	0	boy	sixth	0	1	0	0	0	0	no response
1	4	high	exurban	deer	deer	deer	ungulate	mammal	2	1	girl	sixth	0	0	0	1	0	0	no response
1	4	high	exurban	fox	fox	fox	canid	mammal	2	1	girl	sixth	0	0	0	1	0	0	no response
1	4	high	exurban	pandas	panda	panda	bear	mammal	1	0	girl	sixth	0	0	0	1	0	0	no response
1	4	high	exurban	wolves	wolf	wolf	canid	mammal	1	0	girl	sixth	0	0	0	1	0	0	no response
1	4	high	exurban	cat	cat	cat	cat	mammal	3	0	girl	sixth	0	1	0	0	0	1	no response
1	4	high	exurban	dog	dog	dog	dog	mammal	3	0	girl	sixth	0	1	0	0	0	1	no response
1	4	high	exurban	rabbit	rabbit	rabbit	rabbit	mammal	3	0	girl	sixth	0	1	0	0	0	1	no response
1	4	high	exurban	sheep	sheep	sheep	domestic ungulate	mammal	3	0	girl	sixth	0	1	0	0	0	1	no response
1	4	high	exurban	coyote	coyote	coyote	canid	mammal	0	1	boy	sixth	0	0	0	0	1	0	no response
1	4	high	exurban	sharks	shark	shark	shark	fish	1	0	boy	sixth	0	0	0	0	1	0	no response
1	4	high	exurban	snakes	snake	snake	snake	reptile	3	0	boy	sixth	0	0	0	0	1	0	no response
1	4	high	exurban	wolf	wolf	wolf	canid	mammal	1	0	boy	sixth	0	0	0	0	1	0	no response
1	4	high	exurban	deer	deer	deer	ungulate	mammal	2	1	boy	sixth	0	1	0	0	0	0	no response
1	4	high	exurban	lion	lion	lion	big cat	mammal	1	0	boy	sixth	0	1	0	0	0	0	no response
1	4	high	exurban	meerkat	meerkat	meerkat	other carnivore	mammal	1	0	boy	sixth	0	1	0	0	0	0	no response
1	4	high	exurban	orca	orca	orca	marine mammal	mammal	1	0	boy	sixth	0	1	0	0	0	0	no response
1	4	high	exurban	dog	dog	dog	dog	mammal	3	0	boy	sixth	0	0	0	0	1	1	no response
1	4	high	exurban	dolphin	dolphin	dolphin	marine mammal	mammal	1	0	boy	sixth	0	0	0	0	1	1	no response
1	4	high	exurban	monkey	monkey	monkey	primate	mammal	1	0	boy	sixth	0	0	0	0	1	1	no response
1	4	high	exurban	squirrel	squirrel	squirrel	small mammal	mammal	2	1	boy	sixth	0	0	0	0	1	1	no response
1	4	high	exurban	birds	bird	bird	bird	bird	3	0	boy	sixth	0	0	0	0	1	0	no response
1	4	high	exurban	cats	cat	cat	cat	mammal	3	0	boy	sixth	0	0	0	0	1	0	no response
1	4	high	exurban	dogs	dog	dog	dog	mammal	3	0	boy	sixth	0	0	0	0	1	0	no response
1	4	high	exurban	hamsters	hamster	hamster	small mammal	mammal	3	0	boy	sixth	0	0	0	0	1	0	no response
1	4	high	exurban	cat	cat	cat	cat	mammal	3	0	boy	sixth	0	0	0	0	1	0	no response
1	4	high	exurban	dog	dog	dog	dog	mammal	3	0	boy	sixth	0	0	0	0	1	0	no response
1	4	high	exurban	tigers	tiger	tiger	big cat	mammal	1	0	boy	sixth	0	0	0	0	1	0	no response
1	4	high	exurban	wolf	wolf	wolf	canid	mammal	1	0	boy	sixth	0	0	0	0	1	0	no response
1	4	high	exurban	cat	cat	cat	cat	mammal	3	0	boy	sixth	0	1	0	0	0	0	no response
1	4	high	exurban	dog	dog	dog	dog	mammal	3	0	boy	sixth	0	1	0	0	0	0	no response
1	4	high	exurban	elephant	elephant	elephant	African megafauna	mammal	1	0	boy	sixth	0	1	0	0	0	0	no response
1	4	high	exurban	squirrel	squirrel	squirrel	small mammal	mammal	2	1	boy	sixth	0	1	0	0	0	0	no response
1	4	high	exurban	dog	dog	dog	dog	mammal	3	0	girl	sixth	0	0	0	0	1	0	no response
1	4	high	exurban	dolphin	dolphin	dolphin	marine mammal	mammal	1	0	girl	sixth	0	0	0	0	1	0	no response
1	4	high	exurban	peacock	peacock	peacock	ground bird	bird	1	0	girl	sixth	0	0	0	0	1	0	no response
1	4	high	exurban	zebra	zebra	zebra	ungulate	mammal	1	0	girl	sixth	0	0	0	0	1	0	no response
1	4	high	exurban	dolphin	dolphin	dolphin	marine mammal	mammal	1	0	girl	sixth	0	0	0	0	1	0	no response
1	4	high	exurban	giraff	giraffe	giraffe	African megafauna	mammal	1	0	girl	sixth	0	0	0	0	1	0	no response
1	4	high	exurban	panda	panda	panda	bear	mammal	1	0	girl	sixth	0	0	0	0	1	0	no response
1	4	high	exurban	zebra	zebra	zebra	ungulate	mammal	1	0	girl	sixth	0	0	0	0	1	0	no response
1	4	high	exurban	giraffe	giraffe	giraffe	African megafauna	mammal	1	0	girl	sixth	0	0	0	0	1	0	no response
1	4	high	exurban	monkey	monkey	monkey	primate	mammal	1	0	girl	sixth	0	0	0	0	1	0	no response
1	4	high	exurban	panda	panda	panda	bear	mammal	1	0	girl	sixth	0	0	0	0	1	0	no response
1	4	high	exurban	rabbits	rabbit	rabbit	rabbit	mammal	3	0	girl	sixth	0	0	0	0	1	0	no response
1	4	high	exurban	cats	cat	cat	cat	mammal	3	0	girl	sixth	0	1	0	0	1	1	no response
1	4	high	exurban	cheetahs	cheetah	cheetah	felid	mammal	1	0	girl	sixth	0	1	0	0	1	1	no response
1	4	high	exurban	dogs	dog	dog	dog	mammal	3	0	girl	sixth	0	1	0	0	1	1	no response
1	4	high	exurban	dolphins	dolphin	dolphin	marine mammal	mammal	1	0	girl	sixth	0	1	0	0	1	1	no response
1	4	high	exurban	dogs	dog	dog	dog	mammal	3	0	girl	sixth	0	1	0	0	0	0	no response
1	4	high	exurban	fish	fish	fish	fish	fish	3	0	girl	sixth	0	1	0	0	0	0	no response
1	4	high	exurban	horses	horse	horse	domestic ungulate	mammal	3	0	girl	sixth	0	1	0	0	0	0	no response
1	4	high	exurban	zebras	zebra	zebra	ungulate	mammal	1	0	girl	sixth	0	1	0	0	0	0	no response
1	4	high	exurban	cat	cat	cat	cat	mammal	3	0	girl	sixth	0	0	0	0	1	0	no response
1	4	high	exurban	dog	dog	dog	dog	mammal	3	0	girl	sixth	0	0	0	0	1	0	no response
1	4	high	exurban	horse	horse	horse	domestic ungulate	mammal	3	0	girl	sixth	0	0	0	0	1	0	no response
1	4	high	exurban	turtle	turtle	turtle	turtle	reptile	3	0	girl	sixth	0	0	0	0	1	0	no response
1	4	high	exurban	kittens	baby cat	cat	cat	mammal	3	0	girl	sixth	0	1	0	1	0	0	no response
1	4	high	exurban	small dogs	small dog	dog	dog	mammal	3	0	girl	sixth	0	1	0	1	0	0	no response
1	4	high	exurban	bird	bird	bird	bird	bird	3	0	girl	sixth	0	0	1	0	0	0	no response
1	4	high	exurban	cats	cat	cat	cat	mammal	3	0	girl	sixth	0	0	1	0	0	0	no response
1	4	high	exurban	chicken	chicken	chicken	ground bird	bird	3	0	girl	sixth	0	0	1	0	0	0	no response
1	4	high	exurban	bunnies	rabbit	rabbit	rabbit	mammal	3	0	girl	sixth	0	0	1	0	0	0	no response
1	4	high	exurban	cheetah	cheetah	cheetah	felid	mammal	1	0	boy	sixth	0	0	1	0	0	0	no response
1	4	high	exurban	falcon	falcon	falcon	raptor or owl	bird	2	1	boy	sixth	0	0	1	0	0	0	no response
1	4	high	exurban	rabbit	rabbit	rabbit	rabbit	mammal	3	0	boy	sixth	0	0	1	0	0	0	no response
1	4	high	exurban	wolf	wolf	wolf	canid	mammal	1	0	boy	sixth	0	0	1	0	0	0	no response
1	4	high	exurban	cat	cat	cat	cat	mammal	3	0	girl	sixth	0	1	0	0	0	0	no response
1	4	high	exurban	dog	dog	dog	dog	mammal	3	0	girl	sixth	0	1	0	0	0	0	no response
1	4	high	exurban	panda	panda	panda	bear	mammal	1	0	girl	sixth	0	1	0	0	0	0	no response
1	4	high	exurban	rabbit	rabbit	rabbit	rabbit	mammal	3	0	girl	sixth	0	1	0	0	0	0	no response
1	4	high	exurban	cats	cat	cat	cat	mammal	3	0	boy	sixth	0	0	0	0	1	1	no response
1	4	high	exurban	pommeranians	pommeranian	dog	dog	mammal	3	0	boy	sixth	0	0	0	0	1	1	no response
1	4	high	exurban	penguins	penguin	penguin	aquatic bird	bird	1	0	boy	sixth	0	0	0	0	1	1	no response
1	4	high	exurban	bunny	rabbit	rabbit	rabbit	mammal	3	0	boy	sixth	0	0	0	0	1	1	no response
1	4	high	exurban	horse	horse	horse	domestic ungulate	mammal	3	0	boy	sixth	0	0	0	1	1	0	no response
1	4	high	exurban	lion	lion	lion	big cat	mammal	1	0	boy	sixth	0	0	0	1	1	0	no response
1	4	high	exurban	tiger	tiger	tiger	big cat	mammal	1	0	boy	sixth	0	0	0	1	1	0	no response
1	4	high	exurban	wolf	wolf	wolf	canid	mammal	1	0	boy	sixth	0	0	0	1	1	0	no response
1	4	high	exurban	cats	cat	cat	cat	mammal	3	0	boy	sixth	0	1	0	0	0	0	no response
1	4	high	exurban	dogs	dog	dog	dog	mammal	3	0	boy	sixth	0	1	0	0	0	0	no response
1	4	high	exurban	lion	lion	lion	big cat	mammal	1	0	boy	sixth	0	1	0	0	0	0	no response
1	4	high	exurban	wolves	wolf	wolf	canid	mammal	1	0	boy	sixth	0	1	0	0	0	0	no response
1	4	high	exurban	deer	deer	deer	ungulate	mammal	2	1	boy	sixth	0	0	0	0	1	0	no response
1	4	high	exurban	dogs	dog	dog	dog	mammal	3	0	boy	sixth	0	0	0	0	1	0	no response
1	4	high	exurban	lion	lion	lion	big cat	mammal	1	0	boy	sixth	0	0	0	0	1	0	no response
1	4	high	exurban	rhinoceros	rhinoceros	rhinoceros	African megafauna	mammal	1	0	boy	sixth	0	0	0	0	1	0	no response
1	4	high	exurban	dog	dog	dog	dog	mammal	3	0	girl	sixth	0	1	0	0	0	0	no response
1	4	high	exurban	lion	lion	lion	big cat	mammal	1	0	girl	sixth	0	1	0	0	0	0	no response
1	4	high	exurban	panda	panda	panda	bear	mammal	1	0	girl	sixth	0	1	0	0	0	0	no response
1	4	high	exurban	zebra	zebra	zebra	ungulate	mammal	1	0	girl	sixth	0	1	0	0	0	0	no response
1	4	high	exurban	deer	deer	deer	ungulate	mammal	2	1	boy	sixth	0	0	0	0	1	0	no response
1	4	high	exurban	dove	dove	dove	songbird or parrot	bird	2	1	boy	sixth	0	0	0	0	1	0	no response
1	4	high	exurban	turkey	turkey	turkey	ground bird	bird	3	0	boy	sixth	0	0	0	0	1	0	no response
1	4	high	exurban	wolf	wolf	wolf	canid	mammal	1	0	boy	sixth	0	0	0	0	1	0	no response
1	4	high	exurban	cats	cat	cat	cat	mammal	3	0	girl	sixth	0	1	0	0	0	0	no response
1	4	high	exurban	chimpanzees	chimpanzee	chimpanzee	primate	mammal	1	0	girl	sixth	0	1	0	0	0	0	no response
1	4	high	exurban	puppies	baby dog	dog	dog	mammal	3	0	girl	sixth	0	1	0	0	0	0	no response
1	4	high	exurban	squirrels	squirrel	squirrel	small mammal	mammal	2	1	girl	sixth	0	1	0	0	0	0	no response
1	4	high	exurban	deer	deer	deer	ungulate	mammal	2	1	boy	sixth	0	0	0	0	1	0	no response
1	4	high	exurban	dog	dog	dog	dog	mammal	3	0	boy	sixth	0	0	0	0	1	0	no response
1	4	high	exurban	monkey	monkey	monkey	primate	mammal	1	0	boy	sixth	0	0	0	0	1	0	no response
1	4	high	exurban	rabbit	rabbit	rabbit	rabbit	mammal	3	0	boy	sixth	0	0	0	0	1	0	no response
1	4	high	exurban	dogs	dog	dog	dog	mammal	3	0	boy	sixth	0	1	0	0	0	0	no response
1	4	high	exurban	frogs	frog	frog	amphibian	amphibian	2	0	boy	sixth	0	1	0	0	0	0	no response
1	4	high	exurban	lion	lion	lion	big cat	mammal	1	0	boy	sixth	0	1	0	0	0	0	no response
1	4	high	exurban	monkey	monkey	monkey	primate	mammal	1	0	boy	sixth	0	1	0	0	0	0	no response
1	4	high	exurban	cats	cat	cat	cat	mammal	3	0	girl	sixth	0	0	0	0	1	0	no response
1	4	high	exurban	dogs	dog	dog	dog	mammal	3	0	girl	sixth	0	0	0	0	1	0	no response
1	4	high	exurban	dolphins	dolphin	dolphin	marine mammal	mammal	1	0	girl	sixth	0	0	0	0	1	0	no response
1	4	high	exurban	sharks	shark	shark	shark	fish	1	0	girl	sixth	0	0	0	0	1	0	no response
1	4	high	exurban	cheetah	cheetah	cheetah	felid	mammal	1	0	boy	sixth	0	1	0	1	0	0	no response
1	4	high	exurban	pitbull	pitbull	dog	dog	mammal	3	0	boy	sixth	0	1	0	1	0	0	no response
1	4	high	exurban	rottweiler	rottweiler	dog	dog	mammal	3	0	boy	sixth	0	1	0	1	0	0	no response
1	4	high	exurban	rabbit	rabbit	rabbit	rabbit	mammal	3	0	boy	sixth	0	1	0	1	0	0	no response
1	4	high	exurban	deer	deer	deer	ungulate	mammal	2	1	boy	sixth	0	0	0	0	1	0	no response
1	4	high	exurban	lions	lion	lion	big cat	mammal	1	0	boy	sixth	0	0	0	0	1	0	no response
1	4	high	exurban	moose	moose	moose	ungulate	mammal	1	0	boy	sixth	0	0	0	0	1	0	no response
1	4	high	exurban	mule deer	mule deer	mule deer	ungulate	mammal	1	0	boy	sixth	0	0	0	0	1	0	no response
1	4	high	exurban	fox	fox	fox	canid	mammal	2	1	girl	sixth	0	0	0	0	1	0	no response
1	4	high	exurban	tigers	tiger	tiger	big cat	mammal	1	0	girl	sixth	0	0	0	0	1	0	no response
1	4	high	exurban	whales	whale	whale	marine mammal	mammal	1	0	girl	sixth	0	0	0	0	1	0	no response
1	4	high	exurban	wolf	wolf	wolf	canid	mammal	1	0	girl	sixth	0	0	0	0	1	0	no response
1	4	high	exurban	poodle	poodle	dog	dog	mammal	3	0	girl	sixth	0	1	0	0	0	0	no response
1	4	high	exurban	puppy	baby dog	dog	dog	mammal	3	0	girl	sixth	0	1	0	0	0	0	no response
1	4	high	exurban	guinea pig	guinea pig	guinea pig	small mammal	mammal	3	0	girl	sixth	0	1	0	0	0	0	no response
1	4	high	exurban	hamster	hamster	hamster	small mammal	mammal	3	0	girl	sixth	0	1	0	0	0	0	no response
1	4	high	exurban	cat	cat	cat	cat	mammal	3	0	boy	sixth	0	0	0	0	1	0	no response
1	4	high	exurban	dog	dog	dog	dog	mammal	3	0	boy	sixth	0	0	0	0	1	0	no response
1	4	high	exurban	hamster	hamster	hamster	small mammal	mammal	3	0	boy	sixth	0	0	0	0	1	0	no response
1	4	high	exurban	bunny	rabbit	rabbit	rabbit	mammal	3	0	boy	sixth	0	0	0	0	1	0	no response
1	4	high	exurban	puppies	baby dog	dog	dog	mammal	3	0	girl	sixth	0	1	0	0	0	0	no response
1	4	high	exurban	horse	horse	horse	domestic ungulate	mammal	3	0	girl	sixth	0	1	0	0	0	0	no response
1	4	high	exurban	kangaroo	kangaroo	kangaroo	marsupial	mammal	1	0	girl	sixth	0	1	0	0	0	0	no response
1	4	high	exurban	lion	lion	lion	big cat	mammal	1	0	girl	sixth	0	1	0	0	0	0	no response
1	4	high	exurban	chickens	chicken	chicken	ground bird	bird	3	0	girl	sixth	0	0	0	1	1	0	no response
1	4	high	exurban	cows	cow	cow	domestic ungulate	mammal	3	0	girl	sixth	0	0	0	1	1	0	no response
1	4	high	exurban	hamsters	hamster	hamster	small mammal	mammal	3	0	girl	sixth	0	0	0	1	1	0	no response
1	4	high	exurban	horses	horse	horse	domestic ungulate	mammal	3	0	girl	sixth	0	0	0	1	1	0	no response
1	4	high	exurban	puppies	baby dog	dog	dog	mammal	3	0	girl	sixth	0	1	0	0	0	0	no response
1	4	high	exurban	black panthers	black panther	black panther	big cat	mammal	1	0	girl	sixth	0	0	0	0	1	0	no response
1	4	high	exurban	cats	cat	cat	cat	mammal	3	0	girl	sixth	0	0	0	0	1	0	no response
1	4	high	exurban	dogs	dog	dog	dog	mammal	3	0	girl	sixth	0	0	0	0	1	0	no response
1	4	high	exurban	leopards	leopard	leopard	big cat	mammal	1	0	girl	sixth	0	0	0	0	1	0	no response
1	4	high	exurban	bulldog	bulldog	dog	dog	mammal	3	0	boy	sixth	0	0	0	0	0	0	no response
1	4	high	exurban	puppy	baby dog	dog	dog	mammal	3	0	boy	sixth	0	0	0	0	0	0	no response
1	4	high	exurban	puppy	baby dog	dog	dog	mammal	3	0	girl	sixth	0	0	0	0	1	0	no response
1	4	high	exurban	dolphin	dolphin	dolphin	marine mammal	mammal	1	0	girl	sixth	0	0	0	0	1	0	no response
1	4	high	exurban	snakes	snake	snake	snake	reptile	3	0	girl	sixth	0	0	0	0	1	0	no response
1	4	high	exurban	spiders	spider	spider	arachnid	terrestrial invertebrate	2	0	girl	sixth	0	0	0	0	1	0	no response
1	4	high	exurban	deer	deer	deer	ungulate	mammal	2	1	girl	sixth	0	1	0	0	0	0	no response
1	4	high	exurban	fox	fox	fox	canid	mammal	2	1	girl	sixth	0	1	0	0	0	0	no response
1	4	high	exurban	kangaroo	kangaroo	kangaroo	marsupial	mammal	1	0	girl	sixth	0	1	0	0	0	0	no response
1	4	high	exurban	wolf	wolf	wolf	canid	mammal	1	0	girl	sixth	0	1	0	0	0	0	no response
1	4	high	exurban	bird	bird	bird	bird	bird	3	0	no response	sixth	0	1	0	0	0	0	no response
1	4	high	exurban	fish	fish	fish	fish	fish	3	0	no response	sixth	0	1	0	0	0	0	no response
1	4	high	exurban	goat	goat	goat	domestic ungulate	mammal	3	0	no response	sixth	0	1	0	0	0	0	no response
1	4	high	exurban	shark	shark	shark	shark	fish	1	0	no response	sixth	0	1	0	0	0	0	no response
1	4	high	exurban	dog	dog	dog	dog	mammal	3	0	boy	sixth	0	1	0	0	0	0	no response
1	4	high	exurban	fox	fox	fox	canid	mammal	2	1	boy	sixth	0	1	0	0	0	0	no response
1	4	high	exurban	lion	lion	lion	big cat	mammal	1	0	boy	sixth	0	1	0	0	0	0	no response
1	4	high	exurban	monkey	monkey	monkey	primate	mammal	1	0	boy	sixth	0	1	0	0	0	0	no response
1	4	high	exurban	cats	cat	cat	cat	mammal	3	0	girl	sixth	0	0	0	0	1	1	no response
1	4	high	exurban	dogs	dog	dog	dog	mammal	3	0	girl	sixth	0	0	0	0	1	1	no response
1	4	high	exurban	dolphins	dolphin	dolphin	marine mammal	mammal	1	0	girl	sixth	0	0	0	0	1	1	no response
1	4	high	exurban	tutrles	turtle	turtle	turtle	reptile	3	0	girl	sixth	0	0	0	0	1	1	no response
1	4	high	exurban	bobcat	bobcat	bobcat	felid	mammal	0	1	girl	sixth	0	1	0	0	0	0	no response
1	4	high	exurban	jaguar	jaguar	jaguar	big cat	mammal	1	0	girl	sixth	0	1	0	0	0	0	no response
1	4	high	exurban	kangaroo	kangaroo	kangaroo	marsupial	mammal	1	0	girl	sixth	0	1	0	0	0	0	no response
1	4	high	exurban	lion	lion	lion	big cat	mammal	1	0	girl	sixth	0	1	0	0	0	0	no response
1	4	high	exurban	butterfly	butterfly	butterfly	butterfly	terrestrial invertebrate	2	1	girl	sixth	0	0	1	0	1	0	no response
1	4	high	exurban	dog	dog	dog	dog	mammal	3	0	girl	sixth	0	0	1	0	1	0	no response
1	4	high	exurban	frog	frog	frog	amphibian	amphibian	2	0	girl	sixth	0	0	1	0	1	0	no response
1	4	high	exurban	zebra	zebra	zebra	ungulate	mammal	1	0	girl	sixth	0	0	1	0	1	0	no response
1	4	high	exurban	kittens	baby cat	cat	cat	mammal	3	0	girl	sixth	0	1	0	0	0	0	no response
1	4	high	exurban	small dogs	small dog	dog	dog	mammal	3	0	girl	sixth	0	1	0	0	0	0	no response
1	4	high	exurban	guinea pigs	guinea pig	guinea pig	small mammal	mammal	3	0	girl	sixth	0	1	0	0	0	0	no response
1	4	high	exurban	hamsters	hamster	hamster	small mammal	mammal	3	0	girl	sixth	0	1	0	0	0	0	no response
1	4	high	exurban	cheetah	cheetah	cheetah	felid	mammal	1	0	girl	sixth	0	0	0	0	0	1	no response
1	4	high	exurban	jaguar	jaguar	jaguar	big cat	mammal	1	0	girl	sixth	0	0	0	0	0	1	no response
1	4	high	exurban	pigeon	pigeon	pigeon	songbird or parrot	bird	1	0	girl	sixth	0	0	0	0	0	1	no response
1	4	high	exurban	wolves	wolf	wolf	canid	mammal	1	0	girl	sixth	0	0	0	0	0	1	no response
1	4	high	exurban	puppy	baby dog	dog	dog	mammal	3	0	girl	sixth	0	1	0	0	0	0	no response
1	4	high	exurban	fish	fish	fish	fish	fish	3	0	girl	sixth	0	1	0	1	0	0	no response
1	4	high	exurban	white tiger	white tiger	tiger	big cat	mammal	1	0	girl	sixth	0	1	0	1	0	0	no response
1	4	high	exurban	turtle	turtle	turtle	turtle	reptile	3	0	girl	sixth	0	1	0	1	0	0	no response
1	4	high	exurban	whale	whale	whale	marine mammal	mammal	1	0	girl	sixth	0	1	0	1	0	0	no response
1	4	high	exurban	cheetahs	cheetah	cheetah	felid	mammal	1	0	girl	sixth	0	1	0	0	1	0	no response
1	4	high	exurban	dogs	dog	dog	dog	mammal	3	0	girl	sixth	0	1	0	0	1	0	no response
1	4	high	exurban	pandas	panda	panda	bear	mammal	1	0	girl	sixth	0	1	0	0	1	0	no response
1	4	high	exurban	zebras	zebra	zebra	ungulate	mammal	1	0	girl	sixth	0	1	0	0	1	0	no response
1	5	high	exurban	cats	cat	cat	cat	mammal	3	0	girl	sixth	0	0	0	0	1	0	no response
1	5	high	exurban	dogs	dog	dog	dog	mammal	3	0	girl	sixth	0	0	0	0	1	0	no response
1	5	high	exurban	jaguars	jaguar	jaguar	big cat	mammal	1	0	girl	sixth	0	0	0	0	1	0	no response
1	5	high	exurban	panda	panda	panda	bear	mammal	1	0	girl	sixth	0	0	0	0	1	0	no response
1	5	high	exurban	bobcat	bobcat	bobcat	felid	mammal	0	1	boy	sixth	0	1	0	0	0	1	no response
1	5	high	exurban	dog	dog	dog	dog	mammal	3	0	boy	sixth	0	1	0	0	0	1	no response
1	5	high	exurban	monkey	monkey	monkey	primate	mammal	1	0	boy	sixth	0	1	0	0	0	1	no response
1	5	high	exurban	zebra	zebra	zebra	ungulate	mammal	1	0	boy	sixth	0	1	0	0	0	1	no response
1	5	high	exurban	cat	cat	cat	cat	mammal	3	0	girl	sixth	0	1	0	0	1	0	no response
1	5	high	exurban	chickens	chicken	chicken	ground bird	bird	3	0	girl	sixth	0	1	0	0	1	0	no response
1	5	high	exurban	dog	dog	dog	dog	mammal	3	0	girl	sixth	0	1	0	0	1	0	no response
1	5	high	exurban	goose	goose	goose	aquatic bird	bird	2	1	girl	sixth	0	1	0	0	1	0	no response
1	5	high	exurban	deer	deer	deer	ungulate	mammal	2	1	boy	sixth	0	0	0	0	1	0	no response
1	5	high	exurban	fox	fox	fox	canid	mammal	2	1	boy	sixth	0	0	0	0	1	0	no response
1	5	high	exurban	snake	snake	snake	snake	reptile	3	0	boy	sixth	0	0	0	0	1	0	no response
1	5	high	exurban	wolf	wolf	wolf	canid	mammal	1	0	boy	sixth	0	0	0	0	1	0	no response
1	5	high	exurban	bird	bird	bird	bird	bird	3	0	girl	sixth	0	0	0	1	1	1	no response
1	5	high	exurban	cat	cat	cat	cat	mammal	3	0	girl	sixth	0	0	0	1	1	1	no response
1	5	high	exurban	dog	dog	dog	dog	mammal	3	0	girl	sixth	0	0	0	1	1	1	no response
1	5	high	exurban	monkey	monkey	monkey	primate	mammal	1	0	girl	sixth	0	0	0	1	1	1	no response
1	5	high	exurban	bird	bird	bird	bird	bird	3	0	girl	sixth	0	0	0	0	1	0	no response
1	5	high	exurban	cat	cat	cat	cat	mammal	3	0	girl	sixth	0	0	0	0	1	0	no response
1	5	high	exurban	dog	dog	dog	dog	mammal	3	0	girl	sixth	0	0	0	0	1	0	no response
1	5	high	exurban	monkey	monkey	monkey	primate	mammal	1	0	girl	sixth	0	0	0	0	1	0	no response
1	5	high	exurban	alligators	alligator	alligator	alligator or crocodile	reptile	1	0	boy	sixth	0	0	0	1	0	0	no response
1	5	high	exurban	sharks	shark	shark	shark	fish	1	0	boy	sixth	0	0	0	1	0	0	no response
1	5	high	exurban	snakes	snake	snake	snake	reptile	3	0	boy	sixth	0	0	0	1	0	0	no response
1	5	high	exurban	birds	bird	bird	bird	bird	3	0	girl	sixth	0	1	0	0	0	0	no response
1	5	high	exurban	dogs	dog	dog	dog	mammal	3	0	girl	sixth	0	1	0	0	0	0	no response
1	5	high	exurban	guinea pigs	guinea pig	guinea pig	small mammal	mammal	3	0	girl	sixth	0	1	0	0	0	0	no response
1	5	high	exurban	rabbits	rabbit	rabbit	rabbit	mammal	3	0	girl	sixth	0	1	0	0	0	0	no response
1	5	high	exurban	birds	bird	bird	bird	bird	3	0	boy	sixth	0	0	0	1	1	0	no response
1	5	high	exurban	horses	horse	horse	domestic ungulate	mammal	3	0	boy	sixth	0	0	0	1	1	0	no response
1	5	high	exurban	monkey	monkey	monkey	primate	mammal	1	0	boy	sixth	0	0	0	1	1	0	no response
1	5	high	exurban	wolves	wolf	wolf	canid	mammal	1	0	boy	sixth	0	0	0	1	1	0	no response
1	5	high	exurban	birds	bird	bird	bird	bird	3	0	boy	sixth	0	0	0	0	1	0	no response
1	5	high	exurban	cats	cat	cat	cat	mammal	3	0	boy	sixth	0	0	0	0	1	0	no response
1	5	high	exurban	dogs	dog	dog	dog	mammal	3	0	boy	sixth	0	0	0	0	1	0	no response
1	5	high	exurban	rabbits	rabbit	rabbit	rabbit	mammal	3	0	boy	sixth	0	0	0	0	1	0	no response
1	5	high	exurban	penguin	penguin	penguin	aquatic bird	bird	1	0	boy	sixth	0	0	0	0	1	0	no response
1	5	high	exurban	turtle	turtle	turtle	turtle	reptile	3	0	boy	sixth	0	0	0	0	1	0	no response
1	5	high	exurban	cat	cat	cat	cat	mammal	3	0	boy	sixth	0	0	0	0	1	0	no response
1	5	high	exurban	dog	dog	dog	dog	mammal	3	0	boy	sixth	0	0	0	0	1	0	no response
1	5	high	exurban	fish	fish	fish	fish	fish	3	0	boy	sixth	0	0	0	0	1	0	no response
1	5	high	exurban	hamster	hamster	hamster	small mammal	mammal	3	0	boy	sixth	0	0	0	0	1	0	no response
1	5	high	exurban	cats	cat	cat	cat	mammal	3	0	boy	sixth	0	0	0	1	1	0	no response
1	5	high	exurban	dogs	dog	dog	dog	mammal	3	0	boy	sixth	0	0	0	1	1	0	no response
1	5	high	exurban	snakes	snake	snake	snake	reptile	3	0	boy	sixth	0	0	0	1	1	0	no response
1	5	high	exurban	wolf	wolf	wolf	canid	mammal	1	0	boy	sixth	0	0	0	1	1	0	no response
1	5	high	exurban	cats	cat	cat	cat	mammal	3	0	boy	sixth	0	0	0	1	1	1	no response
1	5	high	exurban	dogs (pitbull and lab mix)	dog	dog	dog	mammal	3	0	boy	sixth	0	0	0	1	1	1	no response
1	5	high	exurban	penguins	penguin	penguin	aquatic bird	bird	1	0	boy	sixth	0	0	0	1	1	1	no response
1	5	high	exurban	sharks	shark	shark	shark	fish	1	0	boy	sixth	0	0	0	1	1	1	no response
1	5	high	exurban	black widow	black widow	black widow	arachnid	terrestrial invertebrate	0	1	no response	sixth	0	0	0	0	0	0	no response
1	5	high	exurban	sharks	shark	shark	shark	fish	1	0	no response	sixth	0	0	0	0	0	0	no response
1	5	high	exurban	snakes	snake	snake	snake	reptile	3	0	no response	sixth	0	0	0	0	0	0	no response
1	5	high	exurban	tarantulas	tarantula	tarantula	arachnid	terrestrial invertebrate	1	0	no response	sixth	0	0	0	0	0	0	no response
1	5	high	exurban	fox	fox	fox	canid	mammal	2	1	girl	sixth	0	0	0	0	1	0	no response
1	5	high	exurban	lion	lion	lion	big cat	mammal	1	0	girl	sixth	0	0	0	0	1	0	no response
1	5	high	exurban	raccoon	raccoon	raccoon	other carnivore	mammal	0	1	girl	sixth	0	0	0	0	1	0	no response
1	5	high	exurban	wolf	wolf	wolf	canid	mammal	1	0	girl	sixth	0	0	0	0	1	0	no response
1	5	high	exurban	cats	cat	cat	cat	mammal	3	0	girl	sixth	0	0	0	0	0	1	no response
1	5	high	exurban	dogs	dog	dog	dog	mammal	3	0	girl	sixth	0	0	0	0	0	1	no response
1	5	high	exurban	dolphins	dolphin	dolphin	marine mammal	mammal	1	0	girl	sixth	0	0	0	0	0	1	no response
1	5	high	exurban	whale	whale	whale	marine mammal	mammal	1	0	girl	sixth	0	0	0	0	0	1	no response
1	5	high	exurban	bobcat	bobcat	bobcat	felid	mammal	0	1	girl	sixth	0	0	0	1	1	0	no response
1	5	high	exurban	deer	deer	deer	ungulate	mammal	2	1	girl	sixth	0	0	0	1	1	0	no response
1	5	high	exurban	dogs	dog	dog	dog	mammal	3	0	girl	sixth	0	0	0	1	1	0	no response
1	5	high	exurban	wolf	wolf	wolf	canid	mammal	1	0	girl	sixth	0	0	0	1	1	0	no response
1	5	high	exurban	foxes	fox	fox	canid	mammal	2	1	girl	sixth	0	0	0	1	1	0	no response
1	5	high	exurban	manatees	manatee	manatee	marine mammal	mammal	1	0	girl	sixth	0	0	0	1	1	0	no response
1	5	high	exurban	orcas	orca	orca	marine mammal	mammal	1	0	girl	sixth	0	0	0	1	1	0	no response
1	5	high	exurban	polar bears	polar bear	polar bear	bear	mammal	1	0	girl	sixth	0	0	0	1	1	0	no response
1	5	high	exurban	cheetah	cheetah	cheetah	felid	mammal	1	0	boy	sixth	0	0	1	0	0	0	no response
1	5	high	exurban	lion	lion	lion	big cat	mammal	1	0	boy	sixth	0	0	1	0	0	0	no response
1	5	high	exurban	sharks	shark	shark	shark	fish	1	0	boy	sixth	0	0	1	0	0	0	no response
1	5	high	exurban	whale	whale	whale	marine mammal	mammal	1	0	boy	sixth	0	0	1	0	0	0	no response
1	5	high	exurban	kangaroo	kangaroo	kangaroo	marsupial	mammal	1	0	girl	sixth	0	1	0	0	0	0	no response
1	5	high	exurban	monkey	monkey	monkey	primate	mammal	1	0	girl	sixth	0	1	0	0	0	0	no response
1	5	high	exurban	whale	whale	whale	marine mammal	mammal	1	0	girl	sixth	0	1	0	0	0	0	no response
1	5	high	exurban	zebra	zebra	zebra	ungulate	mammal	1	0	girl	sixth	0	1	0	0	0	0	no response
1	5	high	exurban	armadillo	armadillo	armadillo	anteater, sloth, armadillo	mammal	1	0	boy	sixth	0	0	0	0	1	0	no response
1	5	high	exurban	cat	cat	cat	cat	mammal	3	0	boy	sixth	0	0	0	0	1	0	no response
1	5	high	exurban	iguana	iguana	iguana	lizard	reptile	1	0	boy	sixth	0	0	0	0	1	0	no response
1	5	high	exurban	wolf	wolf	wolf	canid	mammal	1	0	boy	sixth	0	0	0	0	1	0	no response
1	5	high	exurban	cheetah	cheetah	cheetah	felid	mammal	1	0	boy	sixth	0	0	1	0	0	0	no response
1	5	high	exurban	cougar	cougar	cougar	big cat	mammal	1	0	boy	sixth	0	0	1	0	0	0	no response
1	5	high	exurban	falcon	falcon	falcon	raptor or owl	bird	2	1	boy	sixth	0	0	1	0	0	0	no response
1	5	high	exurban	lion	lion	lion	big cat	mammal	1	0	boy	sixth	0	0	1	0	0	0	no response
1	5	high	exurban	chinchillas	chinchilla	chinchilla	small mammal	mammal	3	0	girl	sixth	0	0	0	1	1	0	no response
1	5	high	exurban	dolphins	dolphin	dolphin	marine mammal	mammal	1	0	girl	sixth	0	0	0	1	1	0	no response
1	5	high	exurban	orcas	orca	orca	marine mammal	mammal	1	0	girl	sixth	0	0	0	1	1	0	no response
1	5	high	exurban	wolves	wolf	wolf	canid	mammal	1	0	girl	sixth	0	0	0	1	1	0	no response
1	5	high	exurban	deer	deer	deer	ungulate	mammal	2	1	boy	sixth	0	0	0	0	1	0	no response
1	5	high	exurban	dogs	dog	dog	dog	mammal	3	0	boy	sixth	0	0	0	0	1	0	no response
1	5	high	exurban	ducks	duck	duck	aquatic bird	bird	2	1	boy	sixth	0	0	0	0	1	0	no response
1	5	high	exurban	raccoons	raccoon	raccoon	other carnivore	mammal	0	1	boy	sixth	0	0	0	0	1	0	no response
1	5	high	exurban	cat	cat	cat	cat	mammal	3	0	boy	sixth	0	0	1	0	0	0	no response
1	5	high	exurban	dog	dog	dog	dog	mammal	3	0	boy	sixth	0	0	1	0	0	0	no response
1	5	high	exurban	fish	fish	fish	fish	fish	3	0	boy	sixth	0	0	1	0	0	0	no response
1	5	high	exurban	panda	panda	panda	bear	mammal	1	0	boy	sixth	0	0	1	0	0	0	no response
1	5	high	exurban	horses	horse	horse	domestic ungulate	mammal	3	0	girl	sixth	0	0	0	0	1	0	no response
1	5	high	exurban	monkeys	monkey	monkey	primate	mammal	1	0	girl	sixth	0	0	0	0	1	0	no response
1	5	high	exurban	owls	owl	owl	raptor or owl	bird	2	1	girl	sixth	0	0	0	0	1	0	no response
1	5	high	exurban	zebras	zebra	zebra	ungulate	mammal	1	0	girl	sixth	0	0	0	0	1	0	no response
1	5	high	exurban	monkey	monkey	monkey	primate	mammal	1	0	boy	sixth	0	0	0	0	1	0	no response
1	5	high	exurban	panda	panda	panda	bear	mammal	1	0	boy	sixth	0	0	0	0	1	0	no response
1	5	high	exurban	bunny	rabbit	rabbit	rabbit	mammal	3	0	boy	sixth	0	0	0	0	1	0	no response
1	5	high	exurban	snake	snake	snake	snake	reptile	3	0	boy	sixth	0	0	0	0	1	0	no response
1	5	high	exurban	dogs	dog	dog	dog	mammal	3	0	girl	sixth	0	0	1	0	0	0	no response
1	5	high	exurban	kangaroo	kangaroo	kangaroo	marsupial	mammal	1	0	girl	sixth	0	0	1	0	0	0	no response
1	5	high	exurban	monkey	monkey	monkey	primate	mammal	1	0	girl	sixth	0	0	1	0	0	0	no response
1	5	high	exurban	rabbit	rabbit	rabbit	rabbit	mammal	3	0	girl	sixth	0	0	1	0	0	0	no response
1	5	high	exurban	cats	cat	cat	cat	mammal	3	0	boy	sixth	0	0	0	1	1	0	no response
1	5	high	exurban	panda	panda	panda	bear	mammal	1	0	boy	sixth	0	0	0	1	1	0	no response
1	5	high	exurban	penguins	penguin	penguin	aquatic bird	bird	1	0	boy	sixth	0	0	0	1	1	0	no response
1	5	high	exurban	polar bears	polar bear	polar bear	bear	mammal	1	0	boy	sixth	0	0	0	1	1	0	no response
1	5	high	exurban	monkey	monkey	monkey	primate	mammal	1	0	girl	sixth	0	0	0	0	1	0	no response
1	5	high	exurban	owl	owl	owl	raptor or owl	bird	2	1	girl	sixth	0	0	0	0	1	0	no response
1	5	high	exurban	panda	panda	panda	bear	mammal	1	0	girl	sixth	0	0	0	0	1	0	no response
1	5	high	exurban	zebra	zebra	zebra	ungulate	mammal	1	0	girl	sixth	0	0	0	0	1	0	no response
1	5	high	exurban	cat	cat	cat	cat	mammal	3	0	boy	sixth	0	0	1	0	0	0	no response
1	5	high	exurban	dogs	dog	dog	dog	mammal	3	0	boy	sixth	0	0	1	0	0	0	no response
1	5	high	exurban	elephants	elephant	elephant	African megafauna	mammal	1	0	boy	sixth	0	0	1	0	0	0	no response
1	5	high	exurban	bugs	insect	insect	insect	terrestrial invertebrate	2	1	boy	sixth	0	0	1	0	0	0	no response
1	5	high	exurban	lion	lion	lion	big cat	mammal	1	0	girl	sixth	0	0	0	0	1	0	no response
1	5	high	exurban	monkey	monkey	monkey	primate	mammal	1	0	girl	sixth	0	0	0	0	1	0	no response
1	5	high	exurban	tiger	tiger	tiger	big cat	mammal	1	0	girl	sixth	0	0	0	0	1	0	no response
1	5	high	exurban	zebra	zebra	zebra	ungulate	mammal	1	0	girl	sixth	0	0	0	0	1	0	no response
1	5	high	exurban	chickens	chicken	chicken	ground bird	bird	3	0	boy	sixth	0	0	0	0	1	0	no response
1	5	high	exurban	cows	cow	cow	domestic ungulate	mammal	3	0	boy	sixth	0	0	0	0	1	0	no response
1	5	high	exurban	horses	horse	horse	domestic ungulate	mammal	3	0	boy	sixth	0	0	0	0	1	0	no response
1	5	high	exurban	pandas	panda	panda	bear	mammal	1	0	boy	sixth	0	0	0	0	1	0	no response
1	5	high	exurban	dogs	dog	dog	dog	mammal	3	0	girl	sixth	0	1	0	0	0	0	no response
1	5	high	exurban	lions	lion	lion	big cat	mammal	1	0	girl	sixth	0	1	0	0	0	0	no response
1	5	high	exurban	polar bears	polar bear	polar bear	bear	mammal	1	0	girl	sixth	0	1	0	0	0	0	no response
1	5	high	exurban	zebra	zebra	zebra	ungulate	mammal	1	0	girl	sixth	0	1	0	0	0	0	no response
1	5	high	exurban	cat	cat	cat	cat	mammal	3	0	boy	sixth	0	0	0	0	1	0	no response
1	5	high	exurban	dog	dog	dog	dog	mammal	3	0	boy	sixth	0	0	0	0	1	0	no response
1	5	high	exurban	gerble	gerbil	gerbil	small mammal	mammal	3	0	boy	sixth	0	0	0	0	1	0	no response
1	5	high	exurban	snake	snake	snake	snake	reptile	3	0	boy	sixth	0	0	0	0	1	0	no response
1	5	high	exurban	elephants	elephant	elephant	African megafauna	mammal	1	0	girl	sixth	0	0	0	0	1	0	no response
1	5	high	exurban	kangaroo	kangaroo	kangaroo	marsupial	mammal	1	0	girl	sixth	0	0	0	0	1	0	no response
1	5	high	exurban	panda	panda	panda	bear	mammal	1	0	girl	sixth	0	0	0	0	1	0	no response
1	5	high	exurban	zebras	zebra	zebra	ungulate	mammal	1	0	girl	sixth	0	0	0	0	1	0	no response
1	5	high	exurban	bird	bird	bird	bird	bird	3	0	boy	sixth	0	0	0	0	1	0	no response
1	5	high	exurban	cat	cat	cat	cat	mammal	3	0	boy	sixth	0	0	0	0	1	0	no response
1	5	high	exurban	dog	dog	dog	dog	mammal	3	0	boy	sixth	0	0	0	0	1	0	no response
1	5	high	exurban	bunny	rabbit	rabbit	rabbit	mammal	3	0	boy	sixth	0	0	0	0	1	0	no response
1	5	high	exurban	coyote	coyote	coyote	canid	mammal	0	1	boy	sixth	0	1	0	1	1	0	no response
1	5	high	exurban	kangaroo	kangaroo	kangaroo	marsupial	mammal	1	0	boy	sixth	0	1	0	1	1	0	no response
1	5	high	exurban	lion	lion	lion	big cat	mammal	1	0	boy	sixth	0	1	0	1	1	0	no response
1	5	high	exurban	wolf	wolf	wolf	canid	mammal	1	0	boy	sixth	0	1	0	1	1	0	no response
1	5	high	exurban	frog	frog	frog	amphibian	amphibian	2	0	girl	sixth	0	0	0	0	1	0	no response
1	5	high	exurban	lizards	lizard	lizard	lizard	reptile	3	0	girl	sixth	0	0	0	0	1	0	no response
1	5	high	exurban	snake	snake	snake	snake	reptile	3	0	girl	sixth	0	0	0	0	1	0	no response
1	5	high	exurban	wolf	wolf	wolf	canid	mammal	1	0	girl	sixth	0	0	0	0	1	0	no response
1	5	high	exurban	albino crocodile	albino crocodile	crocodile	alligator or crocodile	reptile	1	0	boy	sixth	0	0	0	0	1	0	no response
1	5	high	exurban	long snout crocodile	long snout crocodile	long snout crocodile	alligator or crocodile	reptile	1	0	boy	sixth	0	0	0	0	1	0	no response
1	5	high	exurban	albino tiger	albino tiger	tiger	big cat	mammal	1	0	boy	sixth	0	0	0	0	1	0	no response
1	5	high	exurban	tiger	tiger	tiger	big cat	mammal	1	0	boy	sixth	0	0	0	0	1	0	no response
1	5	high	exurban	cats	cat	cat	cat	mammal	3	0	girl	sixth	0	0	0	0	1	0	no response
1	5	high	exurban	dogs	dog	dog	dog	mammal	3	0	girl	sixth	0	0	0	0	1	0	no response
1	5	high	exurban	monkeys	monkey	monkey	primate	mammal	1	0	girl	sixth	0	0	0	0	1	0	no response
1	5	high	exurban	panda	panda	panda	bear	mammal	1	0	girl	sixth	0	0	0	0	1	0	no response
1	5	high	exurban	dogs	dog	dog	dog	mammal	3	0	girl	sixth	0	1	0	0	0	1	no response
1	5	high	exurban	dolphins	dolphin	dolphin	marine mammal	mammal	1	0	girl	sixth	0	1	0	0	0	1	no response
1	5	high	exurban	koala	koala	koala	marsupial	mammal	1	0	girl	sixth	0	1	0	0	0	1	no response
1	5	high	exurban	sting rays	stingray	stingray	shark	fish	1	0	girl	sixth	0	1	0	0	0	1	no response
1	5	high	exurban	bear	bear	bear	bear	mammal	2	1	boy	eigth	0	0	1	0	0	0	no response
1	5	high	exurban	lion	lion	lion	big cat	mammal	1	0	boy	eigth	0	0	1	0	0	0	no response
1	5	high	exurban	panda	panda	panda	bear	mammal	1	0	boy	eigth	0	0	1	0	0	0	no response
1	5	high	exurban	wolf	wolf	wolf	canid	mammal	1	0	boy	eigth	0	0	1	0	0	0	no response
1	5	high	exurban	dogs	dog	dog	dog	mammal	3	0	girl	sixth	0	0	1	0	0	0	no response
1	5	high	exurban	horse	horse	horse	domestic ungulate	mammal	3	0	girl	sixth	0	0	1	0	0	0	no response
1	5	high	exurban	panda	panda	panda	bear	mammal	1	0	girl	sixth	0	0	1	0	0	0	no response
1	5	high	exurban	wolves	wolf	wolf	canid	mammal	1	0	girl	sixth	0	0	1	0	0	0	no response
1	5	high	exurban	dolphin	dolphin	dolphin	marine mammal	mammal	1	0	girl	sixth	0	0	0	0	1	0	no response
1	5	high	exurban	panda	panda	panda	bear	mammal	1	0	girl	sixth	0	0	0	0	1	0	no response
1	5	high	exurban	snakes	snake	snake	snake	reptile	3	0	girl	sixth	0	0	0	0	1	0	no response
1	5	high	exurban	wolf	wolf	wolf	canid	mammal	1	0	girl	sixth	0	0	0	0	1	0	no response
1	5	high	exurban	elephant	elephant	elephant	African megafauna	mammal	1	0	girl	sixth	0	0	0	0	1	0	no response
1	5	high	exurban	monkey	monkey	monkey	primate	mammal	1	0	girl	sixth	0	0	0	0	1	0	no response
1	5	high	exurban	panda	panda	panda	bear	mammal	1	0	girl	sixth	0	0	0	0	1	0	no response
1	5	high	exurban	zebra	zebra	zebra	ungulate	mammal	1	0	girl	sixth	0	0	0	0	1	0	no response
1	5	high	exurban	goat	goat	goat	domestic ungulate	mammal	3	0	boy	sixth	0	1	0	0	0	0	no response
1	5	high	exurban	sheep	sheep	sheep	domestic ungulate	mammal	3	0	boy	sixth	0	1	0	0	0	0	no response
1	5	high	exurban	whale	whale	whale	marine mammal	mammal	1	0	boy	sixth	0	1	0	0	0	0	no response
1	5	high	exurban	wolf	wolf	wolf	canid	mammal	1	0	boy	sixth	0	1	0	0	0	0	no response
1	5	high	exurban	deer	deer	deer	ungulate	mammal	2	1	girl	sixth	0	0	0	0	1	0	no response
1	5	high	exurban	koala	koala	koala	marsupial	mammal	1	0	girl	sixth	0	0	0	0	1	0	no response
1	5	high	exurban	owl	owl	owl	raptor or owl	bird	2	1	girl	sixth	0	0	0	0	1	0	no response
1	5	high	exurban	zebra	zebra	zebra	ungulate	mammal	1	0	girl	sixth	0	0	0	0	1	0	no response
1	5	high	exurban	dogs	dog	dog	dog	mammal	3	0	girl	sixth	0	0	0	0	1	0	no response
1	5	high	exurban	panda	panda	panda	bear	mammal	1	0	girl	sixth	0	0	0	0	1	0	no response
1	5	high	exurban	rabbit	rabbit	rabbit	rabbit	mammal	3	0	girl	sixth	0	0	0	0	1	0	no response
1	5	high	exurban	zebra	zebra	zebra	ungulate	mammal	1	0	girl	sixth	0	0	0	0	1	0	no response
1	5	high	exurban	bat	bat	bat	bat	mammal	2	1	boy	sixth	0	0	0	1	1	1	no response
1	5	high	exurban	deer	deer	deer	ungulate	mammal	2	1	boy	sixth	0	0	0	1	1	1	no response
1	5	high	exurban	rabbit	rabbit	rabbit	rabbit	mammal	3	0	boy	sixth	0	0	0	1	1	1	no response
1	5	high	exurban	wolf	wolf	wolf	canid	mammal	1	0	boy	sixth	0	0	0	1	1	1	no response
1	5	high	exurban	bear	bear	bear	bear	mammal	2	1	boy	sixth	0	0	1	0	0	0	no response
1	5	high	exurban	lion	lion	lion	big cat	mammal	1	0	boy	sixth	0	0	1	0	0	0	no response
1	5	high	exurban	[anda	panda	panda	bear	mammal	1	0	boy	sixth	0	0	1	0	0	0	no response
1	5	high	exurban	wolf	wolf	wolf	canid	mammal	1	0	boy	sixth	0	0	1	0	0	0	no response
1	5	high	exurban	dogs	dog	dog	dog	mammal	3	0	boy	sixth	0	0	1	0	0	0	no response
1	5	high	exurban	donkeys	donkey	donkey	domestic ungulate	mammal	3	0	boy	sixth	0	0	1	0	0	0	no response
1	5	high	exurban	bunnies	rabbit	rabbit	rabbit	mammal	3	0	boy	sixth	0	0	1	0	0	0	no response
1	5	high	exurban	sharks	shark	shark	shark	fish	1	0	boy	sixth	0	0	1	0	0	0	no response
1	5	high	exurban	dog	dog	dog	dog	mammal	3	0	boy	sixth	0	0	0	0	1	1	no response
1	5	high	exurban	elephant	elephant	elephant	African megafauna	mammal	1	0	boy	sixth	0	0	0	0	1	1	no response
1	5	high	exurban	panda	panda	panda	bear	mammal	1	0	boy	sixth	0	0	0	0	1	1	no response
1	5	high	exurban	rabbit	rabbit	rabbit	rabbit	mammal	3	0	boy	sixth	0	0	0	0	1	1	no response
1	5	high	exurban	dolphins	dolphin	dolphin	marine mammal	mammal	1	0	girl	sixth	0	0	0	0	1	0	no response
1	5	high	exurban	horse	horse	horse	domestic ungulate	mammal	3	0	girl	sixth	0	0	0	0	1	0	no response
1	5	high	exurban	rabbits	rabbit	rabbit	rabbit	mammal	3	0	girl	sixth	0	0	0	0	1	0	no response
1	5	high	exurban	snakes	snake	snake	snake	reptile	3	0	girl	sixth	0	0	0	0	1	0	no response
1	5	high	exurban	cheetah	cheetah	cheetah	felid	mammal	1	0	girl	sixth	0	0	1	0	0	0	no response
1	5	high	exurban	dogs	dog	dog	dog	mammal	3	0	girl	sixth	0	0	1	0	0	0	no response
1	5	high	exurban	giraffe	giraffe	giraffe	African megafauna	mammal	1	0	girl	sixth	0	0	1	0	0	0	no response
1	5	high	exurban	horses	horse	horse	domestic ungulate	mammal	3	0	girl	sixth	0	0	1	0	0	0	no response
1	5	high	exurban	cat	cat	cat	cat	mammal	3	0	boy	sixth	0	0	0	0	1	0	no response
1	5	high	exurban	dog	dog	dog	dog	mammal	3	0	boy	sixth	0	0	0	0	1	0	no response
1	5	high	exurban	fish	fish	fish	fish	fish	3	0	boy	sixth	0	0	0	0	1	0	no response
1	5	high	exurban	whale	whale	whale	marine mammal	mammal	1	0	boy	sixth	0	0	0	0	1	0	no response
1	5	high	exurban	lion	lion	lion	big cat	mammal	1	0	boy	sixth	0	0	1	0	0	0	no response
1	5	high	exurban	shark	shark	shark	shark	fish	1	0	boy	sixth	0	0	1	0	0	0	no response
1	5	high	exurban	tiger	tiger	tiger	big cat	mammal	1	0	boy	sixth	0	0	1	0	0	0	no response
1	5	high	exurban	wolf	wolf	wolf	canid	mammal	1	0	boy	sixth	0	0	1	0	0	0	no response
1	5	high	exurban	coyote	coyote	coyote	canid	mammal	0	1	girl	sixth	0	0	1	0	0	0	no response
1	5	high	exurban	fox	fox	fox	canid	mammal	2	1	girl	sixth	0	0	1	0	0	0	no response
1	5	high	exurban	monkey	monkey	monkey	primate	mammal	1	0	girl	sixth	0	0	1	0	0	0	no response
1	5	high	exurban	wolf	wolf	wolf	canid	mammal	1	0	girl	sixth	0	0	1	0	0	0	no response
1	5	high	exurban	kangaroo	kangaroo	kangaroo	marsupial	mammal	1	0	girl	sixth	0	1	0	0	0	0	no response
1	5	high	exurban	monkey	monkey	monkey	primate	mammal	1	0	girl	sixth	0	1	0	0	0	0	no response
1	5	high	exurban	panda	panda	panda	bear	mammal	1	0	girl	sixth	0	1	0	0	0	0	no response
1	5	high	exurban	zebra	zebra	zebra	ungulate	mammal	1	0	girl	sixth	0	1	0	0	0	0	no response
1	5	high	exurban	antelope	antelope	antelope	ungulate	mammal	1	0	boy	sixth	0	0	0	0	1	0	no response
1	5	high	exurban	deer	deer	deer	ungulate	mammal	2	1	boy	sixth	0	0	0	0	1	0	no response
1	5	high	exurban	gazelle	gazelle	gazelle	ungulate	mammal	1	0	boy	sixth	0	0	0	0	1	0	no response
1	5	high	exurban	monkey	monkey	monkey	primate	mammal	1	0	boy	sixth	0	0	0	0	1	0	no response
1	5	high	exurban	ducks	duck	duck	aquatic bird	bird	2	1	girl	sixth	0	0	0	0	1	0	no response
1	5	high	exurban	frogs	frog	frog	amphibian	amphibian	2	0	girl	sixth	0	0	0	0	1	0	no response
1	5	high	exurban	monkeys	monkey	monkey	primate	mammal	1	0	girl	sixth	0	0	0	0	1	0	no response
1	5	high	exurban	wolves	wolf	wolf	canid	mammal	1	0	girl	sixth	0	0	0	0	1	0	no response
1	5	high	exurban	bear	bear	bear	bear	mammal	2	1	boy	sixth	0	0	0	1	1	0	no response
1	5	high	exurban	coyote	coyote	coyote	canid	mammal	0	1	boy	sixth	0	0	0	1	1	0	no response
1	5	high	exurban	fox	fox	fox	canid	mammal	2	1	boy	sixth	0	0	0	1	1	0	no response
1	5	high	exurban	wolf	wolf	wolf	canid	mammal	1	0	boy	sixth	0	0	0	1	1	0	no response
1	5	high	exurban	cougars	cougar	cougar	big cat	mammal	1	0	girl	sixth	0	0	0	0	1	0	no response
1	5	high	exurban	dog	dog	dog	dog	mammal	3	0	girl	sixth	0	0	0	0	1	0	no response
1	5	high	exurban	rabbit	rabbit	rabbit	rabbit	mammal	3	0	girl	sixth	0	0	0	0	1	0	no response
1	5	high	exurban	zebra	zebra	zebra	ungulate	mammal	1	0	girl	sixth	0	0	0	0	1	0	no response
1	5	high	exurban	coyote	coyote	coyote	canid	mammal	0	1	boy	sixth	0	0	0	0	1	0	no response
1	5	high	exurban	great danes	great dane	dog	dog	mammal	3	0	boy	sixth	0	0	0	0	1	0	no response
1	5	high	exurban	yellow labs	yellow lab	dog	dog	mammal	3	0	boy	sixth	0	0	0	0	1	0	no response
1	5	high	exurban	wolf	wolf	wolf	canid	mammal	1	0	boy	sixth	0	0	0	0	1	0	no response
1	5	high	exurban	deers	deer	deer	ungulate	mammal	2	1	boy	sixth	0	0	1	0	0	0	no response
1	5	high	exurban	tigers	tiger	tiger	big cat	mammal	1	0	boy	sixth	0	0	1	0	0	0	no response
1	5	high	exurban	wolf	wolf	wolf	canid	mammal	1	0	boy	sixth	0	0	1	0	0	0	no response
1	5	high	exurban	zebra	zebra	zebra	ungulate	mammal	1	0	boy	sixth	0	0	1	0	0	0	no response
1	5	high	exurban	giraffe	giraffe	giraffe	African megafauna	mammal	1	0	boy	sixth	0	0	0	0	1	0	no response
1	5	high	exurban	hyena	hyena	hyena	other carnivore	mammal	1	0	boy	sixth	0	0	0	0	1	0	no response
1	5	high	exurban	lion	lion	lion	big cat	mammal	1	0	boy	sixth	0	0	0	0	1	0	no response
1	5	high	exurban	panda	panda	panda	bear	mammal	1	0	boy	sixth	0	0	0	0	1	0	no response
1	5	high	exurban	panda	panda	panda	bear	mammal	1	0	boy	sixth	0	0	1	0	0	0	no response
1	5	high	exurban	rhinocerous	rhinoceros	rhinoceros	African megafauna	mammal	1	0	boy	sixth	0	0	1	0	0	0	no response
1	5	high	exurban	whale	whale	whale	marine mammal	mammal	1	0	boy	sixth	0	0	1	0	0	0	no response
1	5	high	exurban	wolf	wolf	wolf	canid	mammal	1	0	boy	sixth	0	0	1	0	0	0	no response
1	5	high	exurban	dolphin	dolphin	dolphin	marine mammal	mammal	1	0	girl	sixth	0	0	1	0	0	0	no response
1	5	high	exurban	monkey	monkey	monkey	primate	mammal	1	0	girl	sixth	0	0	1	0	0	0	no response
1	5	high	exurban	panda	panda	panda	bear	mammal	1	0	girl	sixth	0	0	1	0	0	0	no response
1	5	high	exurban	zebra	zebra	zebra	ungulate	mammal	1	0	girl	sixth	0	0	1	0	0	0	no response
1	5	high	exurban	cheetah	cheetah	cheetah	felid	mammal	1	0	boy	sixth	0	0	0	0	1	0	no response
1	5	high	exurban	lion	lion	lion	big cat	mammal	1	0	boy	sixth	0	0	0	0	1	0	no response
1	5	high	exurban	monkey	monkey	monkey	primate	mammal	1	0	boy	sixth	0	0	0	0	1	0	no response
1	5	high	exurban	wolf	wolf	wolf	canid	mammal	1	0	boy	sixth	0	0	0	0	1	0	no response
1	5	high	exurban	blue whale	blue whale	blue whale	marine mammal	mammal	1	0	girl	sixth	0	0	1	0	0	0	no response
1	5	high	exurban	cheetah	cheetah	cheetah	felid	mammal	1	0	girl	sixth	0	0	1	0	0	0	no response
1	5	high	exurban	lion	lion	lion	big cat	mammal	1	0	girl	sixth	0	0	1	0	0	0	no response
1	5	high	exurban	wolf	wolf	wolf	canid	mammal	1	0	girl	sixth	0	0	1	0	0	0	no response
1	5	high	exurban	penguin	penguin	penguin	aquatic bird	bird	1	0	boy	sixth	0	0	0	0	1	0	no response
1	5	high	exurban	bobcat	bobcat	bobcat	felid	mammal	0	1	girl	sixth	0	0	0	0	1	0	no response
1	5	high	exurban	snow leopard	snow leopard	snow leopard	big cat	mammal	1	0	girl	sixth	0	0	0	0	1	0	no response
1	5	high	exurban	tiger	tiger	tiger	big cat	mammal	1	0	girl	sixth	0	0	0	0	1	0	no response
1	5	high	exurban	coyotes	coyote	coyote	canid	mammal	0	1	boy	sixth	0	1	0	0	0	0	no response
1	5	high	exurban	foxes	fox	fox	canid	mammal	2	1	boy	sixth	0	1	0	0	0	0	no response
1	5	high	exurban	lions	lion	lion	big cat	mammal	1	0	boy	sixth	0	1	0	0	0	0	no response
1	5	high	exurban	wolves	wolf	wolf	canid	mammal	1	0	boy	sixth	0	1	0	0	0	0	no response
2	5	high	exurban	cat	cat	cat	cat	mammal	3	0	boy	sixth	0	0	0	1	0	0	no
2	5	high	exurban	dog	dog	dog	dog	mammal	3	0	boy	sixth	0	0	0	1	0	0	no
2	5	high	exurban	hamster	hamster	hamster	small mammal	mammal	3	0	boy	sixth	0	0	0	1	0	0	no
2	5	high	exurban	cats	cat	cat	cat	mammal	3	0	girl	sixth	0	0	0	0	1	0	no
2	5	high	exurban	dogs	dog	dog	dog	mammal	3	0	girl	sixth	0	0	0	0	1	0	no
2	5	high	exurban	handster / rabit	hamster	hamster	small mammal	mammal	3	0	girl	sixth	0	0	0	0	1	0	no
2	5	high	exurban	hourse	horse	horse	domestic ungulate	mammal	3	0	girl	sixth	0	0	0	0	1	0	no
2	5	high	exurban	cheeta	cheetah	cheetah	felid	mammal	1	0	boy	sixth	0	0	1	0	0	0	no
2	5	high	exurban	dog	dog	dog	dog	mammal	3	0	boy	sixth	0	0	1	0	0	0	no
2	5	high	exurban	monkey	monkey	monkey	primate	mammal	1	0	boy	sixth	0	0	1	0	0	0	no
2	5	high	exurban	wolf	wolf	wolf	canid	mammal	1	0	boy	sixth	0	0	1	0	0	0	no
2	5	high	exurban	deers	deer	deer	ungulate	mammal	2	1	boy	sixth	0	0	0	0	1	0	yes
2	5	high	exurban	dogs	dog	dog	dog	mammal	3	0	boy	sixth	0	0	0	0	1	0	yes
2	5	high	exurban	monkey	monkey	monkey	primate	mammal	1	0	boy	sixth	0	0	0	0	1	0	yes
2	5	high	exurban	turkey	turkey	turkey	ground bird	bird	3	1	boy	sixth	0	0	0	0	1	0	yes
2	5	high	exurban	dog	dog	dog	dog	mammal	3	0	boy	sixth	0	0	1	0	0	0	no
2	5	high	exurban	fish	fish	fish	fish	fish	3	0	boy	sixth	0	0	1	0	0	0	no
2	5	high	exurban	monekey	monkey	monkey	primate	mammal	1	0	boy	sixth	0	0	1	0	0	0	no
2	5	high	exurban	rinowe	rhinoceros	rhinoceros	African megafauna	mammal	1	0	boy	sixth	0	0	1	0	0	0	no
2	5	high	exurban	dogs	dog	dog	dog	mammal	3	0	girl	sixth	0	0	0	0	1	0	yes
2	5	high	exurban	Fox	fox	fox	canid	mammal	2	1	girl	sixth	0	0	0	0	1	0	yes
2	5	high	exurban	ghoats	goat	goat	domestic ungulate	mammal	3	0	girl	sixth	0	0	0	0	1	0	yes
2	5	high	exurban	horse	horse	horse	domestic ungulate	mammal	3	0	girl	sixth	0	0	0	0	1	0	yes
2	5	high	exurban	brids	bird	bird	bird	bird	3	0	girl	sixth	0	0	1	0	0	0	yes
2	5	high	exurban	dogs	dog	dog	dog	mammal	3	0	girl	sixth	0	0	1	0	0	0	yes
2	5	high	exurban	dogs	dog	dog	dog	mammal	3	0	girl	sixth	0	0	1	0	0	0	no
2	5	high	exurban	puppys	baby dog	dog	dog	mammal	3	0	girl	sixth	0	0	1	0	0	0	no
2	5	high	exurban	dolphins	dolphin	dolphin	marine mammal	mammal	1	0	girl	sixth	0	0	1	0	0	0	no
2	5	high	exurban	bunny's	rabbit	rabbit	rabbit	mammal	3	0	girl	sixth	0	0	1	0	0	0	no
2	5	high	exurban	anteaters	anteater	anteater	anteater, sloth, armadillo	mammal	1	0	boy	sixth	0	0	0	0	1	0	no
2	5	high	exurban	fox	fox	fox	canid	mammal	2	1	boy	sixth	0	0	0	0	1	0	no
2	5	high	exurban	lemurs	lemur	lemur	primate	mammal	1	0	boy	sixth	0	0	0	0	1	0	no
2	5	high	exurban	possums	opossum	opossum	marsupial	mammal	0	1	boy	sixth	0	0	0	0	1	0	no
2	5	high	exurban	froge	frog	frog	amphibian	amphibian	2	0	boy	sixth	0	0	0	1	1	0	yes
2	5	high	exurban	shark	shark	shark	shark	fish	1	0	boy	sixth	0	0	0	1	1	0	yes
2	5	high	exurban	snake	snake	snake	snake	reptile	3	0	boy	sixth	0	0	0	1	1	0	yes
2	5	high	exurban	cats	cat	cat	cat	mammal	3	0	boy	sixth	0	0	1	0	0	0	no
2	5	high	exurban	dogs	dog	dog	dog	mammal	3	0	boy	sixth	0	0	1	0	0	0	no
2	5	high	exurban	rabbit	rabbit	rabbit	rabbit	mammal	3	0	boy	sixth	0	0	1	0	0	0	no
2	5	high	exurban	Dog	dog	dog	dog	mammal	3	0	boy	sixth	0	0	0	0	0	1	yes
2	5	high	exurban	lion	lion	lion	big cat	mammal	1	0	boy	sixth	0	0	0	0	0	1	yes
2	5	high	exurban	tiger	tiger	tiger	big cat	mammal	1	0	boy	sixth	0	0	0	0	0	1	yes
2	5	high	exurban	wolf	wolf	wolf	canid	mammal	1	0	boy	sixth	0	0	0	0	0	1	yes
2	5	high	exurban	brid	bird	bird	bird	bird	3	0	boy	sixth	0	1	0	0	0	0	no
2	5	high	exurban	cat	cat	cat	cat	mammal	3	0	boy	sixth	0	1	0	0	0	0	no
2	5	high	exurban	crabs	crab	crab	marine invertebrate	marine invertebrate	2	1	boy	sixth	0	1	0	0	0	0	no
2	5	high	exurban	dog	dog	dog	dog	mammal	3	0	boy	sixth	0	1	0	0	0	0	no
2	5	high	exurban	deer	deer	deer	ungulate	mammal	2	1	boy	sixth	0	0	0	0	1	0	yes
2	5	high	exurban	duck	duck	duck	aquatic bird	bird	2	1	boy	sixth	0	0	0	0	1	0	yes
2	5	high	exurban	hog	pig	pig	domestic ungulate	mammal	3	0	boy	sixth	0	0	0	0	1	0	yes
2	5	high	exurban	turky	turkey	turkey	ground bird	bird	3	0	boy	sixth	0	0	0	0	1	0	yes
2	5	high	exurban	dog	dog	dog	dog	mammal	3	0	boy	sixth	0	0	0	0	1	0	no
2	5	high	exurban	lion	lion	lion	big cat	mammal	1	0	boy	sixth	0	0	0	0	1	0	no
2	5	high	exurban	snake	snake	snake	snake	reptile	3	0	boy	sixth	0	0	0	0	1	0	no
2	5	high	exurban	spider	spider	spider	arachnid	terrestrial invertebrate	2	0	boy	sixth	0	0	0	0	1	0	no
2	5	high	exurban	the baldegal	bald eagle	bald eagle	raptor or owl	bird	0	1	boy	sixth	0	0	0	0	1	0	no
2	5	high	exurban	lions	lion	lion	big cat	mammal	1	0	boy	sixth	0	0	0	0	1	0	no
2	5	high	exurban	seals	seal	seal	marine mammal	mammal	1	0	boy	sixth	0	0	0	0	1	0	no
2	5	high	exurban	flamingo	flamingo	flamingo	aquatic bird	bird	1	0	girl	sixth	0	0	0	0	1	0	no
2	5	high	exurban	girrafe	giraffe	giraffe	African megafauna	mammal	1	0	girl	sixth	0	0	0	0	1	0	no
2	5	high	exurban	horse	horse	horse	domestic ungulate	mammal	3	0	girl	sixth	0	0	0	0	1	0	no
2	5	high	exurban	turtle	turtle	turtle	turtle	reptile	3	0	girl	sixth	0	0	0	0	1	0	no
2	5	high	exurban	cat	cat	cat	cat	mammal	3	0	boy	sixth	0	0	0	0	1	0	no
2	5	high	exurban	dog	dog	dog	dog	mammal	3	0	boy	sixth	0	0	0	0	1	0	no
2	5	high	exurban	ocelot	ocelot	ocelot	felid	mammal	1	0	boy	sixth	0	0	0	0	1	0	no
2	5	high	exurban	panda bear	panda	panda	bear	mammal	1	0	boy	sixth	0	0	0	0	1	0	no
2	5	high	exurban	buterfly	butterfly	butterfly	butterfly	terrestrial invertebrate	2	1	girl	sixth	0	0	0	0	1	0	yes
2	5	high	exurban	cat	cat	cat	cat	mammal	3	0	girl	sixth	0	0	0	0	1	0	yes
2	5	high	exurban	dog	dog	dog	dog	mammal	3	0	girl	sixth	0	0	0	0	1	0	yes
2	5	high	exurban	panda	panda	panda	bear	mammal	1	0	girl	sixth	0	0	0	0	1	0	yes
2	5	high	exurban	bird	bird	bird	bird	bird	3	0	girl	sixth	0	0	1	0	0	0	no
2	5	high	exurban	butterfly	butterfly	butterfly	butterfly	terrestrial invertebrate	2	1	girl	sixth	0	0	1	0	0	0	no
2	5	high	exurban	girraffe	giraffe	giraffe	African megafauna	mammal	1	0	girl	sixth	0	0	1	0	0	0	no
2	5	high	exurban	rabbit	rabbit	rabbit	rabbit	mammal	3	0	girl	sixth	0	0	1	0	0	0	no
2	5	high	exurban	cats	cat	cat	cat	mammal	3	0	girl	sixth	0	1	0	0	1	0	no
2	5	high	exurban	dogs	dog	dog	dog	mammal	3	0	girl	sixth	0	1	0	0	1	0	no
2	5	high	exurban	zebras	zebra	zebra	ungulate	mammal	1	0	girl	sixth	0	1	0	0	1	0	no
2	5	high	exurban	zebras	zebra	zebra	ungulate	mammal	1	0	girl	sixth	0	1	0	0	1	0	no
2	5	high	exurban	Kittens	baby cat	cat	cat	mammal	3	0	girl	sixth	0	0	0	0	1	0	no response
2	5	high	exurban	Puppies	baby dog	dog	dog	mammal	3	0	girl	sixth	0	0	0	0	1	0	no response
2	5	high	exurban	Hamsters	hamster	hamster	small mammal	mammal	3	0	girl	sixth	0	0	0	0	1	0	no response
2	5	high	exurban	Bunnys	rabbit	rabbit	rabbit	mammal	3	0	girl	sixth	0	0	0	0	1	0	no response
2	5	high	exurban	kittens	baby cat	cat	cat	mammal	3	0	boy	sixth	0	0	0	0	1	0	no
2	5	high	exurban	dogs	dog	dog	dog	mammal	3	0	boy	sixth	0	0	0	0	1	0	no
2	5	high	exurban	owls	owl	owl	raptor or owl	bird	2	1	boy	sixth	0	0	0	0	1	0	no
2	5	high	exurban	turtles	turtle	turtle	turtle	reptile	3	0	boy	sixth	0	0	0	0	1	0	no
2	5	high	exurban	cats	cat	cat	cat	mammal	3	0	girl	sixth	0	0	0	0	1	0	no
2	5	high	exurban	dogs	dog	dog	dog	mammal	3	0	girl	sixth	0	0	0	0	1	0	no
2	5	high	exurban	ducks	duck	duck	aquatic bird	bird	2	1	girl	sixth	0	0	0	0	1	0	no
2	5	high	exurban	monckeys	monkey	monkey	primate	mammal	1	0	girl	sixth	0	0	0	0	1	0	no
2	5	high	exurban	butterflies	butterfly	butterfly	butterfly	terrestrial invertebrate	2	1	girl	sixth	0	0	0	0	1	0	yes
2	5	high	exurban	deer	deer	deer	ungulate	mammal	2	1	girl	sixth	0	0	0	0	1	0	yes
2	5	high	exurban	dogs	dog	dog	dog	mammal	3	0	girl	sixth	0	0	0	0	1	0	yes
2	5	high	exurban	zebras	zebra	zebra	ungulate	mammal	1	0	girl	sixth	0	0	0	0	1	0	yes
2	5	high	exurban	elephant	elephant	elephant	African megafauna	mammal	1	0	girl	sixth	0	0	0	0	1	0	yes
2	5	high	exurban	giraffs	giraffe	giraffe	African megafauna	mammal	1	0	girl	sixth	0	0	0	0	1	0	yes
2	5	high	exurban	horse	horse	horse	domestic ungulate	mammal	3	0	girl	sixth	0	0	0	0	1	0	yes
2	5	high	exurban	monkeys	monkey	monkey	primate	mammal	1	0	girl	sixth	0	0	0	0	1	0	yes
2	5	high	exurban	cats	cat	cat	cat	mammal	3	0	girl	sixth	0	0	0	0	0	1	yes
2	5	high	exurban	dogs	dog	dog	dog	mammal	3	0	girl	sixth	0	0	0	0	0	1	yes
2	5	high	exurban	leamer	lemur	lemur	primate	mammal	1	0	girl	sixth	0	0	0	0	0	1	yes
2	5	high	exurban	monkeys	monkey	monkey	primate	mammal	1	0	girl	sixth	0	0	0	0	0	1	yes
2	5	high	exurban	dolphins	dolphin	dolphin	marine mammal	mammal	1	0	girl	sixth	0	0	1	0	0	0	no
2	5	high	exurban	elephants	elephant	elephant	African megafauna	mammal	1	0	girl	sixth	0	0	1	0	0	0	no
2	5	high	exurban	hourses	horse	horse	domestic ungulate	mammal	3	0	girl	sixth	0	0	1	0	0	0	no
2	5	high	exurban	pandas	panda	panda	bear	mammal	1	0	girl	sixth	0	0	1	0	0	0	no
2	5	high	exurban	chickens	chicken	chicken	ground bird	bird	3	0	boy	sixth	0	0	0	0	1	0	no
2	5	high	exurban	puppys	baby dog	dog	dog	mammal	3	0	boy	sixth	0	0	0	0	1	0	no
2	5	high	exurban	ducks	duck	duck	aquatic bird	bird	2	1	boy	sixth	0	0	0	0	1	0	no
2	5	high	exurban	goats	goat	goat	domestic ungulate	mammal	3	0	boy	sixth	0	0	0	0	1	0	no
2	5	high	exurban	dogs	dog	dog	dog	mammal	3	0	girl	sixth	0	0	0	1	1	0	no
2	5	high	exurban	dolfins	dolphin	dolphin	marine mammal	mammal	1	0	girl	sixth	0	0	0	1	1	0	no
2	5	high	exurban	monky	monkey	monkey	primate	mammal	1	0	girl	sixth	0	0	0	1	1	0	no
2	5	high	exurban	sharkes	shark	shark	shark	fish	1	0	girl	sixth	0	0	0	1	1	0	no
2	5	high	exurban	cat	cat	cat	cat	mammal	3	0	boy	sixth	0	0	0	0	1	0	no
2	5	high	exurban	dog	dog	dog	dog	mammal	3	0	boy	sixth	0	0	0	0	1	0	no
2	5	high	exurban	ginni pig	guinea pig	guinea pig	small mammal	mammal	3	0	boy	sixth	0	0	0	0	1	0	no
2	5	high	exurban	horse	horse	horse	domestic ungulate	mammal	3	0	boy	sixth	0	0	0	0	1	0	no
2	5	high	exurban	birds	bird	bird	bird	bird	3	0	boy	sixth	0	0	1	0	0	0	no
2	5	high	exurban	cats	cat	cat	cat	mammal	3	0	boy	sixth	0	0	1	0	0	0	no
2	5	high	exurban	dogs	dog	dog	dog	mammal	3	0	boy	sixth	0	0	1	0	0	0	no
2	5	high	exurban	fish	fish	fish	fish	fish	3	0	boy	sixth	0	0	1	0	0	0	no
2	5	high	exurban	bugs riches bedols mices	bug	bug	insect	terrestrial invertebrate	2	1	boy	sixth	1	1	0	0	1	0	no
2	5	high	exurban	deer coyote zebralion	deer	deer	ungulate	mammal	2	1	boy	sixth	1	1	0	0	1	0	no
2	5	high	exurban	gratwhitshorkmonkybera	great white shark	great white shark	shark	fish	1	0	boy	sixth	1	1	0	0	1	0	no
2	5	high	exurban	dogs	dog	dog	dog	mammal	3	0	girl	sixth	0	0	0	0	1	0	no
2	5	high	exurban	kowala	koala	koala	marsupial	mammal	1	0	girl	sixth	0	0	0	0	1	0	no
2	5	high	exurban	monkeys	monkey	monkey	primate	mammal	1	0	girl	sixth	0	0	0	0	1	0	no
2	5	high	exurban	panda	panda	panda	bear	mammal	1	0	girl	sixth	0	0	0	0	1	0	no
2	5	high	exurban	cats	cat	cat	cat	mammal	3	0	girl	sixth	0	0	1	0	0	0	no
2	5	high	exurban	checken	chicken	chicken	ground bird	bird	3	0	girl	sixth	0	0	1	0	0	0	no
2	5	high	exurban	puypy	baby dog	dog	dog	mammal	3	0	girl	sixth	0	0	1	0	0	0	no
2	5	high	exurban	pigs	pig	pig	domestic ungulate	mammal	3	0	girl	sixth	0	0	1	0	0	0	no
2	5	high	exurban	bird	bird	bird	bird	bird	3	0	boy	sixth	0	0	1	0	0	0	no
2	5	high	exurban	cat	cat	cat	cat	mammal	3	0	boy	sixth	0	0	1	0	0	0	no
2	5	high	exurban	dog	dog	dog	dog	mammal	3	0	boy	sixth	0	0	1	0	0	0	no
2	5	high	exurban	fish	fish	fish	fish	fish	3	0	boy	sixth	0	0	1	0	0	0	no
2	5	high	exurban	Puppy	baby dog	dog	dog	mammal	3	0	girl	sixth	0	0	1	0	0	0	no
2	5	high	exurban	Hamsters	hamster	hamster	small mammal	mammal	3	0	girl	sixth	0	0	1	0	0	0	no
2	5	high	exurban	Baby mouse	baby mouse	mouse	small mammal	mammal	1	0	girl	sixth	0	0	1	0	0	0	no
2	5	high	exurban	Baby Bunny	baby rabbit	rabbit	rabbit	mammal	3	0	girl	sixth	0	0	1	0	0	0	no
2	5	high	exurban	cat	cat	cat	cat	mammal	3	0	boy	sixth	0	0	1	0	0	0	no
2	5	high	exurban	cheeta	cheetah	cheetah	felid	mammal	1	0	boy	sixth	0	0	1	0	0	0	no
2	5	high	exurban	dog	dog	dog	dog	mammal	3	0	boy	sixth	0	0	1	0	0	0	no
2	5	high	exurban	lion	lion	lion	big cat	mammal	1	0	boy	sixth	0	0	1	0	0	0	no
2	5	high	exurban	lizard tureles pregan owls	lizard	lizard	lizard	reptile	3	0	boy	sixth	0	1	0	0	0	0	no
2	5	high	exurban	owl	owl	owl	raptor or owl	bird	2	1	boy	sixth	0	1	0	0	0	0	no
2	5	high	exurban	turtle	turtle	turtle	turtle	reptile	3	0	boy	sixth	0	1	0	0	0	0	no
2	5	high	exurban	chetah	cheetah	cheetah	felid	mammal	1	0	boy	sixth	0	0	1	0	0	0	no
2	5	high	exurban	dolphins	dolphin	dolphin	marine mammal	mammal	1	0	boy	sixth	0	0	1	0	0	0	no
2	5	high	exurban	kangaroo	kangaroo	kangaroo	marsupial	mammal	1	0	boy	sixth	0	0	1	0	0	0	no
2	5	high	exurban	rabbit	rabbit	rabbit	rabbit	mammal	3	0	boy	sixth	0	0	1	0	0	0	no
2	5	high	exurban	dogs	dog	dog	dog	mammal	3	0	girl	sixth	0	0	0	0	1	1	no
2	5	high	exurban	puppies	baby dog	dog	dog	mammal	3	0	girl	sixth	0	0	0	0	1	1	no
2	5	high	exurban	baby lions	baby lion	lion	big cat	mammal	1	0	girl	sixth	0	0	0	0	1	1	no
2	5	high	exurban	baby tigers	baby tiger	tiger	big cat	mammal	1	0	girl	sixth	0	0	0	0	1	1	no
2	5	high	exurban	bobcat	bobcat	bobcat	felid	mammal	0	1	boy	sixth	0	1	0	0	0	0	no
2	5	high	exurban	cat	cat	cat	cat	mammal	3	0	boy	sixth	0	1	0	0	0	0	no
2	5	high	exurban	dog	dog	dog	dog	mammal	3	0	boy	sixth	0	1	0	0	0	0	no
2	5	high	exurban	wolf	wolf	wolf	canid	mammal	1	0	boy	sixth	0	1	0	0	0	0	no
2	5	high	exurban	deer	deer	deer	ungulate	mammal	2	1	boy	sixth	0	0	0	0	1	0	yes
2	5	high	exurban	dog	dog	dog	dog	mammal	3	0	boy	sixth	0	0	0	0	1	0	yes
2	5	high	exurban	wale	whale	whale	marine mammal	mammal	1	0	boy	sixth	0	0	0	0	1	0	yes
2	5	high	exurban	cat	cat	cat	cat	mammal	3	0	boy	sixth	0	0	1	0	0	1	no
2	5	high	exurban	dog	dog	dog	dog	mammal	3	0	boy	sixth	0	0	1	0	0	1	no
2	5	high	exurban	monkey	monkey	monkey	primate	mammal	1	0	boy	sixth	0	0	1	0	0	1	no
2	5	high	exurban	pinguin	penguin	penguin	aquatic bird	bird	1	0	boy	sixth	0	0	1	0	0	1	no
2	5	high	exurban	huskies	Siberian husky	dog	dog	mammal	3	0	girl	sixth	0	0	1	0	0	0	no response
2	5	high	exurban	pugs	pug	dog	dog	mammal	3	0	girl	sixth	0	0	1	0	0	0	no response
2	5	high	exurban	hamsters	hamster	hamster	small mammal	mammal	3	0	girl	sixth	0	0	1	0	0	0	no response
2	5	high	exurban	monkeys	monkey	monkey	primate	mammal	1	0	girl	sixth	0	0	1	0	0	0	no response
2	5	high	exurban	cats	cat	cat	cat	mammal	3	0	girl	sixth	0	0	0	0	1	0	no
2	5	high	exurban	dogs	dog	dog	dog	mammal	3	0	girl	sixth	0	0	0	0	1	0	no
2	5	high	exurban	girrafees	giraffe	giraffe	African megafauna	mammal	1	0	girl	sixth	0	0	0	0	1	0	no
2	5	high	exurban	turtles	turtle	turtle	turtle	reptile	3	0	girl	sixth	0	0	0	0	1	0	no
2	5	high	exurban	bat	bat	bat	bat	mammal	2	1	boy	sixth	0	0	1	0	0	0	no
2	5	high	exurban	black bear	black bear	black bear	bear	mammal	0	1	boy	sixth	0	0	1	0	0	0	no
2	5	high	exurban	hyena	hyena	hyena	other carnivore	mammal	1	0	boy	sixth	0	0	1	0	0	0	no
2	5	high	exurban	skunk	skunk	skunk	other carnivore	mammal	2	1	boy	sixth	0	0	1	0	0	0	no
2	5	high	exurban	cat	cat	cat	cat	mammal	3	0	boy	sixth	0	0	0	0	1	0	yes
2	5	high	exurban	dog	dog	dog	dog	mammal	3	0	boy	sixth	0	0	0	0	1	0	yes
2	5	high	exurban	pig	pig	pig	domestic ungulate	mammal	3	0	boy	sixth	0	0	0	0	1	0	yes
2	5	high	exurban	bunny	rabbit	rabbit	rabbit	mammal	3	0	boy	sixth	0	0	0	0	1	0	yes
2	5	high	exurban	dogs	dog	dog	dog	mammal	3	0	girl	sixth	0	0	0	0	1	0	yes
2	5	high	exurban	horses	horse	horse	domestic ungulate	mammal	3	0	girl	sixth	0	0	0	0	1	0	yes
2	5	high	exurban	parrot	parrot	parrot	songbird or parrot	bird	1	0	girl	sixth	0	0	0	0	1	0	yes
2	5	high	exurban	snakes	snake	snake	snake	reptile	3	0	girl	sixth	0	0	0	0	1	0	yes
2	5	high	exurban	cats	cat	cat	cat	mammal	3	0	girl	sixth	0	0	1	0	0	0	no
2	5	high	exurban	humming bird	hummingbird	hummingbird	songbird or parrot	bird	1	0	girl	sixth	0	0	1	0	0	0	no
2	5	high	exurban	panda	panda	panda	bear	mammal	1	0	girl	sixth	0	0	1	0	0	0	no
2	5	high	exurban	squarrels	squirrel	squirrel	small mammal	mammal	2	1	girl	sixth	0	0	1	0	0	0	no
2	5	high	exurban	puppy	baby dog	dog	dog	mammal	3	0	girl	sixth	0	1	0	0	0	0	no
2	5	high	exurban	hamster	hamster	hamster	small mammal	mammal	3	0	girl	sixth	0	1	0	0	0	0	no
2	5	high	exurban	rabbit	rabbit	rabbit	rabbit	mammal	3	0	girl	sixth	0	1	0	0	0	0	no
2	5	high	exurban	dog	dog	dog	dog	mammal	3	0	boy	sixth	0	0	0	0	0	0	no response
2	5	high	exurban	ducks	duck	duck	aquatic bird	bird	2	1	boy	sixth	0	0	0	0	0	0	no response
2	5	high	exurban	shark	shark	shark	shark	fish	1	0	boy	sixth	0	0	0	0	0	0	no response
2	5	high	exurban	cheatua	cheetah	cheetah	felid	mammal	1	0	boy	sixth	0	0	0	0	1	0	yes
2	5	high	exurban	baby tiger	baby tiger	tiger	big cat	mammal	1	0	boy	sixth	0	0	0	0	1	0	yes
2	5	high	exurban	tiger	tiger	tiger	big cat	mammal	1	0	boy	sixth	0	0	0	0	1	0	yes
2	5	high	exurban	white tiger	white tiger	tiger	big cat	mammal	1	0	boy	sixth	0	0	0	0	1	0	yes
2	5	high	exurban	baracuda	barracuda	barracuda	fish	fish	1	0	boy	sixth	0	0	0	0	1	0	yes
2	5	high	exurban	shark	shark	shark	shark	fish	1	0	boy	sixth	0	0	0	0	1	0	yes
2	5	high	exurban	sordfish	swordfish	swordfish	fish	fish	1	0	boy	sixth	0	0	0	0	1	0	yes
2	5	high	exurban	whale	whale	whale	marine mammal	mammal	1	0	boy	sixth	0	0	0	0	1	0	yes
2	5	high	exurban	elephants	elephant	elephant	African megafauna	mammal	1	0	boy	sixth	0	0	0	0	1	0	no
2	5	high	exurban	lions	lion	lion	big cat	mammal	1	0	boy	sixth	0	0	0	0	1	0	no
2	5	high	exurban	tiger	tiger	tiger	big cat	mammal	1	0	boy	sixth	0	0	0	0	1	0	no
2	5	high	exurban	turtles	turtle	turtle	turtle	reptile	3	0	boy	sixth	0	0	0	0	1	0	no
2	5	high	exurban	chickens	chicken	chicken	ground bird	bird	3	0	girl	sixth	0	0	1	0	0	0	no
2	5	high	exurban	dogs	dog	dog	dog	mammal	3	0	girl	sixth	0	0	1	0	0	0	no
2	5	high	exurban	penguins	penguin	penguin	aquatic bird	bird	1	0	girl	sixth	0	0	1	0	0	0	no
2	5	high	exurban	zebra	zebra	zebra	ungulate	mammal	1	0	girl	sixth	0	0	1	0	0	0	no
2	5	high	exurban	cat	cat	cat	cat	mammal	3	0	boy	sixth	0	1	0	0	0	0	no
2	5	high	exurban	dogs	dog	dog	dog	mammal	3	0	boy	sixth	0	1	0	0	0	0	no
2	5	high	exurban	gerbil	gerbil	gerbil	small mammal	mammal	3	0	boy	sixth	0	1	0	0	0	0	no
2	5	high	exurban	Dogs	dog	dog	dog	mammal	3	0	girl	sixth	0	0	1	0	0	0	no
2	5	high	exurban	Elephants	elephant	elephant	African megafauna	mammal	1	0	girl	sixth	0	0	1	0	0	0	no
2	5	high	exurban	Horses	horse	horse	domestic ungulate	mammal	3	0	girl	sixth	0	0	1	0	0	0	no
2	5	high	exurban	Sea turtles	sea turtle	sea turtle	turtle	reptile	1	0	girl	sixth	0	0	1	0	0	0	no
2	5	high	exurban	cat	cat	cat	cat	mammal	3	0	girl	sixth	0	0	0	0	0	1	no
2	5	high	exurban	dogs	dog	dog	dog	mammal	3	0	girl	sixth	0	0	0	0	0	1	no
2	5	high	exurban	hamsters	hamster	hamster	small mammal	mammal	3	0	girl	sixth	0	0	0	0	0	1	no
2	5	high	exurban	panda	panda	panda	bear	mammal	1	0	girl	sixth	0	0	0	0	0	1	no
2	5	high	exurban	coyotes	coyote	coyote	canid	mammal	0	1	girl	sixth	0	0	0	0	1	0	no
2	5	high	exurban	wener dog	dachshund	dog	dog	mammal	3	0	girl	sixth	0	0	0	0	1	0	no
2	5	high	exurban	eleafent	elephant	elephant	African megafauna	mammal	1	0	girl	sixth	0	0	0	0	1	0	no
2	5	high	exurban	HORSES	horse	horse	domestic ungulate	mammal	3	0	girl	sixth	0	0	0	0	1	0	no
2	5	high	exurban	antalope	antelope	antelope	ungulate	mammal	1	0	boy	sixth	0	0	1	0	0	0	no
2	5	high	exurban	hawk	hawk	hawk	raptor or owl	bird	2	1	boy	sixth	0	0	1	0	0	0	no
2	5	high	exurban	lion	lion	lion	big cat	mammal	1	0	boy	sixth	0	0	1	0	0	0	no
2	5	high	exurban	vulture	vulture	vulture	raptor or owl	bird	1	0	boy	sixth	0	0	1	0	0	0	no
2	5	high	exurban	deer	deer	deer	ungulate	mammal	2	1	boy	sixth	0	0	0	0	1	0	yes
2	5	high	exurban	foxes	fox	fox	canid	mammal	2	1	boy	sixth	0	0	0	0	1	0	yes
2	5	high	exurban	racoons	raccoon	raccoon	other carnivore	mammal	0	1	boy	sixth	0	0	0	0	1	0	yes
2	5	high	exurban	squiles	squirrel	squirrel	small mammal	mammal	2	1	boy	sixth	0	0	0	0	1	0	yes
2	5	high	exurban	dog	dog	dog	dog	mammal	3	0	girl	sixth	0	0	0	0	1	0	yes
2	5	high	exurban	dolfen	dolphin	dolphin	marine mammal	mammal	1	0	girl	sixth	0	0	0	0	1	0	yes
2	5	high	exurban	elaphant	elephant	elephant	African megafauna	mammal	1	0	girl	sixth	0	0	0	0	1	0	yes
2	5	high	exurban	squirl	squirrel	squirrel	small mammal	mammal	2	1	girl	sixth	0	0	0	0	1	0	yes
2	5	high	exurban	cheta	cheetah	cheetah	felid	mammal	1	0	girl	sixth	0	0	1	0	0	0	no
2	5	high	exurban	dog	dog	dog	dog	mammal	3	0	girl	sixth	0	0	1	0	0	0	no
2	5	high	exurban	monky	monkey	monkey	primate	mammal	1	0	girl	sixth	0	0	1	0	0	0	no
2	5	high	exurban	pandas	panda	panda	bear	mammal	1	0	girl	sixth	0	0	1	0	0	0	no
2	5	high	exurban	cats	cat	cat	cat	mammal	3	0	girl	sixth	0	0	0	0	1	0	yes
2	5	high	exurban	dogs	dog	dog	dog	mammal	3	0	girl	sixth	0	0	0	0	1	0	yes
2	5	high	exurban	elifant	elephant	elephant	African megafauna	mammal	1	0	girl	sixth	0	0	0	0	1	0	yes
2	5	high	exurban	horse	horse	horse	domestic ungulate	mammal	3	0	girl	sixth	0	0	0	0	1	0	yes
2	5	high	exurban	cat	cat	cat	cat	mammal	3	0	boy	sixth	0	0	0	0	1	0	no
2	5	high	exurban	chicken	chicken	chicken	ground bird	bird	3	0	boy	sixth	0	0	0	0	1	0	no
2	5	high	exurban	dog	dog	dog	dog	mammal	3	0	boy	sixth	0	0	0	0	1	0	no
2	5	high	exurban	duck	duck	duck	aquatic bird	bird	2	1	boy	sixth	0	0	0	0	1	0	no
2	5	high	exurban	Dogs	dog	dog	dog	mammal	3	0	girl	sixth	0	1	0	0	0	0	no
2	5	high	exurban	Dolphins	dolphin	dolphin	marine mammal	mammal	1	0	girl	sixth	0	1	0	0	0	0	no
2	5	high	exurban	Fish	fish	fish	fish	fish	3	0	girl	sixth	0	1	0	0	0	0	no
2	5	high	exurban	Hamster	hamster	hamster	small mammal	mammal	3	0	girl	sixth	0	1	0	0	0	0	no
2	5	high	exurban	cat	cat	cat	cat	mammal	3	0	girl	sixth	0	0	0	0	1	0	yes
2	5	high	exurban	dog	dog	dog	dog	mammal	3	0	girl	sixth	0	0	0	0	1	0	yes
2	5	high	exurban	elephants	elephant	elephant	African megafauna	mammal	1	0	girl	sixth	0	0	0	0	1	0	yes
2	5	high	exurban	owls	owl	owl	raptor or owl	bird	2	1	girl	sixth	0	0	0	0	1	0	yes
1	5	high	exurban	apes	ape	ape	primate	mammal	1	0	boy	sixth	0	0	0	0	1	0	no response
1	5	high	exurban	birds	bird	bird	bird	bird	3	0	boy	sixth	0	0	0	0	1	0	no response
1	5	high	exurban	other bugs	insect	insect	insect	terrestrial invertebrate	2	1	boy	sixth	0	0	0	0	1	0	no response
1	5	high	exurban	monkeys	monkey	monkey	primate	mammal	1	0	boy	sixth	0	0	0	0	1	0	no response
3	5	high	exurban	cats	cat	cat	cat	mammal	3	0	boy	sixth	0	0	0	0	1	0	yes
3	5	high	exurban	cows!!!!!!	cow	cow	domestic ungulate	mammal	3	0	boy	sixth	0	0	0	0	1	0	yes
3	5	high	exurban	dogs	dog	dog	dog	mammal	3	0	boy	sixth	0	0	0	0	1	0	yes
3	5	high	exurban	hippos!!!!!!!!	hippopotamus	hippopotamus	African megafauna	mammal	1	0	boy	sixth	0	0	0	0	1	0	yes
2	5	high	exurban	cat	cat	cat	cat	mammal	3	0	boy	sixth	0	0	0	0	1	1	no
2	5	high	exurban	kitten	baby cat	cat	cat	mammal	3	0	boy	sixth	0	0	0	0	1	1	no
2	5	high	exurban	kittie	baby cat	cat	cat	mammal	3	0	boy	sixth	0	0	0	0	1	1	no
2	5	high	exurban	dog	dog	dog	dog	mammal	3	0	boy	sixth	0	0	0	0	1	1	no
3	5	high	exurban	frog	frog	frog	amphibian	amphibian	2	0	boy	sixth	0	0	0	0	1	0	no
3	5	high	exurban	pigs	pig	pig	domestic ungulate	mammal	3	0	boy	sixth	0	0	0	0	1	0	no
3	5	high	exurban	rabbits	rabbit	rabbit	rabbit	mammal	3	0	boy	sixth	0	0	0	0	1	0	no
3	5	high	exurban	turtles	turtle	turtle	turtle	reptile	3	0	boy	sixth	0	0	0	0	1	0	no
3	5	high	exurban	arctic wolf	arctic wolf	arctic wolf	canid	mammal	1	0	girl	sixth	0	0	0	0	1	0	no
3	5	high	exurban	deer	deer	deer	ungulate	mammal	2	1	girl	sixth	0	0	0	0	1	0	no
3	5	high	exurban	fox	fox	fox	canid	mammal	2	1	girl	sixth	0	0	0	0	1	0	no
3	5	high	exurban	rabbit	rabbit	rabbit	rabbit	mammal	3	0	girl	sixth	0	0	0	0	1	0	no
3	5	high	exurban	fox	fox	fox	canid	mammal	2	1	girl	sixth	0	0	0	0	1	0	no
3	5	high	exurban	gotes	gorilla	gorilla	primate	mammal	1	0	girl	sixth	0	0	0	0	1	0	no
3	5	high	exurban	horse	horse	horse	domestic ungulate	mammal	3	0	girl	sixth	0	0	0	0	1	0	no
3	5	high	exurban	ponys	pony	pony	domestic ungulate	mammal	3	0	girl	sixth	0	0	0	0	1	0	no
2	5	high	exurban	cat	cat	cat	cat	mammal	3	0	boy	sixth	0	0	0	0	1	0	no
2	5	high	exurban	dog	dog	dog	dog	mammal	3	0	boy	sixth	0	0	0	0	1	0	no
2	5	high	exurban	lion	lion	lion	big cat	mammal	1	0	boy	sixth	0	0	0	0	1	0	no
2	5	high	exurban	panda	panda	panda	bear	mammal	1	0	boy	sixth	0	0	0	0	1	0	no
2	5	high	exurban	dogs	dog	dog	dog	mammal	3	0	girl	sixth	0	0	0	0	1	0	no
2	5	high	exurban	dolphins	dolphin	dolphin	marine mammal	mammal	1	0	girl	sixth	0	0	0	0	1	0	no
2	5	high	exurban	wolf	wolf	wolf	canid	mammal	1	0	girl	sixth	0	0	0	0	1	0	no
3	5	high	exurban	Fox	fox	fox	canid	mammal	2	1	girl	sixth	0	0	0	0	1	0	no
3	5	high	exurban	Horse	horse	horse	domestic ungulate	mammal	3	0	girl	sixth	0	0	0	0	1	0	no
3	5	high	exurban	Pony	pony	pony	domestic ungulate	mammal	3	0	girl	sixth	0	0	0	0	1	0	no
3	5	high	exurban	Bunnys	rabbit	rabbit	rabbit	mammal	3	0	girl	sixth	0	0	0	0	1	0	no
3	5	high	exurban	House cats	cat	cat	cat	mammal	3	0	girl	sixth	0	0	0	0	1	0	no
3	5	high	exurban	Wild cats	cat	cat	cat	mammal	3	0	girl	sixth	0	0	0	0	1	0	no
3	5	high	exurban	Dogs	dog	dog	dog	mammal	3	0	girl	sixth	0	0	0	0	1	0	no
3	5	high	exurban	Fox	fox	fox	canid	mammal	2	1	girl	sixth	0	0	0	0	1	0	no
3	5	high	exurban	cat	cat	cat	cat	mammal	3	0	boy	sixth	0	0	0	0	1	0	yes
3	5	high	exurban	cows!!!!!	cow	cow	domestic ungulate	mammal	3	0	boy	sixth	0	0	0	0	1	0	yes
3	5	high	exurban	dog	dog	dog	dog	mammal	3	0	boy	sixth	0	0	0	0	1	0	yes
3	5	high	exurban	hippos!!!	hippopotamus	hippopotamus	African megafauna	mammal	1	0	boy	sixth	0	0	0	0	1	0	yes
3	5	high	exurban	cat	cat	cat	cat	mammal	3	0	boy	sixth	0	0	0	1	1	0	no
3	5	high	exurban	dog	dog	dog	dog	mammal	3	0	boy	sixth	0	0	0	1	1	0	no
3	5	high	exurban	hamster	hamster	hamster	small mammal	mammal	3	0	boy	sixth	0	0	0	1	1	0	no
3	5	high	exurban	turtle	turtle	turtle	turtle	reptile	3	0	boy	sixth	0	0	0	1	1	0	no
3	5	high	exurban	dogs	dog	dog	dog	mammal	3	0	boy	sixth	0	1	0	0	0	0	no
3	5	high	exurban	monkeys	mokney	mokney	primate	mammal	1	0	boy	sixth	0	1	0	0	0	0	no
3	5	high	exurban	panda	panda	panda	bear	mammal	1	0	boy	sixth	0	1	0	0	0	0	no
3	5	high	exurban	baby chimpanzees	baby chimpanzee	chimpanzee	primate	mammal	1	0	girl	sixth	0	1	1	1	0	0	no
3	5	high	exurban	baby deers	baby deer	deer	ungulate	mammal	2	1	girl	sixth	0	1	1	1	0	0	no
3	5	high	exurban	dogs	dog	dog	dog	mammal	3	0	girl	sixth	0	1	1	1	0	0	no
3	5	high	exurban	pandas	panda	panda	bear	mammal	1	0	girl	sixth	0	1	1	1	0	0	no
3	5	high	exurban	DOGS	dog	dog	dog	mammal	3	0	girl	sixth	0	0	1	0	0	0	no
3	5	high	exurban	horses	horse	horse	domestic ungulate	mammal	3	0	girl	sixth	0	0	1	0	0	0	no
3	5	high	exurban	Jaguar	jaguar	jaguar	big cat	mammal	1	0	girl	sixth	0	0	1	0	0	0	no
3	5	high	exurban	bird	bird	bird	bird	bird	3	0	boy	sixth	0	0	1	0	0	0	no
3	5	high	exurban	cheetah	cheetah	cheetah	felid	mammal	1	0	boy	sixth	0	0	1	0	0	0	no
3	5	high	exurban	dog	dog	dog	dog	mammal	3	0	boy	sixth	0	0	1	0	0	0	no
3	5	high	exurban	bunny	rabbit	rabbit	rabbit	mammal	3	0	boy	sixth	0	0	1	0	0	0	no
3	5	high	exurban	Kittens	baby cat	cat	cat	mammal	3	0	girl	sixth	0	0	0	0	1	1	yes
3	5	high	exurban	Dog	dog	dog	dog	mammal	3	0	girl	sixth	0	0	0	0	1	1	yes
3	5	high	exurban	Dolphins	dolphin	dolphin	marine mammal	mammal	1	0	girl	sixth	0	0	0	0	1	1	yes
3	5	high	exurban	Horse	horse	horse	domestic ungulate	mammal	3	0	girl	sixth	0	0	0	0	1	1	yes
3	5	high	exurban	monkeys	monkey	monkey	primate	mammal	1	0	boy	sixth	0	0	0	0	1	0	yes
3	5	high	exurban	pandas	panda	panda	bear	mammal	1	0	boy	sixth	0	0	0	0	1	0	yes
3	5	high	exurban	panther	panther	panther	big cat	mammal	1	0	boy	sixth	0	0	0	0	1	0	yes
3	5	high	exurban	sharks	shark	shark	shark	fish	1	0	boy	sixth	0	0	0	0	1	0	yes
3	5	high	exurban	dogs	dog	dog	dog	mammal	3	0	girl	sixth	0	0	0	1	0	1	no
3	5	high	exurban	dolphins	dolphin	dolphin	marine mammal	mammal	1	0	girl	sixth	0	0	0	1	0	1	no
3	5	high	exurban	horses	horse	horse	domestic ungulate	mammal	3	0	girl	sixth	0	0	0	1	0	1	no
3	5	high	exurban	tigers	tiger	tiger	big cat	mammal	1	0	girl	sixth	0	0	0	1	0	1	no
3	5	high	exurban	Cats	cat	cat	cat	mammal	3	0	girl	sixth	0	0	0	0	1	0	no
3	5	high	exurban	Dogs	dog	dog	dog	mammal	3	0	girl	sixth	0	0	0	0	1	0	no
3	5	high	exurban	Pandas	panda	panda	bear	mammal	1	0	girl	sixth	0	0	0	0	1	0	no
3	5	high	exurban	Bunnies	rabbit	rabbit	rabbit	mammal	3	0	girl	sixth	0	0	0	0	1	0	no
3	5	high	exurban	cheetah	cheetah	cheetah	felid	mammal	1	0	boy	sixth	0	0	1	0	0	0	no
3	5	high	exurban	dog	dog	dog	dog	mammal	3	0	boy	sixth	0	0	1	0	0	0	no
3	5	high	exurban	panda	panda	panda	bear	mammal	1	0	boy	sixth	0	0	1	0	0	0	no
3	5	high	exurban	polar bears	polar bear	polar bear	bear	mammal	1	0	boy	sixth	0	0	1	0	0	0	no
3	5	high	exurban	Horses	horse	horse	domestic ungulate	mammal	3	0	girl	sixth	0	0	0	1	1	0	no
3	5	high	exurban	Kangaroo	kangaroo	kangaroo	marsupial	mammal	1	0	girl	sixth	0	0	0	1	1	0	no
3	5	high	exurban	Lions	lion	lion	big cat	mammal	1	0	girl	sixth	0	0	0	1	1	0	no
3	5	high	exurban	Zedras	zebra	zebra	ungulate	mammal	1	0	girl	sixth	0	0	0	1	1	0	no
3	5	high	exurban	puppy	baby dog	dog	dog	mammal	3	0	girl	sixth	0	0	1	0	0	0	no
3	5	high	exurban	Dolphen	dolphin	dolphin	marine mammal	mammal	1	0	girl	sixth	0	0	1	0	0	0	no
3	5	high	exurban	Trutle	turtle	turtle	turtle	reptile	3	0	girl	sixth	0	0	1	0	0	0	no
3	5	high	exurban	Whale	whale	whale	marine mammal	mammal	1	0	girl	sixth	0	0	1	0	0	0	no
3	5	high	exurban	bobcat	bobcat	bobcat	felid	mammal	0	1	boy	sixth	0	0	1	0	0	0	no
3	5	high	exurban	chickins	chicken	chicken	ground bird	bird	3	0	boy	sixth	0	0	1	0	0	0	no
3	5	high	exurban	dogs	dog	dog	dog	mammal	3	0	boy	sixth	0	0	1	0	0	0	no
3	5	high	exurban	monkey	monkey	monkey	primate	mammal	1	0	boy	sixth	0	0	1	0	0	0	no
3	5	high	exurban	Birds	bird	bird	bird	bird	3	0	boy	sixth	0	0	0	0	1	0	no
3	5	high	exurban	Cats	cat	cat	cat	mammal	3	0	boy	sixth	0	0	0	0	1	0	no
3	5	high	exurban	Doges	dog	dog	dog	mammal	3	0	boy	sixth	0	0	0	0	1	0	no
3	5	high	exurban	Fish	fish	fish	fish	fish	3	0	boy	sixth	0	0	0	0	1	0	no
3	5	high	exurban	bull	bull	cow	domestic ungulate	mammal	3	0	boy	sixth	0	0	1	0	0	0	yes
3	5	high	exurban	shark	shark	shark	shark	fish	1	0	boy	sixth	0	0	1	0	0	0	yes
3	5	high	exurban	snake	snake	snake	snake	reptile	3	0	boy	sixth	0	0	1	0	0	0	yes
3	5	high	exurban	cat	cat	cat	cat	mammal	3	0	boy	sixth	0	0	0	0	1	0	yes
3	5	high	exurban	dog	dog	dog	dog	mammal	3	0	boy	sixth	0	0	0	0	1	0	yes
3	5	high	exurban	monkey	monkey	monkey	primate	mammal	1	0	boy	sixth	0	0	0	0	1	0	yes
3	5	high	exurban	rabbit	rabbit	rabbit	rabbit	mammal	3	0	boy	sixth	0	0	0	0	1	0	yes
3	5	high	exurban	cats	cat	cat	cat	mammal	3	0	girl	sixth	0	0	0	0	1	0	yes
3	5	high	exurban	dogs	dog	dog	dog	mammal	3	0	girl	sixth	0	0	0	0	1	0	yes
3	5	high	exurban	elaphant	elephant	elephant	African megafauna	mammal	1	0	girl	sixth	0	0	0	0	1	0	yes
3	5	high	exurban	panda	panda	panda	bear	mammal	1	0	girl	sixth	0	0	0	0	1	0	yes
3	5	high	exurban	cats	cat	cat	cat	mammal	3	0	boy	sixth	0	0	0	0	1	0	no
3	5	high	exurban	dobermen	dobermen	dog	dog	mammal	3	0	boy	sixth	0	0	0	0	1	0	no
3	5	high	exurban	parit	parrot	parrot	songbird or parrot	bird	1	0	boy	sixth	0	0	0	0	1	0	no
3	5	high	exurban	doliphin	dolphin	dolphin	marine mammal	mammal	1	0	girl	sixth	0	0	0	1	1	0	yes
3	5	high	exurban	panda	panda	panda	bear	mammal	1	0	girl	sixth	0	0	0	1	1	0	yes
3	5	high	exurban	rabbit	rabbit	rabbit	rabbit	mammal	3	0	girl	sixth	0	0	0	1	1	0	yes
3	5	high	exurban	turtle	turtle	turtle	turtle	reptile	3	0	girl	sixth	0	0	0	1	1	0	yes
3	5	high	exurban	baby bears	baby bear	bear	bear	mammal	2	1	boy	sixth	0	1	0	0	0	0	no
3	5	high	exurban	kittens	baby cat	cat	cat	mammal	3	0	boy	sixth	0	1	0	0	0	0	no
3	5	high	exurban	puppys	baby dog	dog	dog	mammal	3	0	boy	sixth	0	1	0	0	0	0	no
3	5	high	exurban	wolfs	wolf	wolf	canid	mammal	1	0	boy	sixth	0	1	0	0	0	0	no
3	5	high	exurban	hedgehog	hedgehog	hedgehog	small mammal	mammal	1	0	boy	sixth	0	0	0	0	1	0	no
3	5	high	exurban	panda	panda	panda	bear	mammal	1	0	boy	sixth	0	0	0	0	1	0	no
3	5	high	exurban	rabbit	rabbit	rabbit	rabbit	mammal	3	0	boy	sixth	0	0	0	0	1	0	no
3	5	high	exurban	whale	whale	whale	marine mammal	mammal	1	0	boy	sixth	0	0	0	0	1	0	no
3	5	high	exurban	bars	bear	bear	bear	mammal	2	1	girl	sixth	0	0	0	0	0	1	no
3	5	high	exurban	cheeta	cheetah	cheetah	felid	mammal	1	0	girl	sixth	0	0	0	0	0	1	no
3	5	high	exurban	lions	lion	lion	big cat	mammal	1	0	girl	sixth	0	0	0	0	0	1	no
3	5	high	exurban	wite tigers	white tiger	tiger	big cat	mammal	1	0	girl	sixth	0	0	0	0	0	1	no
3	5	high	exurban	pana	panda	panda	bear	mammal	1	0	boy	sixth	0	0	1	0	0	0	no
3	5	high	exurban	trger	tiger	tiger	big cat	mammal	1	0	boy	sixth	0	0	1	0	0	0	no
3	5	high	exurban	wolf	wolf	wolf	canid	mammal	1	0	boy	sixth	0	0	1	0	0	0	no
3	5	high	exurban	Deer	deer	deer	ungulate	mammal	2	1	girl	sixth	0	1	0	0	0	0	no
3	5	high	exurban	Panda	panda	panda	bear	mammal	1	0	girl	sixth	0	1	0	0	0	0	no
3	5	high	exurban	Rabbit	rabbit	rabbit	rabbit	mammal	3	0	girl	sixth	0	1	0	0	0	0	no
3	5	high	exurban	Zebra	zebra	zebra	ungulate	mammal	1	0	girl	sixth	0	1	0	0	0	0	no
3	5	high	exurban	horse	horse	horse	domestic ungulate	mammal	3	0	girl	sixth	0	0	0	0	1	0	no
3	5	high	exurban	lion	lion	lion	big cat	mammal	1	0	girl	sixth	0	0	0	0	1	0	no
3	5	high	exurban	owl	owl	owl	raptor or owl	bird	2	1	girl	sixth	0	0	0	0	1	0	no
3	5	high	exurban	wolf	wolf	wolf	canid	mammal	1	0	girl	sixth	0	0	0	0	1	0	no
3	5	high	exurban	cat	cat	cat	cat	mammal	3	0	girl	sixth	0	0	0	0	1	0	yes
3	5	high	exurban	dog	dog	dog	dog	mammal	3	0	girl	sixth	0	0	0	0	1	0	yes
3	5	high	exurban	horse	horse	horse	domestic ungulate	mammal	3	0	girl	sixth	0	0	0	0	1	0	yes
3	5	high	exurban	zebra	zebra	zebra	ungulate	mammal	1	0	girl	sixth	0	0	0	0	1	0	yes
3	5	high	exurban	cheetah	cheetah	cheetah	felid	mammal	1	0	boy	sixth	0	0	1	0	0	0	no
3	5	high	exurban	horse	horse	horse	domestic ungulate	mammal	3	0	boy	sixth	0	0	1	0	0	0	no
3	5	high	exurban	monkey	monkey	monkey	primate	mammal	1	0	boy	sixth	0	0	1	0	0	0	no
3	5	high	exurban	panther	panther	panther	big cat	mammal	1	0	boy	sixth	0	0	1	0	0	0	no
3	5	high	exurban	dog	dog	dog	dog	mammal	3	0	boy	sixth	0	0	0	0	1	0	yes
3	5	high	exurban	mama grizzly bear	grizzly bear	grizzly bear	bear	mammal	1	0	boy	sixth	0	0	0	0	1	0	yes
3	5	high	exurban	lion	lion	lion	big cat	mammal	1	0	boy	sixth	0	0	0	0	1	0	yes
3	5	high	exurban	bobcats	bobcat	bobcat	felid	mammal	0	1	boy	sixth	0	0	0	1	1	0	no
3	5	high	exurban	kangaroo	kangaroo	kangaroo	marsupial	mammal	1	0	boy	sixth	0	0	0	1	1	0	no
3	5	high	exurban	lion	lion	lion	big cat	mammal	1	0	boy	sixth	0	0	0	1	1	0	no
3	5	high	exurban	panda	panda	panda	bear	mammal	1	0	boy	sixth	0	0	0	1	1	0	no
3	5	high	exurban	cheata	cheetah	cheetah	felid	mammal	1	0	girl	sixth	0	0	0	0	1	0	no
3	5	high	exurban	dolphin	dolphin	dolphin	marine mammal	mammal	1	0	girl	sixth	0	0	0	0	1	0	no
3	5	high	exurban	finger monkey	finger monkey	finger monkey	primate	mammal	1	0	girl	sixth	0	0	0	0	1	0	no
3	5	high	exurban	panda	panda	panda	bear	mammal	1	0	girl	sixth	0	0	0	0	1	0	no
3	5	high	exurban	alligator	alligator	alligator	alligator or crocodile	reptile	1	0	boy	sixth	0	0	0	1	0	0	yes
3	5	high	exurban	bear	bear	bear	bear	mammal	2	1	boy	sixth	0	0	0	1	0	0	yes
3	5	high	exurban	cheatah	cheetah	cheetah	felid	mammal	1	0	boy	sixth	0	0	0	1	0	0	yes
3	5	high	exurban	deer	deer	deer	ungulate	mammal	2	1	boy	sixth	0	0	0	1	0	0	yes
3	5	high	exurban	Cats	cat	cat	cat	mammal	3	0	boy	sixth	0	0	0	0	1	0	yes
3	5	high	exurban	Dogs	dog	dog	dog	mammal	3	0	boy	sixth	0	0	0	0	1	0	yes
3	5	high	exurban	Ducks	duck	duck	aquatic bird	bird	2	1	boy	sixth	0	0	0	0	1	0	yes
3	5	high	exurban	Goats	goat	goat	domestic ungulate	mammal	3	0	boy	sixth	0	0	0	0	1	0	yes
3	5	high	exurban	cats	cat	cat	cat	mammal	3	0	girl	sixth	0	0	0	1	1	0	no
3	5	high	exurban	dogs	dog	dog	dog	mammal	3	0	girl	sixth	0	0	0	1	1	0	no
3	5	high	exurban	elefents	elephant	elephant	African megafauna	mammal	1	0	girl	sixth	0	0	0	1	1	0	no
3	5	high	exurban	horses	horse	horse	domestic ungulate	mammal	3	0	girl	sixth	0	0	0	1	1	0	no
3	5	high	exurban	cat	cat	cat	cat	mammal	3	0	boy	sixth	0	0	1	0	0	0	yes
3	5	high	exurban	cows	cow	cow	domestic ungulate	mammal	3	0	boy	sixth	0	0	1	0	0	0	yes
3	5	high	exurban	dog	dog	dog	dog	mammal	3	0	boy	sixth	0	0	1	0	0	0	yes
3	5	high	exurban	pig	pig	pig	domestic ungulate	mammal	3	0	boy	sixth	0	0	1	0	0	0	yes
3	5	high	exurban	dogs	dog	dog	dog	mammal	3	0	girl	sixth	0	0	1	0	0	0	no
3	5	high	exurban	dolphins	dolphin	dolphin	marine mammal	mammal	1	0	girl	sixth	0	0	1	0	0	0	no
3	5	high	exurban	panda	panda	panda	bear	mammal	1	0	girl	sixth	0	0	1	0	0	0	no
3	5	high	exurban	bunny	rabbit	rabbit	rabbit	mammal	3	0	girl	sixth	0	0	1	0	0	0	no
3	5	high	exurban	crocidile	crocodile	crocodile	alligator or crocodile	reptile	1	0	boy	sixth	0	0	1	0	0	1	no
3	5	high	exurban	piranha	piranha	piranha	fish	fish	1	0	boy	sixth	0	0	1	0	0	1	no
3	5	high	exurban	sharks	shark	shark	shark	fish	1	0	boy	sixth	0	0	1	0	0	1	no
3	5	high	exurban	whales	whale	whale	marine mammal	mammal	1	0	boy	sixth	0	0	1	0	0	1	no
3	5	high	exurban	kittens	baby cat	cat	cat	mammal	3	0	girl	sixth	0	0	1	0	0	0	no
3	5	high	exurban	puppies	baby dog	dog	dog	mammal	3	0	girl	sixth	0	0	1	0	0	0	no
3	5	high	exurban	dolphins	dolphin	dolphin	marine mammal	mammal	1	0	girl	sixth	0	0	1	0	0	0	no
3	5	high	exurban	bunnies	rabbit	rabbit	rabbit	mammal	3	0	girl	sixth	0	0	1	0	0	0	no
3	5	high	exurban	cat	cat	cat	cat	mammal	3	0	boy	sixth	0	0	1	0	0	0	no
3	5	high	exurban	ciwawa	chihuahua	dog	dog	mammal	3	0	boy	sixth	0	0	1	0	0	0	no
3	5	high	exurban	dog	dog	dog	dog	mammal	3	0	boy	sixth	0	0	1	0	0	0	no
3	5	high	exurban	panda	panda	panda	bear	mammal	1	0	boy	sixth	0	0	1	0	0	0	no
3	5	high	exurban	torros	bull	cow	domestic ungulate	mammal	3	0	boy	sixth	0	0	0	0	0	1	no
3	5	high	exurban	perros	dog	dog	dog	mammal	3	0	boy	sixth	0	0	0	0	0	1	no
3	5	high	exurban	cat	cat	cat	cat	mammal	3	0	boy	sixth	0	1	1	0	0	0	yes
3	5	high	exurban	dog	dog	dog	dog	mammal	3	0	boy	sixth	0	1	1	0	0	0	yes
3	5	high	exurban	turtle	turtle	turtle	turtle	reptile	3	0	boy	sixth	0	1	1	0	0	0	yes
3	5	high	exurban	wolf	wolf	wolf	canid	mammal	1	0	boy	sixth	0	1	1	0	0	0	yes
3	5	high	exurban	bear	bear	bear	bear	mammal	2	1	boy	sixth	0	0	0	0	1	0	no
3	5	high	exurban	dog	dog	dog	dog	mammal	3	0	boy	sixth	0	0	0	0	1	0	no
3	5	high	exurban	frog	frog	frog	amphibian	amphibian	2	0	boy	sixth	0	0	0	0	1	0	no
3	5	high	exurban	snake	snake	snake	snake	reptile	3	0	boy	sixth	0	0	0	0	1	0	no
3	5	high	exurban	dog	dog	dog	dog	mammal	3	0	boy	sixth	0	0	0	0	1	0	no
3	5	high	exurban	dolphin	dolphin	dolphin	marine mammal	mammal	1	0	boy	sixth	0	0	0	0	1	0	no
3	5	high	exurban	lions	lion	lion	big cat	mammal	1	0	boy	sixth	0	0	0	0	1	0	no
3	5	high	exurban	tiger	tiger	tiger	big cat	mammal	1	0	boy	sixth	0	0	0	0	1	0	no
3	5	high	exurban	dolphins	dolphin	dolphin	marine mammal	mammal	1	0	girl	sixth	0	1	0	0	0	0	no
3	5	high	exurban	jelly fish	jellyfish	jellyfish	marine invertebrate	marine invertebrate	1	0	girl	sixth	0	1	0	0	0	0	no
3	5	high	exurban	panda	panda	panda	bear	mammal	1	0	girl	sixth	0	1	0	0	0	0	no
3	5	high	exurban	zebra	zebra	zebra	ungulate	mammal	1	0	girl	sixth	0	1	0	0	0	0	no
3	5	high	exurban	cats	cat	cat	cat	mammal	3	0	girl	sixth	0	0	1	0	0	0	no
3	5	high	exurban	fish	fish	fish	fish	fish	3	0	girl	sixth	0	0	1	0	0	0	no
3	5	high	exurban	horse	horse	horse	domestic ungulate	mammal	3	0	girl	sixth	0	0	1	0	0	0	no
3	5	high	exurban	turtel	turtle	turtle	turtle	reptile	3	0	girl	sixth	0	0	1	0	0	0	no
3	5	high	exurban	cats	cat	cat	cat	mammal	3	0	girl	sixth	0	0	0	0	1	0	no
3	5	high	exurban	dogs	dog	dog	dog	mammal	3	0	girl	sixth	0	0	0	0	1	0	no
3	5	high	exurban	finger monkeys	finger monkey	finger monkey	primate	mammal	1	0	girl	sixth	0	0	0	0	1	0	no
3	5	high	exurban	hampster	hamster	hamster	small mammal	mammal	3	0	girl	sixth	0	0	0	0	1	0	no
3	5	high	exurban	cats	cat	cat	cat	mammal	3	0	girl	sixth	0	0	0	0	1	0	yes
3	5	high	exurban	chinchila	chinchilla	chinchilla	small mammal	mammal	3	0	girl	sixth	0	0	0	0	1	0	yes
3	5	high	exurban	dogs	dog	dog	dog	mammal	3	0	girl	sixth	0	0	0	0	1	0	yes
3	5	high	exurban	hamsters	hamster	hamster	small mammal	mammal	3	0	girl	sixth	0	0	0	0	1	0	yes
3	5	high	exurban	Cats	cat	cat	cat	mammal	3	0	girl	sixth	0	0	0	0	1	0	no
3	5	high	exurban	Koalas	koala	koala	marsupial	mammal	1	0	girl	sixth	0	0	0	0	1	0	no
3	5	high	exurban	Raccoons	raccoon	raccoon	other carnivore	mammal	0	1	girl	sixth	0	0	0	0	1	0	no
3	5	high	exurban	Wolves	wolf	wolf	canid	mammal	1	0	girl	sixth	0	0	0	0	1	0	no
3	5	high	exurban	cats	cat	cat	cat	mammal	3	0	girl	sixth	0	0	0	0	1	0	yes
3	5	high	exurban	elephants	elephant	elephant	African megafauna	mammal	1	0	girl	sixth	0	0	0	0	1	0	yes
3	5	high	exurban	girrafes	giraffe	giraffe	African megafauna	mammal	1	0	girl	sixth	0	0	0	0	1	0	yes
3	5	high	exurban	monkeys	monkey	monkey	primate	mammal	1	0	girl	sixth	0	0	0	0	1	0	yes
3	5	high	exurban	kittens	baby cat	cat	cat	mammal	3	0	girl	sixth	0	0	1	0	0	0	no
3	5	high	exurban	puppies	baby dog	dog	dog	mammal	3	0	girl	sixth	0	0	1	0	0	0	no
3	5	high	exurban	horeses	horse	horse	domestic ungulate	mammal	3	0	girl	sixth	0	0	1	0	0	0	no
3	5	high	exurban	gorrila	gorilla	gorilla	primate	mammal	1	0	boy	sixth	0	1	0	1	0	0	no
3	5	high	exurban	liger	liger	liger	big cat	mammal	1	0	boy	sixth	0	1	0	1	0	0	no
3	5	high	exurban	rino	rhinoceros	rhinoceros	African megafauna	mammal	1	0	boy	sixth	0	1	0	1	0	0	no
3	5	high	exurban	tiger	tiger	tiger	big cat	mammal	1	0	boy	sixth	0	1	0	1	0	0	no
3	5	high	exurban	DASHHOUND	deer	deer	ungulate	mammal	2	1	boy	sixth	0	0	0	1	0	0	yes
3	5	high	exurban	BEAGLE	beagle	dog	dog	mammal	3	0	boy	sixth	0	0	0	1	0	0	yes
3	5	high	exurban	Mini pin	miniature pinscher	dog	dog	mammal	3	0	boy	sixth	0	0	0	1	0	0	yes
3	5	high	exurban	PIG	pig	pig	domestic ungulate	mammal	3	0	boy	sixth	0	0	0	1	0	0	yes
3	5	high	exurban	Cat	cat	cat	cat	mammal	3	0	girl	sixth	0	0	1	0	1	0	no
3	5	high	exurban	Dogs	dog	dog	dog	mammal	3	0	girl	sixth	0	0	1	0	1	0	no
3	5	high	exurban	Owl	owl	owl	raptor or owl	bird	2	1	girl	sixth	0	0	1	0	1	0	no
3	5	high	exurban	Panda	panda	panda	bear	mammal	1	0	girl	sixth	0	0	1	0	1	0	no
3	5	high	exurban	cobra	cobra	cobra	snake	reptile	1	0	boy	sixth	0	0	0	0	0	1	yes
3	5	high	exurban	black jagur	black jaguar	jaguar	big cat	mammal	1	0	boy	sixth	0	0	0	0	0	1	yes
3	5	high	exurban	tiger	tiger	tiger	big cat	mammal	1	0	boy	sixth	0	0	0	0	0	1	yes
3	5	high	exurban	zebra	zebra	zebra	ungulate	mammal	1	0	boy	sixth	0	0	0	0	0	1	yes
3	5	high	exurban	bobcat	bobcat	bobcat	felid	mammal	0	1	boy	sixth	0	0	0	0	1	0	no
3	5	high	exurban	panda	panda	panda	bear	mammal	1	0	boy	sixth	0	0	0	0	1	0	no
3	5	high	exurban	snake	snake	snake	snake	reptile	3	0	boy	sixth	0	0	0	0	1	0	no
3	5	high	exurban	wolf	wolf	wolf	canid	mammal	1	0	boy	sixth	0	0	0	0	1	0	no
3	5	high	exurban	birds	bird	bird	bird	bird	3	0	boy	sixth	0	0	1	0	0	0	no
3	5	high	exurban	cats	cat	cat	cat	mammal	3	0	boy	sixth	0	0	1	0	0	0	no
3	5	high	exurban	dogs	dog	dog	dog	mammal	3	0	boy	sixth	0	0	1	0	0	0	no
3	5	high	exurban	fish	fish	fish	fish	fish	3	0	boy	sixth	0	0	1	0	0	0	no
3	5	high	exurban	Cat	cat	cat	cat	mammal	3	0	girl	sixth	1	0	0	0	0	0	no
3	5	high	exurban	Dog	dog	dog	dog	mammal	3	0	girl	sixth	1	0	0	0	0	0	no
3	5	high	exurban	Koala	koala	koala	marsupial	mammal	1	0	girl	sixth	1	0	0	0	0	0	no
3	5	high	exurban	Panda	panda	panda	bear	mammal	1	0	girl	sixth	1	0	0	0	0	0	no
3	5	high	exurban	fish	fish	fish	fish	fish	3	0	boy	sixth	0	1	0	0	0	0	no
3	5	high	exurban	frogs	frog	frog	amphibian	amphibian	2	0	boy	sixth	0	1	0	0	0	0	no
3	5	high	exurban	lizards	lizard	lizard	lizard	reptile	3	0	boy	sixth	0	1	0	0	0	0	no
3	5	high	exurban	monkey	monkey	monkey	primate	mammal	1	0	boy	sixth	0	1	0	0	0	0	no
3	5	high	exurban	cats	cat	cat	cat	mammal	3	0	boy	sixth	0	0	1	0	1	0	no
3	5	high	exurban	2 dog	dog	dog	dog	mammal	3	0	boy	sixth	0	0	1	0	1	0	no
3	5	high	exurban	dogs	dog	dog	dog	mammal	3	0	boy	sixth	0	0	1	0	1	0	no
3	5	high	exurban	wolfs	wolf	wolf	canid	mammal	1	0	boy	sixth	0	0	1	0	1	0	no
3	5	high	exurban	deer	deer	deer	ungulate	mammal	2	1	girl	sixth	0	0	0	0	1	0	yes
3	5	high	exurban	hedgehog	hedgehog	hedgehog	small mammal	mammal	1	0	girl	sixth	0	0	0	0	1	0	yes
3	5	high	exurban	squirrles	squirrel	squirrel	small mammal	mammal	2	1	girl	sixth	0	0	0	0	1	0	yes
3	5	high	exurban	zebra	zebra	zebra	ungulate	mammal	1	0	girl	sixth	0	0	0	0	1	0	yes
3	5	high	exurban	kittens	baby cat	cat	cat	mammal	3	0	girl	sixth	0	0	1	0	1	0	no
3	5	high	exurban	puppies	baby dog	dog	dog	mammal	3	0	girl	sixth	0	0	1	0	1	0	no
3	5	high	exurban	dolphins	dolphin	dolphin	marine mammal	mammal	1	0	girl	sixth	0	0	1	0	1	0	no
3	5	high	exurban	polar bears	polar bear	polar bear	bear	mammal	1	0	girl	sixth	0	0	1	0	1	0	no
3	5	high	exurban	cheeta	cheetah	cheetah	felid	mammal	1	0	boy	sixth	0	0	0	0	1	0	no
3	5	high	exurban	frogs	frog	frog	amphibian	amphibian	2	0	boy	sixth	0	0	0	0	1	0	no
3	5	high	exurban	geco	gecko	gecko	lizard	reptile	2	0	boy	sixth	0	0	0	0	1	0	no
3	5	high	exurban	sharks	shark	shark	shark	fish	1	0	boy	sixth	0	0	0	0	1	0	no
3	5	high	exurban	aliergaters	alligator	alligator	alligator or crocodile	reptile	1	0	boy	sixth	0	1	0	0	0	0	no
3	5	high	exurban	cheeth	cheetah	cheetah	felid	mammal	1	0	boy	sixth	0	1	0	0	0	0	no
3	5	high	exurban	snakes	snake	snake	snake	reptile	3	0	boy	sixth	0	1	0	0	0	0	no
3	5	high	exurban	tigers	tiger	tiger	big cat	mammal	1	0	boy	sixth	0	1	0	0	0	0	no
3	5	high	exurban	dog	dog	dog	dog	mammal	3	0	boy	sixth	0	1	0	0	0	0	no
3	5	high	exurban	leopard	leopard	leopard	big cat	mammal	1	0	boy	sixth	0	1	0	0	0	0	no
3	5	high	exurban	trained lion	trained lion	lion	big cat	mammal	1	0	boy	sixth	0	1	0	0	0	0	no
3	5	high	exurban	monkey	monkey	monkey	primate	mammal	1	0	boy	sixth	0	1	0	0	0	0	no
3	5	high	exurban	fish	fish	fish	fish	fish	3	0	boy	sixth	0	0	0	1	0	0	no
3	5	high	exurban	kangaroo	kangaroo	kangaroo	marsupial	mammal	1	0	boy	sixth	0	0	0	1	0	0	no
3	5	high	exurban	rino	rhinoceros	rhinoceros	African megafauna	mammal	1	0	boy	sixth	0	0	0	1	0	0	no
3	5	high	exurban	wale	whale	whale	marine mammal	mammal	1	0	boy	sixth	0	0	0	1	0	0	no
3	5	high	exurban	deer	deer	deer	ungulate	mammal	2	1	girl	sixth	0	0	0	0	1	0	no
3	5	high	exurban	fox	fox	fox	canid	mammal	2	1	girl	sixth	0	0	0	0	1	0	no
3	5	high	exurban	rabbit	rabbit	rabbit	rabbit	mammal	3	0	girl	sixth	0	0	0	0	1	0	no
3	5	high	exurban	wolf	wolf	wolf	canid	mammal	1	0	girl	sixth	0	0	0	0	1	0	no
3	5	high	exurban	Cats	cat	cat	cat	mammal	3	0	girl	sixth	0	0	0	0	1	0	no
3	5	high	exurban	Dog	dog	dog	dog	mammal	3	0	girl	sixth	0	0	0	0	1	0	no
3	5	high	exurban	Horses	horse	horse	domestic ungulate	mammal	3	0	girl	sixth	0	0	0	0	1	0	no
3	5	high	exurban	Bunnies	rabbit	rabbit	rabbit	mammal	3	0	girl	sixth	0	0	0	0	1	0	no
3	5	high	exurban	baby cheetahs	baby cheetah	cheetah	felid	mammal	1	0	girl	sixth	0	0	1	0	0	0	no
3	5	high	exurban	Elephants	elephant	elephant	African megafauna	mammal	1	0	girl	sixth	0	0	1	0	0	0	no
3	5	high	exurban	pandas	panda	panda	bear	mammal	1	0	girl	sixth	0	0	1	0	0	0	no
3	5	high	exurban	zebra	zebra	zebra	ungulate	mammal	1	0	girl	sixth	0	0	1	0	0	0	no
3	5	high	exurban	bobcat zebra	bobcat	bobcat	felid	mammal	0	1	boy	sixth	1	0	1	1	1	0	no
3	5	high	exurban	dogs	dog	dog	dog	mammal	3	0	boy	sixth	1	0	1	1	1	0	no
3	5	high	exurban	dogs cats monkeys	dog	dog	dog	mammal	3	0	boy	sixth	1	0	1	1	1	0	no
3	5	high	exurban	pandas kangaroo cat dogs	panda	panda	bear	mammal	1	0	boy	sixth	1	0	1	1	1	0	no
3	5	high	exurban	dogs	dog	dog	dog	mammal	3	0	girl	seventh	0	1	0	0	0	0	no
3	5	high	exurban	baby dolphins	baby dolphin	dolphin	marine mammal	mammal	1	0	girl	seventh	0	1	0	0	0	0	no
3	5	high	exurban	dolphins	dolphin	dolphin	marine mammal	mammal	1	0	girl	seventh	0	1	0	0	0	0	no
3	5	high	exurban	kangaroo	kangaroo	kangaroo	marsupial	mammal	1	0	girl	seventh	0	1	0	0	0	0	no
3	5	high	exurban	anole	anole	anole	lizard	reptile	1	0	boy	sixth	0	0	0	0	1	0	no
3	5	high	exurban	cat	cat	cat	cat	mammal	3	0	boy	sixth	0	0	0	0	1	0	no
3	5	high	exurban	Yorkshire terrier	yorkshire terrier	dog	dog	mammal	3	0	boy	sixth	0	0	0	0	1	0	no
3	5	high	exurban	skink	skink	skink	lizard	reptile	2	1	boy	sixth	0	0	0	0	1	0	no
3	5	high	exurban	cats	cat	cat	cat	mammal	3	0	girl	sixth	0	0	0	0	1	0	yes
3	5	high	exurban	puppys	baby dog	dog	dog	mammal	3	0	girl	sixth	0	0	0	0	1	0	yes
3	5	high	exurban	horse	horse	horse	domestic ungulate	mammal	3	0	girl	sixth	0	0	0	0	1	0	yes
3	5	high	exurban	panda bears	panda	panda	bear	mammal	1	0	girl	sixth	0	0	0	0	1	0	yes
3	5	high	exurban	cat	cat	cat	cat	mammal	3	0	boy	sixth	0	0	1	0	0	0	yes
3	5	high	exurban	dog	dog	dog	dog	mammal	3	0	boy	sixth	0	0	1	0	0	0	yes
3	5	high	exurban	lion	lion	lion	big cat	mammal	1	0	boy	sixth	0	0	1	0	0	0	yes
3	5	high	exurban	zebra	zebra	zebra	ungulate	mammal	1	0	boy	sixth	0	0	1	0	0	0	yes
3	5	high	exurban	deer	deer	deer	ungulate	mammal	2	1	girl	sixth	0	0	0	1	1	1	yes
3	5	high	exurban	horses	horse	horse	domestic ungulate	mammal	3	0	girl	sixth	0	0	0	1	1	1	yes
3	5	high	exurban	snakes	snake	snake	snake	reptile	3	0	girl	sixth	0	0	0	1	1	1	yes
3	5	high	exurban	tiger	tiger	tiger	big cat	mammal	1	0	girl	sixth	0	0	0	1	1	1	yes
2	5	high	exurban	deer	deer	deer	ungulate	mammal	2	1	boy	sixth	0	0	0	0	1	0	yes
2	5	high	exurban	dog	dog	dog	dog	mammal	3	0	boy	sixth	0	0	0	0	1	0	yes
2	5	high	exurban	halk	hawk	hawk	raptor or owl	bird	2	1	boy	sixth	0	0	0	0	1	0	yes
2	5	high	exurban	rabbit	rabbit	rabbit	rabbit	mammal	3	0	boy	sixth	0	0	0	0	1	0	yes
1	6	medium	suburban	Cameleon	chameleon	chameleon	lizard	reptile	1	0	boy	eigth	1	0	0	0	1	0	no response
1	6	medium	suburban	Elephants	elephant	elephant	African megafauna	mammal	1	0	boy	eigth	1	0	0	0	1	0	no response
1	6	medium	suburban	Snakes	snake	snake	snake	reptile	3	0	boy	eigth	1	0	0	0	1	0	no response
1	6	medium	suburban	Bears	bear	bear	bear	mammal	2	1	boy	eigth	0	1	0	0	0	0	no response
1	6	medium	suburban	Dogs	dog	dog	dog	mammal	3	0	boy	eigth	0	1	0	0	0	0	no response
1	6	medium	suburban	Lions	lion	lion	big cat	mammal	1	0	boy	eigth	0	1	0	0	0	0	no response
1	6	medium	suburban	Tigers	tiger	tiger	big cat	mammal	1	0	boy	eigth	0	1	0	0	0	0	no response
[truncated: 6,478 more rows]
